## **A specialized MreB-dependent complex mediates the formation of stalk-specific peptidoglycan in *Caulobacter crescentus***

**Maria Billini<sup>1,2</sup>, Jacob Biboy<sup>3</sup>, Juliane Kühn<sup>2</sup>, Waldemar Vollmer<sup>3</sup>, Martin Thanbichler<sup>1,2,4</sup>**

<sup>1</sup>Faculty of Biology, Philipps-Universität, Marburg, Germany

<sup>2</sup>Max Planck Institute for Terrestrial Microbiology, Marburg, Germany

<sup>3</sup>Centre for Bacterial Cell Biology, Institute for Cell and Molecular Biosciences, Newcastle University, Newcastle upon Tyne, UK

<sup>4</sup>LOEWE Center for Synthetic Microbiology, Marburg, Germany

### Key words:

morphogenesis, stalked bacteria, phosphate starvation, MreB, bactofilin, LD-transpeptidases, lytic transglycosylases, DipM, SdpAB, LdpA, CrbA

\*For correspondence:

E-mail: [thanbichler@uni-marburg.de](mailto:thanbichler@uni-marburg.de); Tel: (+49) 6421 2821809; Fax: (+49) 6421 2821832

## 1 **Abstract**

2 Many bacteria have complex cell shapes, but the mechanisms producing their distinctive morphologies  
3 are still poorly understood. *Caulobacter crescentus*, for instance, exhibits a stalk-like extension that carries  
4 an adhesive holdfast mediating surface attachment. This structure forms through zonal peptidoglycan  
5 biosynthesis at the old cell pole and elongates extensively under phosphate-limiting conditions. We  
6 analyzed the composition of cell body and stalk peptidoglycan and identified significant differences in the  
7 nature and proportion of peptide crosslinks, indicating that the stalk represents a distinct subcellular  
8 domain with specific mechanical properties. To identify factors that participate in stalk formation, we  
9 systematically inactivated and localized predicted components of the cell wall biosynthetic machinery of  
10 *C. crescentus*. Our results show that the biosynthesis of stalk peptidoglycan involves a dedicated  
11 peptidoglycan biosynthetic complex that combines specific components of the divisome and elongasome,  
12 suggesting that the repurposing of pre-existing machinery provides a straightforward means to evolve  
13 new morphological traits.

## 14 Introduction

15 The shape of most bacteria is determined by a cell wall made of peptidoglycan (PG), a mesh-like hetero-  
16 polymer that surrounds the cytoplasmic membrane and provides resistance against the internal osmotic  
17 pressure (Typas et al., 2012; Vollmer et al., 2008). The backbone of PG is formed by strands of alternating  
18 *N*-acetylglucosamine (GlcNAc) and *N*-acetylmuramic acid (MurNAc) subunits. These glycan chains are  
19 connected by short peptides that are attached to the MurNAc moieties, giving rise to a single elastic  
20 macromolecule known as the PG sacculus (Schleifer and Kandler, 1972).

21 The PG meshwork needs to be continuously remodeled to allow for cell growth and division (den  
22 Blaauwen et al, 2008). This task is achieved by a large and highly redundant set of PG synthesizing and  
23 degrading enzymes. Insertion of new cell wall material is initiated by the translocation of lipid-linked  
24 GlcNAc-MurNAc-pentapeptide precursors across the cytoplasmic membrane to the periplasm  
25 (Mohammadi et al., 2011; Sham et al., 2014; van Heijenoort, 2007). Glycosyltransferases (GTases) then  
26 incorporate the disaccharide units into preexisting glycan strands, while the L-Ala-D-Glu-L-Lys/*meso*-  
27 DAP-D-Ala-D-Ala pentapeptides of adjacent glycan strands are crosslinked by transpeptidases (TPases)  
28 (Typas et al., 2012; Vollmer & Bertsche, 2008). Depending on their domain structure, PG synthases can be  
29 classified as bifunctional GTases/TPases (class A PBPs), monofunctional TPases (class B PBPs) and  
30 monofunctional GTases (Vollmer and Bertsche, 2008). The majority of TPases are DD-TPases, also known  
31 as penicillin-binding proteins (PBPs) (Suginaka et al., 1972). These proteins catalyze the formation of D-  
32 Ala<sup>4</sup>-*meso*-DAP<sup>3</sup> (4-3) crosslinks, in a reaction that releases the D-Ala<sup>5</sup> moiety of the donor molecule  
33 (Glauner et al., 1988). Alternatively, crosslinks can also be formed between two *meso*-DAP<sup>3</sup> residues (3-3  
34 crosslinks), catalyzed by specific LD-TPases that use tetrapeptide side chains as donor moieties and release  
35 their terminal D-Ala<sup>4</sup> residue to gain energy for the crosslinking reaction (Magnet et al., 2008). To remodel  
36 the PG sacculus during growth and division, cells require not only synthetic but also lytic enzymes that  
37 cleave bonds in the PG meshwork and thus make space for the insertion of new material (Höltje, 1995).  
38 Depending on their cleavage specificity, these so-called autolysins can be typically sorted into three main  
39 categories. Lytic transglycosylases act on the glycan strands and cleave the β-1,4-glycosidic bond between  
40 MurNAc and GlcNAc, leaving 1,6-anhydro-MurNAc as the terminal residue (Scheurwater et al., 2008).  
41 Amidases, by contrast, hydrolyze the amide bond between the peptide and the MurNAc moiety (Höltje,  
42 1995), whereas endo- and carboxypeptidases hydrolyze specific amide bonds within the peptides (van  
43 Heijenoort, 2011; Vollmer and Bertsche, 2008).

44 The formation and degradation of PG need to be closely coordinated to prevent cell lysis (Rice and Bayles,  
45 2008; Typas et al., 2012), a task that is presumably achieved by the assembly of synthetic and lytic  
46 enzymes into dynamic multi-protein complexes (Höltje, 1998). In the majority of rod-shaped bacteria, two  
47 of these complexes have been identified to date. The first one, called the elongasome, mediates the  
48 dispersed incorporation of new PG along the lateral walls of the cell during the elongation phase. Its  
49 positioning is controlled by the actin-like protein MreB (Daniel and Errington, 2003; Jones et al., 2001; van  
50 den Ent et al., 2001), which forms patch- or arc-like filaments that are attached to the inner face of the  
51 cytoplasmic membrane (Dominguez-Escobar et al., 2011; Garner et al., 2011; Olshausen et al., 2013; Salje  
52 et al., 2011; van Teeffelen et al., 2011). These structures move around the circumference of the cell and,  
53 thus, ensure even growth of the rod-shaped sacculus. Their effect on the PG biosynthetic machinery is  
54 mediated by the transmembrane protein RodZ (Alyahya et al., 2009; Bendezu et al., 2009; Shiomi et al.,  
55 2008), which links MreB to a periplasmic complex containing the elongation-specific monofunctional  
56 TPase PBP2 (Lee et al., 2014; Morgenstein et al., 2015; Typas et al., 2012). Towards the end of the  
57 elongation phase, PG synthesis is taken over by a second complex, called the divisome (Du and  
58 Lutkenhaus, 2017; Typas et al., 2012), which mediates pre-septal elongation and subsequent constriction  
59 of the PG sacculus at midcell. Its positioning and activity are regulated by FtsZ, a tubulin homolog that  
60 assembles into a dynamic ring-like structure at the future division site. This so-called Z-ring then recruits,  
61 directly or indirectly, all other components of the cell division machinery. The divisome includes a variety  
62 of PG synthases and hydrolases, among them the division-specific monofunctional TPase PBP3 (Weiss et  
63 al., 1999), which act together to coordinately remodel the PG layer during the division process. Of note,  
64 in some species, MreB relocates to the division site at the onset of cell constriction, suggesting that the  
65 elongasome and divisome cooperate during certain stages of the division cycle (Fenton and Gerdes, 2013;  
66 Figge et al., 2004).

67 While the function of the elongasome and divisome and their roles in establishment of generic rod and  
68 coccoid morphologies have been studied intensively (Egan et al., 2017; Typas et al., 2012), the  
69 mechanisms generating more complex cell shapes are still poorly understood. A model organism known  
70 for its distinctive morphological features is the alphaproteobacterium *Caulobacter crescentus* (henceforth  
71 *Caulobacter*) (Poindexter, 1964). This species is characterized by a biphasic life cycle that involves two  
72 morphologically and physiologically distinct cell types. One of them, the swarmer cell, possesses a single  
73 polar flagellum mediating swimming motility. The stalked cell, by contrast, displays a tubular extension  
74 (stalk) whose tip carries an adhesive holdfast mediating surface attachment. Whereas the stalked cell  
75 undergoes repeated cycles of chromosome replication and cell division, the swarmer cell is arrested in G1

76 phase, searching its environment for nutrients. However, at a defined point in the cell cycle, it sheds its  
77 flagellum, starts to establish a stalk at the previously flagellated pole, and enters S phase. The cell then  
78 elongates, forms a new flagellum at the pole opposite the stalk, and finally divides asymmetrically to  
79 produce a stalked cell and a new swarmer cell (Curtis and Brun, 2010). The biological role of the  
80 *Caulobacter* stalk is still controversial, but it may serve as a spacer to elevate the cell above the substratum  
81 and thus enhance its access to nutrients (Klein et al., 2013). Consistent with this idea, its length increases  
82 up to 20-fold under conditions of phosphate limitation (Schmidt and Stanier, 1966).

83 In *Caulobacter* species, the stalk consists almost exclusively of the three cell envelope layers (inner  
84 membrane, cell wall and outer membrane) and does not contain any cytoplasm (Ireland et al., 2002;  
85 Poindexter, 1964). Moreover, it is compartmentalized by large disc-like protein complexes, so-called  
86 crossbands, which are deposited at irregular intervals along its length, serving as non-selective diffusion  
87 barriers that physiologically separate the stalk envelope from the cell body (Poindexter, 1964; Schlimpert  
88 et al., 2012). Formation of the stalk is driven by zonal incorporation of new cell wall material at the stalk  
89 base, as detected by the labeling of newly synthesized PG with tritiated glucose (Schmidt and Stanier,  
90 1966), radiolabeled D-cysteine (Aaron et al., 2007), or fluorescently labeled D-alanine derivatives (Kuru et  
91 al., 2012). To date, various mutants have been identified that lack stalks under standard growth conditions  
92 (Biondi et al., 2006; Bowman et al., 2008; Ebersbach et al., 2008; Sommer and Newton, 1989). However,  
93 in all cases, cells regained the ability to form stalks after transfer into phosphate-limited media, indicating  
94 that they suffered from a block in the cell cycle-regulated initiation of stalk formation rather than a defect  
95 in the underlying biosynthetic machinery. By contrast, depletion of MreB or the hypothetical elongasome-  
96 specific GTase RodA (Meeske et al., 2016) was shown to impair stalk elongation under all growth  
97 conditions (Wagner et al., 2005). Similar results were obtained upon inhibition of the elongasome-specific  
98 TPase PBP2 (Seitz and Brun, 1998) with the  $\beta$ -lactam antibiotic mecillinam. However, because of the global  
99 effects of these treatments, it was difficult to conclude on a specific role of the three proteins in the stalk  
100 biosynthetic pathway. Finally, a moderate reduction in stalk length was observed for mutants lacking the  
101 cytoskeletal protein bactofilin A (BacA) or the BacA-associated class A PBP PbpC (Kühn et al., 2010).  
102 Together, these results suggest that components of the generic PG biosynthetic apparatus may be critical  
103 for stalk formation, but the precise composition of the machinery responsible for this process still remains  
104 elusive.

105 In the present study, we comprehensively investigate the mechanism of stalk formation, focusing on  
106 phosphate-limiting conditions to obtain a sensitive readout of the contributions that individual factors

107 make to this process. We show that phosphate starvation induces a G0-like resting state that is charac-  
108 terized by the absence of key cell cycle regulators, including FtsZ. Comparing the mucopeptide profiles of  
109 isolated stalk and cell body PG, we then identify significant differences in the composition of cell walls  
110 from these two compartments, suggesting that stalks are formed by specialized machinery with distinct  
111 biosynthetic properties. Systematic deletion and localization studies of cytoskeletal and PG biosynthetic  
112 proteins then indeed reveal a distinct set of factors involved in stalk elongation, which we characterize in  
113 detail with respect to their impact on PG composition and the spatial regulation of PG biosynthesis.  
114 Morphometric analysis of the corresponding mutants shows that these factors make varying and, in part  
115 specific, contributions to stalk and cell body elongation, indicating that these two modes of growth are  
116 mechanistically distinct. Finally, we identify MreB as a key component of the stalk biosynthetic complex  
117 and pinpoint a region on its surface that appears to be required for stalk formation but largely dispensable  
118 for elongasome-mediated lateral growth. Collectively, our results show that stalk formation represents a  
119 specialized growth process that is mediated by a composite complex including components of both the  
120 elongasome and divisome, with distinctive properties that clearly differentiate it from other PG  
121 biosynthetic machineries.

## 122 **Results**

### 123 **Phosphate limitation arrests the cell cycle of *Caulobacter* in G1-phase**

124 Although the stimulatory effect of phosphate starvation on *Caulobacter* stalk elongation has been known  
125 for decades (Schmidt and Stanier, 1966), the underlying regulatory mechanisms are still poorly under-  
126 stood. Prompted by the fact that stalk formation is tightly linked to cell cycle progression, we set out to  
127 investigate the effects of phosphate deprivation on central cellular processes such as DNA replication and  
128 cell division. First, flow cytometry was used to assess the replicational state of cells after transfer from  
129 standard to phosphate-free (M2G<sup>P</sup>) medium. To this end, replication initiation was blocked with  
130 rifampicin and ongoing rounds of replication were allowed to finish. Previous work has shown that  
131 *Caulobacter* cells contain a single chromosome that is replicated only once per division cycle (Collier, 2012;  
132 Quon et al., 1998). Consistent with this finding, we observed that cells accumulated either one or two  
133 chromosome equivalents when grown in standard conditions, indicating that a large fraction of the  
134 population was in S-phase (**Figure 1A**). However, upon phosphate deprivation, DNA replication gradually  
135 ceased, with most cells arrested in G1-phase after 24 h of incubation. These data suggest that the lack of  
136 phosphate leads to a block in the cell cycle prior to S-phase, thereby preventing new rounds of  
137 chromosome replication. To support this conclusion, we visualized the number and positions of the  
138 chromosomal replication origins. In doing so, we made use of a fluorescently (GFP-) tagged derivative of  
139 the chromosome partitioning protein ParB, which interacts with specific motifs (*parS*) in the origin region  
140 (Mohl and Gober, 1997; Thanbichler and Shapiro, 2006). The expression of GFP-ParB thus typically results  
141 in the detection of either one or two foci, depending on the number of origin copies in the cell.  
142 Microscopic analysis revealed that most (~ 85%) cells exhibited a single ParB focus at the stalked pole  
143 when subjected to 24 h of phosphate starvation, indicating that they are arrested in G1 phase (**Figure 1B**).  
144 To clarify the reason for this G1 arrest, we analyzed the cellular levels of the replication initiator protein  
145 DnaA and the cell cycle master regulator CtrA, which act as positive and negative regulators of  
146 chromosome replication, respectively (Collier, 2012). Interestingly, both proteins were rapidly depleted  
147 from the cells during phosphate starvation (**Figure 1C**), indicating that key drivers of the *Caulobacter* cell  
148 cycle are absent under this condition.

149 To correlate changes in cell cycle progression with the growth behavior of cells, we monitored changes in  
150 cell mass and number after a shift to phosphate-limiting conditions. Interestingly, the optical density of  
151 cultures kept increasing exponentially for more than 10 h and only leveled off after ~ 50 h of incubation  
152 (**Figure 1D**), suggesting that cells made use of internal phosphate storage compounds to compensate for

153 the lack of an external phosphate source. Consistent with the detection of DNA replication events  
154 (**Figure 1A**), cells still multiplied during the initial exponential phase. However, after longer starvation  
155 periods (> 24 h), the viable-cell count started to decline, whereas the cell mass still increased, likely due  
156 to continued elongation of the cell bodies and stalks in the absence of cell division events. Western blot  
157 analysis indeed revealed that the essential cell division protein FtsZ was depleted from the cells upon  
158 phosphate starvation (**Figure 1C**). The same was true for the cell division regulator MipZ, an inhibitor of  
159 FtsZ polymerization that limits Z-ring formation to the midcell region (Thanbichler and Shapiro, 2006). In  
160 line with these findings, an FtsZ-YFP fusion induced after prolonged phosphate starvation formed multiple  
161 foci in the vicinity of the stalk-distal pole instead of a defined midcell band (**Figure 1B**), indicating the  
162 absence of a functional and properly localized Z-ring (Thanbichler and Shapiro, 2006). Notably, FtsZ was  
163 never observed at the stalk base, supporting the previous notion that it does not play any role in stalk  
164 formation (Thanbichler and Shapiro, 2006).

165 Taken together, our results demonstrate that phosphate starvation arrests the *Caulobacter* cell cycle in a  
166 G1-like phase, thereby stalling DNA replication and cell division until phosphate becomes available again.

### 167 **Phosphate starvation induces a distinct pattern of PG synthesis**

168 Phosphate starvation induces *Caulobacter* to enter a non-replicative resting state in which cells continue  
169 to elongate their cell body and stalk. To investigate this atypical mode of growth, we set out to visualize  
170 sites of active PG biosynthesis using the fluorescent D-amino acid 7-hydroxy-coumarin-amino-D-alanine  
171 (HADA) (Kuru et al., 2012; Kuru et al., 2015) as a tracer. As a control, we initially analyzed the growth  
172 dynamics of cells growing in phosphate-replete medium. To this end, cells were synchronized and then  
173 pulse-labeled with HADA at different stages of the cell cycle. Consistent with previous results (Aaron et  
174 al., 2007), we observed disperse incorporation of new cell wall material before the onset of cell division,  
175 followed by zonal growth at midcell during the constriction phase (**Figure 2—figure supplement 1**).  
176 Moreover, concurrent with the switch from disperse to zonal growth, an additional intense focus of  
177 fluorescence appeared at one of the cell poles, reflecting the establishment and outgrowth of the stalk.  
178 This polar signal faded gradually as the cell cycle progressed and was no longer detectable in late pre-  
179 divisional cells. Thus, HADA reliably detected all known growth zones in *Caulobacter* cells.

180 Next, we used HADA labeling to determine the pattern of PG synthesis under phosphate-limiting  
181 conditions (**Figure 2A**). After 6 h of incubation in phosphate-free medium, most cells showed a bright  
182 fluorescent patch at the stalked pole as well as a faint disperse signal extending throughout the rest of  
183 the cell body. Cells longer than ~ 4  $\mu\text{m}$  often displayed an additional bright focus at their center, which



184 likely reflects FtsZ-dependent zonal growth or cell division, consistent with the observation that the viable-  
185 cell counts still increased in the early phase of starvation (**Figures 1D and Figure 2–figure supplement 2A**).  
186 Interestingly, the intensity of the polar signal decreased considerably upon appearance of a midcell focus,  
187 suggesting that the machineries mediating stalk formation and cell division may compete with each other  
188 for at least some of their components (**Figure 2A**). After longer starvation periods (>18 h), midcell foci  
189 were almost undetectable, and HADA fluorescence was largely limited to the stalk base, which correlates  
190 with the lack of cell division events at this time point. Notably, the intensity of the polar signal decreased  
191 slightly during long-term incubation (**Figure 2–figure supplement 2B**), although the rate of stalk elonga-  
192 tion remained constant at all time points (**Figure 2B**). The increase in cell body length, by contrast, was  
193 most pronounced during the early phases of starvation, when cells still showed midcell HADA foci,  
194 suggesting that it may, at least in part result, from FtsZ-mediated zonal growth at the cell center. Collec-  
195 tively, phosphate starvation induces a switch in the pattern of PG synthesis that ultimately limits cell  
196 growth to the stalked cell pole.

197 Our and previous labeling studies suggest that stalk formation is driven by the insertion of new cell wall  
198 material at the stalk base (Aaron et al., 2007; Kuru et al., 2012; Schmidt and Stanier, 1966). To determine  
199 whether stalk PG is still subject to modification or turnover, phosphate-starved *Caulobacter* cells were  
200 incubated with HADA for an extended period of time (1.5 h). After this treatment, staining was observed  
201 throughout the entire cell envelope, including distal segments of the stalk that were clearly formed prior  
202 to the start of the labeling procedure (**Figure 2C**). This finding demonstrates the presence of trans-  
203 peptidase activity in the stalk compartment that mediated the incorporation of HADA independently of  
204 the pole-associated biosynthetic complex. After transfer of the cells to HADA-free medium, fluorescence  
205 was rapidly lost in the cell bodies and in the basal region of the stalk, whereas it was stably retained in the  
206 distal stalk segments, indicating that stalk PG is not turned over at significant rates (**Figure 2C**). Notably,  
207 the same behavior was observed for a strain lacking crossbands. The distinct behavior of cell bodies and  
208 stalks may thus not be due to restrictions in the diffusion of envelope-localized PG biosynthetic enzymes  
209 but, potentially, rather due to the absence of cytoplasm in the stalk compartment.

### 210 **The stalk and cell body show different PG architectures**

211 The distinct mode of growth involved in stalk formation opens the possibility that there may be com-  
212 positional differences between the PG layers encompassing the cell body and stalk compartments. To  
213 address this issue, phosphate-starved cells were agitated vigorously to shear off stalks from the cell  
214 bodies. After separation of the two compartments by differential centrifugation (**Figure 3–figure**

215 **supplement 1**), PG was isolated from each of the fractions and subjected to muropeptide analysis.  
216 Interestingly, stalk PG contained a high proportion of 3-3 crosslinked peptides and non-crosslinked  
217 tripeptides (resulting from the cleavage of 3-3 bonds), whereas these muropeptide species were barely  
218 detectable in the cell body samples (**Figure 3** and **Supplementary file 1**). Similarly, the total fraction of  
219 crosslinked peptide side chains was significantly higher in stalk PG, mostly because of a higher proportion  
220 of trimeric muropeptides. The glycan chain lengths, by contrast, did not vary between the two  
221 compartments. Collectively, these findings indicate that the PG layers of stalks and cell bodies differ in  
222 both the type and extent of peptide crosslinks.

223 Previous work has shown that 3-3 crosslinks are generated by LD-TPases, which are characterized by a  
224 conserved YkuD domain (Magnet et al., 2008). The *Caulobacter* genome contains two so-far unchar-  
225 acterized open reading frames, CC\_1511 and CC\_3744, which encode proteins with this signature domain  
226 (now referred to as LdtD and LdtX, respectively). To determine how these factors contribute to the  
227 distinctive composition of the stalk cell wall, we generated a strain carrying in-frame deletions in both the  
228 *ldtD* and *ldtX* gene and analyzed the composition of PG purified from its stalk and cell body compartments.  
229 In both samples, 3-3 crosslinked peptides and non-crosslinked tripeptides were virtually undetectable  
230 (**Figure 3** and **Supplementary file 1**), indicating that the formation of these muropeptide species is linked  
231 to the activity of the two predicted LD-TPases. Notably, however, the total fraction of crosslinked peptides  
232 barely changed in either of the compartments, because the loss of 3-3 crosslinks was compensated by a  
233 proportional increase in the fraction of 4-3 crosslinks. Thus, LD-TPase activity is not the main factor  
234 responsible for the elevated degree of crosslinking in stalk PG.

235 Previous work has shown that the stalk is physiologically separated from the cell body, because it is devoid  
236 of cytoplasm and contains crossband complexes that block the exchange of periplasmic and membrane  
237 proteins (Schlimpert et al., 2012). It was conceivable that crossbands could help establish the differences  
238 in the PG composition observed for the two compartments, for instance by facilitating the establishment  
239 of distinct pools of PG biosynthetic enzymes or blocking the diffusion of lipid II into the stalk structure. To  
240 test this idea we determined the muropeptide profile of stalk and cell body PG isolated from a crossband-  
241 less strain ( $\Delta$ *stpAB*, SW51). Notably, we still observed a higher content of 3-3 crosslinks and a higher total  
242 proportion of crosslinked peptides in stalk PG (**Supplementary file 1**). Similar to the differences in PG  
243 turnover (**Figure 2C**), this characteristic thus appear to be independent of the presence of crossbands.

## 244 **Stalk formation involves class A and class B penicillin-binding proteins**

245 Stalk formation involves a growth process that is distinct from the disperse and zonal incorporation of PG  
246 mediated by the elongasome or division complex, respectively. To determine the composition of the  
247 underlying machinery, we systematically analyzed all predicted PG biosynthetic proteins encoded in the  
248 *Caulobacter* genome for their contribution to stalk elongation under phosphate-limiting conditions. In  
249 doing so, we initially focused on enzymes with PG synthase activity, including PBPs and LD-TPases. A  
250 previous study has shown that inhibition of the monofunctional DD-TPase PBP2 with mecillinam largely  
251 abolished the synthesis of stalks under standard conditions, although it concomitantly induced severe  
252 morphological defects in the cell body (Seitz and Brun, 1998). To further investigate the role of this  
253 protein, we generated a strain producing a fully functional GFP-PBP2 fusion in place of the wild-type  
254 protein and analyzed the localization pattern of the fluorescently tagged protein under conditions of  
255 phosphate starvation. The majority of cells, in particular those with clearly elongated (longer than ~ 4  $\mu$ m)  
256 cell bodies, showed a faint focus at the stalked cell pole (**Figure 4A**), supporting the idea that PBP2 may  
257 have a role in stalk formation. Previous work has also implicated bifunctional PBPs in stalk elongation,  
258 largely based on the analysis of mutants lacking one of these proteins (Kühn et al., 2010; Yakhnina & Gitai,  
259 2013). To verify and extend these results, we analyzed strains carrying single or multiple mutations in the  
260 PBP-encoding *pbpY*, *pbp1A*, *pbpC*, *pbpX*, and *pbpZ* genes (Strobel et al., 2014; Yakhnina and Gitai, 2013).  
261 Our results confirm that deletion of *pbpC* led to a moderate reduction in stalk length, whereas the absence  
262 of any other PBP, either alone or in combination, did not have any effect (**Figure 4B**). However, as  
263 observed under standard growth conditions (Strobel et al., 2014; Yakhnina and Gitai, 2013), at least one  
264 bifunctional PBP was required for viability during phosphate starvation (**Figure 4-figure supplement 1A**).  
265 In line with the results of the deletion studies, localization analyses revealed that none of the bifunctional  
266 PBPs except for PbpC accumulated at the stalked pole, indicating that these proteins may not be  
267 specifically associated with the stalk biosynthetic machinery (**Figure 4-figure supplement 1B**). Notably,  
268 however, PbpX appeared enriched in the stalk compartments, but the significance of this observation  
269 remains unclear.

270 Finally, we analyzed the role of the two predicted LD-TPases LdtD and LdtX in stalk formation. Although  
271 these proteins make a significant contribution to PG crosslinking in the stalk compartment (**Figure 3**), their  
272 inactivation did not have any apparent phenotypic effect (**Figure 4B**). LD-TPase activity may thus not  
273 contribute to the establishment of the stalk structure per se but rather have an accessory function that  
274 serves to modify the biophysical properties of the PG layer. Localization studies indicate that LdtD and

275 LdtX do not accumulate at the stalk base, suggesting that they may act independently of the polar stalk  
276 biosynthetic machinery (**Figure 4–figure supplement 1C**).

### 277 **Components of the autolytic machinery are critical for stalk formation**

278 Apart from PG synthases, stalk formation must also involve autolytic enzymes that cleave the PG sacculus  
279 and, thus, enable the insertion of new cell wall material at the stalk base. However, to this point, the  
280 nature of the factors involved has remained unknown. To address this issue, we systematically screened  
281 mutants lacking one or multiple predicted PG hydrolases for defects in stalk growth under phosphate-  
282 limiting conditions. The enzymes tested included all LytM-like and NlpC/P60-like endopeptidases, AmiC-  
283 like and CHAP domain-containing amidases, soluble and membrane-bound lytic transglycosylases, and  
284 carboxypeptidases identified in the *Caulobacter* genome (**Supplementary file 2**). In most cases, the lack  
285 of single factors and even the absence of whole enzyme families had no apparent effect on stalk length  
286 (**Figure 5–figure supplement 1**). Four strains, however, displayed obvious morphological defects  
287 (**Figure 5**). One of them was a mutant lacking the protein DipM, a catalytically inactive LytM-like  
288 endopeptidase homolog that was previously shown to be critical for proper PG remodeling during cell  
289 division (Goley et al., 2010; Möll et al., 2010; Poggio et al., 2010). The absence of DipM led to a severe  
290 reduction in stalk length, combined with the formation of branches within the stalk structure or the  
291 establishment of multiple stalks, often emanating from the same pole (**Figure 5–figure supplement 2**).  
292 Even shorter stalks were observed in the combined absence of the soluble lytic transglycosylases SdpA  
293 and SdpB, two proteins previously found to be associated with the divisome complex (Zielinska et al.,  
294 2017). Apart from its aberrant morphology, the  $\Delta sdpAB$  mutant frequently showed membrane blebs that  
295 were associated with the residual stalk structures, suggesting a defect in membrane attachment or  
296 homeostasis (**Figure 5–figure supplement 2**). Milder effects on stalk length were caused by inactivation  
297 of the divisome-associated carboxypeptidase CrbA (Billini *et al*, unpublished) (**Figure 5–figure supple-**  
298 **ment 2**) and the LytM-like endopeptidase LdpA, a thus-far uncharacterized protein encoded in an operon  
299 with the polarly localized scaffolding protein bactofilin A (BacA) (Kühn et al., 2010; Shi et al., 2015) (**Fig-**  
300 **ure 5–figure supplement 2**). Importantly, despite their defects in stalk elongation, none of the four strains  
301 showed a significant reduction in cell length (**Figure 5C**), indicating that stalk and cell body growth are  
302 mechanistically distinct processes that proceed independently of each other.

303 To further investigate the functions of the five autolytic factors identified in the mutational screen, we  
304 generated fluorescently (mCherry-) tagged derivatives of these proteins and analyzed their localization

305 patterns under conditions of phosphate starvation (**Figure 6**). Both the DipM and CrbA fusions accu-  
306 mulated at the stalk base and may, thus, be specifically associated with the polar stalk biosynthetic  
307 machinery. The SdpA and SdpB fusions, by contrast, were distributed throughout the cell envelope, sug-  
308 gesting that the two proteins may either act independently of the polar complex or associate with it in a  
309 very transient manner. Unlike the other proteins analyzed (**Figure 6–figure supplement 1**), LdpA-mCherry  
310 was quantitatively cleaved at the junction between the two fusion partners, preventing further analysis  
311 (data not shown).

312 In order to determine how the absence of the different autolytic factors influenced the pattern of PG  
313 biosynthesis, mutants lacking these proteins were grown in phosphate-limiting conditions and subjected  
314 to HADA staining (**Figure 7**). Consistent with their relatively mild stalk elongation defect,  $\Delta ldpA$  cells still  
315 displayed a pattern similar to that of the wild-type strain. In the  $\Delta dipM$  and  $\Delta crbA$  strains, by contrast, the  
316 polar signals were much fainter and new cell wall material was often incorporated at non-polar sites. An  
317 even more pronounced effect was observed in the  $\Delta sdpAB$  mutant, which virtually lacked polar foci and  
318 instead showed patchy or even HADA fluorescence throughout the cells. Thus, the severity of the stalk  
319 elongation defect scales with the loss in polar PG biosynthesis.

320 To obtain more detailed insight into the effects of the different mutations on the structure of the PG layer,  
321 we isolated whole-cell sacculi from wild-type and mutant cells after prolonged (24 h) phosphate starva-  
322 tion and subjected them to muropeptide analysis (**Supplementary file 3**). For the wild-type strain, whole-  
323 cell sacculi gave similar results as PG from isolated from a cell body fraction (compare **Figure 3** and **Supple-**  
324 **mentary file 1**), indicating that the characteristic features of stalk PG are largely obscured by the excess  
325 of cell body PG in the whole-cell preparations. Interestingly, there were hardly any differences between  
326 the muropeptide profiles obtained under phosphate-limiting (**Supplementary file 3**) and phosphate-  
327 replete (Takacs et al., 2010) conditions. The average composition of cell body PG thus appears to be inde-  
328 pendent of the phosphate supply. Among the mutant strains,  $\Delta ldpA$  cells showed essentially the same  
329 average PG composition as the wild-type strain. The same was true for the  $\Delta dipM$  mutant, with exception  
330 of a significant increase in the proportion of non-crosslinked tetrapeptides (**Supplementary file 3**), which  
331 could indicate an elevated level of endopeptidase and/or carboxypeptidase activity. The muropeptide  
332 profiles of the remaining strains, by contrast, showed marked global changes. In line with the notion that  
333 CrbA acts as a carboxypeptidase, removing the terminal D-Ala residue of pentapeptide side chains (Billini  
334 *et al*, unpublished), the  $\Delta crbA$  mutant displayed a considerable decrease in the total content of tetrapep-  
335 tides that was accompanied by a proportional increase in the content of pentapeptide-containing

336 muropeptide species (**Supplementary file 3**). In  $\Delta$ *sdpAB* cells, on the other hand, the average glycan chain  
337 length increased from 7 to 9.4 disaccharide units, consistent with the loss of lytic transglycosylase activity.  
338 Surprisingly, the mutant cells additionally showed a severe reduction in the degree of crosslinkage. At the  
339 same time, their total content of pentapeptide side chains was reduced, whereas the proportion of  
340 tripeptide side chains was considerably elevated (**Supplementary file 3**). These results suggest that the  
341 lack of SdpAB leads to reduced transpeptidation or, more likely, elevated endopeptidase activity.

342 Collectively, our results show that several components of the autolytic machinery are critical for proper  
343 PG remodeling during stalk formation, with some of them localizing to the stalk base under phosphate-  
344 limiting conditions. Notably, most of the proteins, including DipM, SdpA, SdpB and CrbA, are associated  
345 with the cell division apparatus under standard growth conditions {Möll et al., 2010; Poggio et al., 2010;  
346 Goley et al., 2010; Zielinska et al., 2017; M. Billini, unpublished), suggesting parallels in the mechanisms  
347 underlying cell constriction and stalk growth.

#### 348 **Stalk formation depends on the presence of scaffolding proteins**

349 Polymer-forming scaffolding proteins are critical for the regulation of many growth processes in bacteria  
350 {den Blaauwen et al., 2008; Lin and Thanbichler, 2013}, suggesting that this group of proteins may also  
351 play a critical role in stalk formation. Previous work has indeed implicated the bactofilin homolog BacA in  
352 stalk biogenesis (Kühn et al., 2010). Re-analysis of a  $\Delta$ *bacA* mutant revealed a significant reduction in both  
353 stalk and cell body length during phosphate starvation (**Figures 8 and Figure 8–figure supplement 1**).  
354 Notably, deletion of the endopeptidase gene *ldpA*, which lies in a putative operon with *bacA*, had a very  
355 similar effect on stalk length, whereas it barely affected the cell body (**Figure 5**). These results suggest that  
356 LdpA and BacA may specifically cooperate in stalk formation, whereas BacA is additionally involved in a  
357 distinct pathway involved in cell body elongation.

358 As another scaffolding protein, MreB was shown to be required for stalk formation in media containing  
359 moderate to high levels of phosphate (Divakaruni et al., 2007; Wagner et al., 2005). To clarify the  
360 contribution of this protein to stalk biosynthesis under phosphate starvation, we employed strains  
361 producing MreB or the adapter protein RodZ under the control of an inducible promoter. When starved  
362 for phosphate in the absence of inducer, both mutants showed a drastic reduction in stalk length or  
363 occasionally even failed to form stalks at all (**Figures 8 and Figure 8–figure supplement 1**). The effects on  
364 the cell bodies, by contrast, differed depending on the protein depleted. Cells lacking RodZ showed a  
365 length distribution indistinguishable from that of the wild-type strain. Depletion of MreB, by contrast,  
366 markedly decreased the median cell length. Similar effects were observed for wild-type cells treated with

367 the MreB inhibitor A22 (Gitai et al., 2005; van den Ent et al., 2014) (**Figure 8**). These findings indicate that,  
368 under phosphate-limiting conditions, RodZ appears to be specifically required for stalk biosynthesis,  
369 whereas MreB additionally contributes to cell body elongation, again supporting the idea that these two  
370 processes are driven by distinct mechanisms.

371 Apart from MreB, the MreCD complex has been identified as a factor critical to lateral growth in many  
372 rod-shaped bacteria (den Blaauwen et al., 2008). MreC is thought to serve as a scaffold that interacts with  
373 various PG biosynthetic enzymes, including the monofunctional TPase PBP2 (Contreras-Martel et al.,  
374 2017; Divakaruni et al., 2005). In *E. coli*, it is part of the elongasome complex (Kruse, Bork-Jensen, &  
375 Gerdes, 2005), whereas it was shown to establish an elongasome-independent structure in *Caulobacter*  
376 cells (Divakaruni et al., 2007; Dye et al., 2005). To test for a role of this protein in stalk formation, we  
377 analyzed the morphology of a conditional *mreC* mutant grown under phosphate-limiting conditions  
378 (**Figure 8**). In the absence of inducer, the cells started to elongate but eventually became amorphous and  
379 lyzed. In most cases, stalks were either absent or barely recognizable, indicating that the MreCD complex  
380 may be essential for both cell wall integrity and stalk biosynthesis during phosphate starvation.  
381 Collectively, our results support the notion that various scaffolding proteins are required for proper stalk  
382 biosynthesis in *Caulobacter* cells.

383 To clarify whether the role of the different scaffolding proteins in stalk formation involves their recruit-  
384 ment to the stalked pole, we analyzed the localization patterns of fluorescently tagged derivatives in cells  
385 subjected to phosphate starvation (**Figure 9**). Both the MreB and RodZ fusion formed a distinct focus at  
386 the stalk base and, in rare cases, also a second focus at the pole opposite the stalk. Together with the  
387 polar localization of PBP2 (**Figure 4A**), these findings indicate that key components of the elongasome  
388 complex relocate to the site of stalk biosynthesis in phosphate-limiting conditions. There, they colocalize  
389 with BacA, which retains its polar position irrespective of changes in the phosphate supply (**Figure 9**). The  
390 MreC fusion, by contrast, formed a broad band at midcell, whereas it was largely excluded from the polar  
391 regions (**Figure 9**). In line with the global morphological defects caused by its depletion, MreC may have a  
392 general role in cell wall integrity, but it does not appear to be specifically associated with the polar stalk  
393 biosynthetic machinery.

394 To determine the role of the different scaffolds in polar PG biosynthesis, cells lacking these factors were  
395 subjected to HADA staining after phosphate deprivation (**Figure 10**). Interestingly, despite its severe stalk  
396 elongation defect (**Figure 8**) the  $\Delta bacA$  mutant still displayed intense polar foci, indicating that BacA is an  
397 accessory factor that is not critical for the global reorganization of PG biosynthesis induced under

398 phosphate-limiting conditions. Consistent with this idea, muropeptide analysis showed that deletion of  
399 *bacA* did not have any appreciable effects on global PG composition (**Supplementary file 4**). Depletion of  
400 MreB or RodZ, by contrast, strongly decreased the intensity of the polar HADA signals, and frequently led  
401 to the insertion of cell wall material at pole-distal sites. In both cases, these defects were accompanied by  
402 significant changes in the whole-cell muropeptide profiles. Similar to the  $\Delta sdpAB$  mutant (compare **Sup-**  
403 **plementary file 2**), the degree of crosslinkage was significantly reduced, mostly due to a decrease in the  
404 proportion of highly crosslinked (trimeric and tetrameric) muropeptide species. Moreover, there was a  
405 striking increase in the proportion of muropeptides with tripeptide side chains, indicative of high levels of  
406 LD-TPase activity. Thus, cell wall stress caused by reduced levels of PBP2-mediated DD-transpeptidation  
407 may trigger a fail-safe mechanism that stabilizes the PG meshwork through the formation of abundant 3-  
408 3 crosslinks.

409 Collectively, these results demonstrate that MreB and its transmembrane adapter RodZ play a central role  
410 in the establishment of the polar PG biosynthetic zone that gives rise to the stalk structure.

#### 411 **MreB orchestrates the polar stalk biosynthetic complex**

412 Our data demonstrate that several components of the PG biosynthetic machinery localize to the stalked  
413 pole in phosphate-starved cells, suggesting that they assemble into a complex mediating the synthesis of  
414 stalk PG. To obtain more insight into the factors mediating the recruitment of these proteins, we reanal-  
415 yzed the localization patterns of DipM-mCherry, CrbA-mCherry, Venus-MreB, CFP-RodZ, and BacA-CFP in  
416 all deletion strains that showed defects in stalk elongation ( $\Delta dipM$ ,  $\Delta sdpAB$ ,  $\Delta crbA$ ,  $\Delta ldpA$ , and  $\Delta bacA$ ).  
417 However, in all cases, the positioning of the fusion proteins remained unaffected, indicating that neither  
418 lytic factors nor the bactofilin cytoskeleton are required for complex assembly. Given the prevalence of  
419 elongasome components among the polarly localized proteins, we then tested the role of MreB in the  
420 recruitment process. Treatment of cells with the MreB inhibitor A22 not only led to the delocalization of  
421 the known MreB interactor RodZ but also abolished the polar foci of DipM and CrbA (**Figure 11**). Thus,  
422 MreB appears to be a key organizer of the stalk biosynthetic complex. Notably, A22 had no effect on the  
423 polar localization of BacA, indicating that the bactofilin scaffold acts independently of MreB.

424 To analyze the dynamics of the polar MreB assembly, we aimed to construct a sandwich fusion in which  
425 mCherry was inserted into a surface-exposed loop of the MreB protein (Bendezu et al., 2009) (**Figure 12A**).  
426 A strain carrying the respective allele (*mreB<sup>sw</sup>*) in place of the endogenous *mreB* gene showed normal  
427 growth rates (**Figure 12–figure supplement 1A**). However, in rich medium, cells were shorter and more  
428 highly curved than the wild type and occasionally formed branches and/or filaments. Under phosphate-



429 limiting conditions, by contrast, the distribution of cell lengths was similar to that of the wild-type strain  
430 (**Figure 12–figure supplement 1B**). Strikingly, *mreB<sup>sw</sup>* cells failed to form stalks under both standard and  
431 phosphate-limiting conditions. Consistent with this observation, the fusion protein no longer condensed  
432 into polar foci during phosphate starvation but retained the patchy localization pattern typically observed  
433 in exponentially growing cells (Gitai, Dye, & Shapiro, 2004) (**Figure 12 C and D**). This unusual behavior led  
434 to changes in the global muropeptide profile that were qualitatively similar to those observed for MreB-  
435 and RodZ-depleted cells but considerably less pronounced (**Supplementary file 4**). Consistent with the  
436 slightly aberrant morphology of the mutant cells, this finding suggests that the insertion of mCherry leads  
437 to a mild general defect in MreB function. Importantly, however, it appears to additionally block a specific  
438 set of interactions that are critical for the polar recruitment of MreB, thereby preventing stalk formation.  
439 To our knowledge this is the first report of a *Caulobacter* strain that is completely stalkless under all  
440 growth conditions.

441 Collectively, these results demonstrate that MreB has a key role in the assembly and function of the polar  
442 stalk biosynthetic complex in *Caulobacter*.

443

## 444 Discussion

445 Bacterial cells come in a variety of different shapes, but in most cases the mechanisms generating this  
446 morphological diversity are poorly understood (Young, 2006). This study uses the *Caulobacter* stalk as a  
447 readily amenable model system to investigate the molecular principles underlying the development of  
448 species-specific morphological traits. Previous work has shown that stalk growth is driven by zonal PG  
449 incorporation at the old cell pole (Aaron et al., 2007; Kuru et al., 2012; Schmidt and Stanier, 1966). Initially,  
450 this process was thought to be mediated by FtsZ and mechanistically similar to pre-septal cell elongation  
451 (Divakaruni et al., 2007; Quardokus et al., 1996; Quardokus et al., 2001). However, localization studies  
452 revealed that FtsZ is not detectable at the stalked pole, neither during normal cell cycle progression  
453 (Thanbichler and Shapiro, 2006) nor during phosphate starvation (**Figure 1B**), excluding the divisome as a  
454 relevant player in stalk formation. Other reports implicated MreB and RodZ in stalk growth, suggesting  
455 that the elongasome could have a dual role in both cell body and stalk elongation (Divakaruni et al., 2007;  
456 Wagner et al., 2005). Clarification of this issue is complicated by the fact that the inactivation of factors  
457 with a global role in PG biosynthesis leads to pleiotropic morphological defects. Exploiting the fact that  
458 phosphate starvation suppresses *Caulobacter* cell division while strongly promoting stalk elongation, we  
459 were able to disentangle cell body- and stalk-specific growth processes and specifically identify proteins  
460 involved in the synthesis of stalk PG. Our results indicate that stalk biogenesis is driven by a specialized  
461 biosynthetic complex whose composition and biosynthetic activities are clearly distinct from those of the  
462 generic cell elongation and division machineries.

463 Interestingly, the stalk biosynthetic complex is a hybrid composed of factors typically associated with the  
464 elongasome (MreB, RodZ, RodA, PBP2) or divisome (DipM, SdpA, SdpB, CrbA) (**Figure 13**). The recruitment  
465 of components from the cell elongation machinery may reflect the need to incorporate new cell wall  
466 material into an existing sacculus to drive the elongation of the stalk structure, a process that may be  
467 mechanistically similar to dispersed PG biosynthesis during lateral cell growth. Notably, HADA (**Figure 2A**)  
468 and D-Cysteine (Aaron et al., 2007) labeling clearly indicate that, during stalk growth, newly synthesized  
469 PG is not primarily detected in the basal stalk segment but rather in the adjacent polar regions of the cell  
470 body. This observation suggests that stalk elongation does not occur simply by addition of new material  
471 to the existing stalk template. Instead, it appears to be mediated through expansion of the stalk-proximal  
472 polar cap and its simultaneous remodeling into a new stalk segment, a process reminiscent of the medial  
473 growth and constriction of the PG sacculus during *Caulobacter* cell division. The common requirement for  
474 extensive PG remodeling may explain why the cell division and stalk biosynthetic complexes show a

475 considerable overlap in their autolytic machineries. Interestingly, the importance of some of these shared  
476 components varies substantially between the two complexes. For instance, combined inactivation of the  
477 lytic transglycosylases SdpA and SdpB has no obvious effect on cell division (Zielinska et al., 2017), whereas  
478 it largely abolishes stalk formation, indicating that the functional context of these proteins varies  
479 depending on the process they mediate. It remains to be clarified to what extent the different cell wall  
480 biosynthetic complexes compete for their shared components. Interestingly, during the *Caulobacter* cell  
481 cycle, stalk growth occurs predominantly within a short time window at the transition from dispersed to  
482 medial peptidoglycan biosynthesis (**Figure 2—figure supplement 1**). It is therefore tempting to speculate  
483 that the elongasome and divisome have higher priority in the recruitment of shared factors, thereby  
484 restricting assembly of the stalk biosynthetic complex to phases in which they are not fully active. Overall,  
485 stalk formation clearly demonstrates how the reshuffling of preexisting machinery can serve as a straight-  
486 forward means to generate novel morphological features in bacteria. The striking diversity of cell shapes  
487 observed in certain lineages, such as the alphaproteobacteria, may therefore not be based on major new  
488 additions to the repertoire of cell wall biosynthetic proteins but rather on subtle changes in protein acti-  
489 vities and localization patterns.

490 A key finding of our work is the central role of MreB in the stalk biosynthetic complex. We show that this  
491 cytoskeletal protein condenses at the stalked pole during phosphate starvation and facilitates the polar  
492 recruitment of several other factors that are critical to stalk formation. Notably, our attempts to integrate  
493 mCherry into a surface-exposed loop of MreB led to the serendipitous identification of a *Caulobacter*  
494 strain that was completely devoid of stalks under both phosphate-limiting and -replete conditions. This is  
495 in stark contrast to other mutants described previously, which are stalk-less in rich medium but still  
496 elaborate stalks upon phosphate starvation (Biondi et al., 2006; Bowman et al., 2008; Ebersbach et al.,  
497 2008; Sommer and Newton, 1989), suggesting that they have a defect in the regulation of stalk formation  
498 rather than in the biosynthetic machinery mediating this process. Importantly, cells producing the MreB  
499 sandwich fusion showed only relatively mild general cell shape defects. The region surrounding the  
500 insertion site of mCherry may thus contain determinants that are specifically required for MreB's function  
501 in stalk formation but largely dispensable for elongasome-mediated longitudinal growth of the cell body.  
502 Previous work has shown that the positioning of MreB filaments is strongly influenced by their intrinsic  
503 curvature (Hussain et al., 2018; Ursell et al., 2014), a parameter controlled by the concentration of the  
504 membrane adapter RodZ (Colavin et al., 2018). The high enrichment of the MreB-RodZ complex at the  
505 stalked pole may thus be sufficient to change the architecture of MreB filaments such as to facilitate their

506 interaction with the more highly curved stalked pole. However, the cues promoting the relocation of MreB  
507 from the lateral regions of the cell to the stalked pole still remain unknown.

508 Although MreB clearly has a key role in stalk biogenesis, it is not the only scaffolding protein contributing  
509 to this process. Previous work has shown that the bactofilin BacA is required for proper stalk length {Kühn,  
510 2010 #41}, and our analyses revealed an additional role for this protein in cell body elongation during  
511 phosphate starvation (**Figure 8**). Notably, the *bacA* gene lies in a putative operon with *ldpA*, a gene  
512 encoding a putative LytM-like endopeptidase that also functions in stalk formation. This genetic context  
513 is conserved in a variety of other species, suggesting a functional link between the two gene products  
514 (Jackson et al., 2018; Sycuro et al., 2010). Support for this notion comes from studies in the human  
515 pathogen *Helicobacter pylori*, which demonstrated that both genes in this conserved operon are required  
516 to establish the characteristic helical cell shape of this species (Sycuro et al., 2010). Notably, apart from  
517 its putative interaction with LdpA, *Caulobacter* BacA was shown to recruit a class A PBP (PbpC) involved  
518 in stalk elongation and in the targeting of proteins to the stalk lumen (Hughes et al., 2013; Kühn et al.,  
519 2010). Importantly, the polar localization of BacA was independent of the presence of MreB. The bactofilin  
520 cytoskeleton thus appears to constitute a functionally independent morphogenetic module that has been  
521 coopted by *Caulobacter* to modulate stalk formation. This module appears to act downstream of the  
522 MreB-dependent stalk biosynthetic complex, as it was not able to establish a stalk structure in the absence  
523 of a functional MreB cytoskeleton.

524 The ultimate determinant mediating the polar recruitment of the stalk biosynthetic machinery in *Caulo-*  
525 *bacter* still remains unknown. In *Asticcacaulis excentricus*, a member of the *Caulobacteraceae* that is  
526 characterized by subpolar stalks, the site of stalk formation was shown to be defined by the polarity  
527 determinant SpmX (Jiang et al., 2014). However, despite its conservation, this protein is not required for  
528 proper stalk localization in *Caulobacter* cells (Radhakrishnan et al., 2008). Notably, deletion of SpmX or  
529 transfer of the cells to phosphate-limited media restores polar stalk growth in *A. excentricus* (Jiang et al.,  
530 2014), suggesting that the pathway observed in *Caulobacter* is still present in this species but normally  
531 obscured by the the action of the newly coopted localization factor SpmX. It will be interesting to see  
532 whether the *A. excentricus* SpmX homolog organizes an alternative stalk biosynthetic complex or simply  
533 recruits the polar machinery to a pole-distal position.

534 Although the functionality and localization of the peptidoglycan biosynthetic machinery changes drasti-  
535 cally upon transition of *Caulobacter* cells from phosphate-replete to phosphate-limiting media, the overall  
536 composition of their PG layer remains largely unaffected. This finding is unexpected because significant

537 changes in both glycan chain lengths and the degree of cross-linking were observed in other species in  
538 response to changes in their growth conditions (Vollmer et al., 2008). However, analyzing the muro-  
539 peptide profiles of isolated stalk and cell body fractions, we identified clear differences between these  
540 two compartments that are likely obscured in whole-cell analyses due to the small contribution of stalks  
541 to the total cellular PG content. Most importantly, stalk PG showed a significantly higher degree of  
542 crosslinkage, which was mostly due to a higher frequency of 3-3 crosslinks, indicative of elevated LD-TPase  
543 activity. The precise reason for this difference remains unclear. It is conceivable that the LD-TPases LdtD  
544 and LdtX are part of the polar stalk biosynthetic complex and, thus, preferentially act on newly synthesized  
545 PG produced by this machinery. However, localization studies did not give any evidence for an enrichment  
546 of these proteins at the stalked pole. An alternative explanation may be provided by the observation that  
547 the turnover rate of PG is significantly lower in the stalk than in the cell body. Thus, LD-TPases may act  
548 uniformly throughout the entire cell envelope, but most of the 3-3 crosslinks formed in the cell body may  
549 be lost as a consequence of PG remodeling, whereas those in the stalk are retained over prolonged periods  
550 of time. Notably, peptides with 3-3 crosslinks are stiffer than those with 3-4 crosslinks and adopt a more  
551 extended conformation that is better suited to connect glycan strands in stressed PG (de Pedro and Cava,  
552 2015). Their increased frequency may therefore help to modulate the mechanical properties of the stalk  
553 and render it more resistant to bending or breakage under conditions of high laminar flow (Klein et al.,  
554 2013; Persat et al., 2014)

555 Collectively, our study shows that, in *Caulobacter*, multiple cell-wall biosynthetic machineries act in  
556 concert to generate stalks of proper size and stability, thereby ensuring optimal performance of this  
557 cellular structure in the environmental context. It will be interesting to see how the nature and the  
558 regulation of these components have changed during evolution to bring about the large variety of mor-  
559 phologies found in other stalked members of the alphaproteobacterial lineage.

560

## 561 **Materials and Methods**

### 562 **Media and growth conditions**

563 *Caulobacter* strains (Evinger and Agabian, 1977) were grown at 28°C in peptone-yeast-extract (PYE)  
564 medium (Poindexter, 1964), supplemented with antibiotics at the following concentration when appro-  
565 priate ( $\mu\text{g ml}^{-1}$ ; liquid/solid medium): spectinomycin (25/50), streptomycin (-/5), gentamicin (0.5/5),  
566 kanamycin (5/25), chloramphenicol (1/1). Gene expression from the *xylX* promoter (Pxyl) or *vanA*  
567 promoter (Pvan), was induced by supplementation of the media with 0.3% D-xylose and 0.5 mM sodium  
568 vanillate, respectively, prior to analysis of the cells. To induce phosphate starvation, stationary cells were  
569 diluted 1:20 in M2G<sup>P</sup> medium (Kühn et al., 2010) and incubated at 28°C for the indicated times. In case of  
570 the conditional *mreB*, *rodZ*, and *mreC* mutants, cells were grown to exponential phase ( $\text{OD}_{600} \sim 0.5$ ) in PYE  
571 medium supplemented with xylose, washed three times, and then resuspended to an  $\text{OD}_{600}$  of 0.05 in  
572 inducer-free medium. The cultures were then grown for 7 h to achieve protein depletion, diluted (1:20)  
573 in M2G<sup>P</sup> medium, and cultivated for additional 24 h before analysis. The conditional *amiC* and *dipM*  
574 mutants were treated in a similar fashion, with 12 h of cultivation in PYE medium prior to transfer into  
575 M2G<sup>P</sup>. The synchronization of *Caulobacter* was achieved by density gradient centrifugation using Percoll  
576 (Sigma-Aldrich) (Tsai and Alley, 2001). To determine the viable-cell count in cultures, various dilutions of  
577 the cell suspensions were spread on PYE plates, and the number of colony-forming units (CFU) was  
578 determined after three days of incubation at 28 °C. *E. coli* strain TOP10 (Invitrogen) and its derivatives  
579 were cultivated at 37°C in LB broth (Karl Roth, Germany). Antibiotics were added at the following concen-  
580 trations ( $\mu\text{g/ml}$ ; liquid/solid medium): spectinomycin (50/100), gentamicin (15/20), kanamycin (30/50),  
581 chloramphenicol (20/30).

### 582 **Plasmid and strain construction**

583 The bacterial strains, plasmids, and oligonucleotides used in this study are listed in **Supplementary file 5**.  
584 *E. coli* TOP10 (Invitrogen) was used as host for cloning purposes. All plasmids were verified by DNA  
585 sequencing. *Caulobacter* was transformed by electroporation. Non-replicating plasmids were integrated  
586 into the *Caulobacter* chromosome by single-homologous recombination at the *xylX* (Pxyl) or *vanA* (Pvan)  
587 locus (Thanbichler et al., 2007). Gene replacement was achieved by double-homologous recombination  
588 using the counter-selectable *sacB* marker (M.R.K. Alley, unpublished) (Thanbichler & Shapiro, 2006).  
589 Proper chromosomal integration or gene replacement was verified by colony PCR.

## 590 **Growth curves**

591 Cells were grown to exponential phase in PYE medium, harvested by centrifugation, and resuspended in  
592 the same medium to an OD<sub>600</sub> of 0.05. The suspensions were then transferred to 24-well polystyrene  
593 microtiter plates (Becton Dickinson Labware), incubated at 32°C with double-orbital shaking in an Epoch 2  
594 microplate reader (BioTek, Germany), and analyzed photometrically (OD<sub>600</sub>) at 15 min intervals.

## 595 **Light and immunofluorescence microscopy**

596 For light microscopic analysis, cells were transferred onto pads made of 1% agarose. Images were taken  
597 with an Axio Observer.Z1 (Zeiss) microscope equipped with a Plan Aplanachromat 100x/1.45 Oil DIC and a  
598 Plan Aplanachromat 100x/1.4 Oil Ph3 phase contrast objective, an ET-mCherry filter set (Chroma, USA), and  
599 a pco.edge sCMOS camera (PCO). Images were recorded with VisiView 3.3.0.6 (Visitron Systems,  
600 Germany) and processed with Metamorph 7.7.5 (Universal Imaging Group, USA) and Illustrator CS6  
601 (Adobe Systems, USA). To generate demographs, fluorescence intensity profiles were measured with  
602 ImageJ 1.47v (<http://imagej.nih.gov/ij>). The data were then processed in R version 3.5.0 (Team, 2012)  
603 using the Cell Profiles script (<http://github.com/ta-calem/Cell-Profiles>) (Cameron et al., 2014). Box and  
604 violin plots for the statistical analysis of imaging data were generated in R version 3.5.0 using the ggplot2  
605 (Wickham, 2009) and Reshape2 (Wickham, 2007) packages, respectively.

## 606 **Electron microscopy**

607 10 µl cell suspension were applied to an electron microscopy grid (Formvar/Carbon Film on 300 Mesh  
608 Copper; Plano GmbH, Germany) and incubated for 1 min at room temperature. Excess liquid was removed  
609 with Whatman filter paper. Subsequently, the cells were negatively stained for 5 sec with 5 µl of 1% uracyl  
610 acetate. After three washes with H<sub>2</sub>O, the grids were dried, stored in an appropriate grid holder, and  
611 analyzed in a 100 kV JEM-1400 Plus transmission electron microscope (JEOL, USA).

## 612 **Western blot analysis**

613 Western blot analysis was performed as described (Thanbichler and Shapiro, 2006), using anti-CtrA  
614 (Domian et al., 1997), anti-FtsZ (Goley et al., 2010), anti-MipZ (Thanbichler and Shapiro, 2006), anti-DnaA  
615 (Collier et al., 2006), or anti-SpmX (Radhakrishnan et al., 2008) at dilutions of 1:10,000 (anti-CtrA, anti-  
616 FtsZ, anti-MipZ, and anti-DnaA), and 1:50,000 (anti-SpmX). Goat anti-rabbit immunoglobulin G conjugated  
617 to horseradish peroxidase (Perkin Elmer, USA) was used as secondary antibody. Immunocomplexes were  
618 detected using the Western Lightning Plus-ECL chemiluminescence reagent (Perkin Elmer, USA). Signals  
619 were recorded with a ChemiDoc MP imaging system (Bio-Rad) and analyzed using the Image Lab 5.0  
620 software (Bio-Rad).

621 **HADA staining**

622 HADA-staining experiments were conducted as described (Kuru et al., 2012). Briefly, 50 µl of a culture  
623 were incubated for 2 min with 0.5 mM HADA. The cells were then fixed by addition of ice-cold ethanol to  
624 a concentration of 70% and incubated at 4°C for 20 min. Subsequently, they were washed three times  
625 with PBS and subjected to fluorescence microscopic analysis. For chase experiments, phosphate-starved  
626 *Caulobacter* cells were grown for 90 min in the presence of 0.5 mM HADA. The cells were washed three  
627 times with M2G<sup>-P</sup> medium, resuspended in fresh M2G<sup>-P</sup> medium, and further cultivated for the indicated  
628 time intervals. Cells were fixed and washed as described above prior to imaging.

629 **Bioinformatic analysis**

630 Protein sequences containing the indicated domains were retrieved from the UniProt Knowledgebase  
631 (The Uniprot Consortium, 2017). Their overall domain composition was determined using the SMART  
632 server (Letunic et al., 2015). The prediction of protein localization and membrane topology was performed  
633 with Signal-BLAST (Frank and Sippl, 2008) and TMHMM (Krogh et al., 2001), respectively.

634 **Flow cytometry**

635 Cultures were grown in the indicated media and supplemented with 20 µg/ml rifampicin 3 h prior to  
636 analysis to block the re-initiation of chromosome replication. At the indicated time points, cells were  
637 diluted to an OD<sub>600</sub> of 0.1-0.2, incubated for 25 min under vigorous shaking with the DNA-specific  
638 fluorescent dye Hoechst 33342 (10 µM; ThermoFischer, Germany), and fixed by addition of ethanol to a  
639 final concentration of 70%. Subsequently, the suspensions were analyzed by flow cytometry in a  
640 customized Fortessa Flow Cytometer (BD Biosciences), using the UV 440/40 nm channel. Data were  
641 acquired with FACSdiva 8.0 (BD Biosciences) and processed with FlowJo v10 (FlowJo LLC).

642 **Peptidoglycan analysis**

643 For whole-cell analyses, cultures were rapidly cooled to 4 °C and harvested by centrifugation at 16,000  
644 rpm for 30 min. The cells were resuspended in 6 ml of ice-cold H<sub>2</sub>O and added dropwise to 6 ml of a boiling  
645 solution of 8% sodium dodecylsulfate (SDS) that was stirred vigorously. After 30 min of boiling, the  
646 suspension was cooled to room temperature. Peptidoglycan was isolated from the cell lysates as  
647 described previously (Glauner, 1988) and digested with the muramidase cellosyl (kindly provided by  
648 Hoechst, Frankfurt, Germany). The resulting muropeptides were reduced with sodium borohydride and  
649 separated by HPLC following an established protocol (Bui et al., 2009; Glauner, 1988). The identity of  
650 eluted fragments was assigned based on the retention times of known muropeptides from *Caulobacter*  
651 (Takacs et al., 2013).



652 To prepare stalk and cell body fractions, 100 ml cultures grown in M2G<sup>-P</sup> medium were rapidly cooled to  
653 4 °C and harvested by centrifugation at 16,000 rpm for 30 min. After resuspension in M2G<sup>-P</sup> medium, the  
654 cells were vigorously agitated for 2 min at maximum speed in a kitchen blender. The suspension was sub-  
655 mitted to three rounds of centrifugation at 9,000 rpm and 4 °C. The supernatants (stalk fraction) and the  
656 first pellet (cell body fraction) were collected separately and kept in ice. The stalk fraction was subjected  
657 to an additional centrifugation step at 10,000 rpm and 4 °C to remove residual cell bodies and cell debris.  
658 Subsequently, stalks were collected by centrifugation at 20,000 rpm and 4 °C for 30 min, resuspended in  
659 3 ml ice-cold H<sub>2</sub>O, added dropwise to 3 ml of a boiling 8% SDS solution, and then further processed as  
660 described above to isolate stalk PG. The isolation of cell body PG was achieved as described for whole-cell  
661 samples.

## 662 **Acknowledgements**

663 We thank Julia Rosum (University of Marburg) and Lisa Atkinson (Newcastle University) for excellent  
664 technical assistance. Moreover, we acknowledge Andrea Möll and Aleksandra Zielinska for support in the  
665 initial phases of this work and Manuel Osorio Valeriano and Maria Perez Burgos for help with the  
666 transmission electron microscopic analyses. This work was supported by intramural funds from Philipps-  
667 Universität Marburg (to M.T.), a Max Planck Fellowship from the Max Planck Society (to M.T.), a Young  
668 Investigator Grant (RGY0076/2013-C104) from the Human Frontier Science Program (to M.T.), a grant  
669 from the Wellcome Trust (101824/Z/13/Z; to W.V.), and funds from the German Research Foundation  
670 (DFG) granted in the context of the Collaborative Research Center “*Microbial Diversity in Environmental*  
671 *Signal Response*” (SFB 987; to M.T.).

## 672 **Figure legends**

673 **Figure 1. Progressive arrest of DNA replication and cell division under phosphate starvation.** (A) DNA  
674 content of *C. crescentus* wild-type cells grown in PYE (rich medium, exponential phase), M2G (minimal  
675 medium, exponential phase), and M2G<sup>-P</sup> (phosphate-lacking medium) for 12 h and 24 h. Cells were treated  
676 with 20 µg ml<sup>-1</sup> rifampicin to prevent the reinitiation of replication prior to analysis by flow cytometry. (B)  
677 Subcellular localization of GFP-ParB and FtsZ-YFP in cells of strains MT199 (Pvan::Pvan-*ftsZ-yfp*) and  
678 MT174 (*parB::gfp-parB*) after 24 h of cultivation in M2G<sup>-P</sup> medium. Synthesis of FtsZ-YFP was induced by  
679 addition of 50 µM vanillate 3 h prior to analysis (scale bar: 3 µm). (C) Changes in the levels of CtrA, DnaA,  
680 FtsZ, and MipZ over the course of phosphate starvation. Wild-type cells were grown in PYE, transferred  
681 into M2G<sup>-P</sup> medium and subjected to Western blot analysis after 6 h, 12 h, and 24 h of incubation. A  
682 Western blot detecting SpmX served as a loading control. (D) Changes in the optical density (OD<sub>600</sub>) and  
683 viable-cell counts (CFU/ml) after transfer of a wild-type culture to M2G<sup>-P</sup> medium.

684 **Figure 2. Reorganization of cell wall biosynthesis in the absence of phosphate.** (A) Major growth zones  
685 of phosphate-starved wild-type cells. Cells were cultivated in M2G<sup>-P</sup> medium for 6 h or 24 h and exposed  
686 to a short (2 min) pulse of HADA. The subcellular distribution of the fluorescence signals was quantified  
687 by demographic analysis of a random subpopulation of cells (n=200). To generate the graphs, single-cell  
688 fluorescence profiles were sorted according to cell length and stacked on top of each other (scale bars:  
689 3 µm). (B) Changes in stalk and cell body lengths during phosphate starvation. Wild-type cells were  
690 incubated in M2G<sup>-P</sup> medium for 8 h, 18 h, 28 h, and 40 h prior to imaging. The data are shown as box  
691 plots, with the horizontal line indicating the median, the box the interquartile range, and the whiskers the  
692 2<sup>th</sup> and 98<sup>th</sup> percentile (0 h: n=210, 8 h: n=209, 28 h: n=208) (\*\*\*) p < 10<sup>-6</sup>; t-test). (C and D) Slow turnover  
693 of PG in the stalk compartment. Cells were cultivated in M2G<sup>-P</sup> medium for 18 h and exposed to HADA for  
694 an extended period of time (1.5 h). Subsequently, they were washed, transferred into fresh in M2G<sup>-P</sup>  
695 medium and grown for 2 h, 4 h, and 6 h in the absence of the label (scale bars: 3 µm). To quantify the  
696 changes in HADA fluorescence overtime, fluorescence profiles were obtained from random sub-  
697 populations of cells (n=200 per time point). The lengths of the profiles in each quintile of the cell length  
698 distribution were normalized to the maximum cell length in the respective quintile. Subsequently, the  
699 fluorescence intensities were averaged and used to generate violin plots. Shown is a representative part  
700 of the data depicting the fluorescence distributions in the fourth quintile at each of the time points (D).  
701 The full analysis is presented in [Figure 1–figure supplement 2C](#).

702 **Figure supplement 1.** HADA incorporation in wild-type cells in the presence of phosphate.

703 **Figure supplement 2.** Changes in HADA incorporation during transition to phosphate starvation.

704 **Figure 3. Differential composition of cell body and stalk peptidoglycan.** Shown are the HPLC profiles of  
705 muuropeptides obtained from the cell body and stalk fractions of strains NA1000 (WT) and AZ138 ( $\Delta ldtD$   
706  $\Delta ldtX$ ) after growth in M2G<sup>-P</sup> medium for 24 h. In the first panel, the identities of the most abundant  
707 muuropeptides are given in black. In the second panel, products that are specifically enriched in the stalk  
708 fraction are indicated in red. Abbreviations: Tri: GlcNAc–MurNAc(r)–L-Ala–D-Glu–mDap; Tetra: GlcNAc–  
709 MurNAc(r)–L-Ala–D-Glu–mDap–D-Ala; Penta: GlcNAc–MurNAc(r)–L-Ala–D-Glu–mDap–D-Ala–D-Ala; Anh:  
710 1,6-anhydro-MurNAc; DD: mDap–D-Ala cross-link; LD: mDap–mDap crosslink.

711 **Figure supplement 1.** Visualization of isolated stalk and cell body fractions.

712 **Figure 4. Participation of PG biosynthetic enzymes in stalk elongation. (A)** Localization of GFP-PBP2  
713 fusion in strain MAB244 (*pbp2::gfp-pbp2*) after 24 h of cultivation in M2G<sup>-P</sup>. The demograph shows the  
714 fluorescence profiles of a random subpopulation of cells sorted according to cell length (n=227). **(B)**  
715 Distribution of the stalk lengths in populations of mutants lacking specific PG synthases. Shown are the  
716 results obtained for MT286 ( $\Delta pbpC$ ), JK305 ( $\Delta pbpA1 \Delta pbpC \Delta pbpY \Delta pbpZ$ ), KK1 ( $\Delta pbpX$ ), KK12 ( $\Delta pbp1A$   
717  $\Delta pbpY \Delta pbpZ$ ), AZ137 ( $\Delta ldtD$ ), AZ138 ( $\Delta ldtDX$ ), and AZ140 ( $\Delta ldtX$ ) after 24 h of growth in M2G<sup>-P</sup> medium.  
718 Data are represented as box plots, with the horizontal line indicating the median, the box the interquartile  
719 range and the whiskers the 2<sup>nd</sup> and the 98<sup>th</sup> percentile (n=210 per strain). In addition rotated kernel density  
720 plots (grey) are depicted for each dataset to indicate the distribution of the raw data (\*\*\*) p < 10<sup>-6</sup>; t-test).

721 **Figure supplement 1.** Role of PG synthases in stalk elongation under phosphate starvation.

722 **Figure 5. Participation of autolytic factors in stalk elongation. (A)** Domain structure of selected compon-  
723 ents of the autolytic machinery of *C. crescentus*. **(B)** DIC micrographs of mutant cells exhibiting a stalk  
724 elongation defect. Shown are strains MT258 ( $\Delta dipM$ ), AZ22 ( $\Delta sdpAB$ ), AM376 ( $\Delta crbA$ ), and AM364 ( $\Delta ldpA$ )  
725 in comparison to NA1000 (WT) after 24 h of cultivation in M2G<sup>-P</sup> medium. **(C)** Distribution of the cell body  
726 and stalk lengths in populations of strains MT258, AZ22, AM376, and AM364 after growth in M2G<sup>-P</sup> for 24  
727 h. The values obtained are shown as box plots, with the horizontal line indicating the median, the box the  
728 interquartile range and the whiskers the 2<sup>nd</sup> and the 98<sup>th</sup> percentile (n=210 per strain). In addition rotated  
729 kernel density plots (grey) are depicted for each dataset to indicate the distribution of the raw data (\*\*\*)  
730 p < 10<sup>-6</sup>; t-test).

731 **Figure supplement 1.** Role of autolytic enzymes in stalk elongation under phosphate starvation.

732 **Figure supplement 2.** Transmission electron micrographs of mutants lacking autolytic enzymes.

733 **Figure 6. Localization of autolytic factors in phosphate-starved cells.** Shown are the localization patterns  
734 of SdpA-mCherry (AM480, P<sub>xyl</sub>::P<sub>xyl</sub>-sdpA-mCherry), CrbA-mCherry (MAB247, P<sub>xyl</sub>::P<sub>xyl</sub>-crbA-mCherry),  
735 DipM-mCherry (AM208, P<sub>xyl</sub>::P<sub>xyl</sub>-dipM-mCherry), and SdpB-mCherry (AZ127, P<sub>xyl</sub>::P<sub>xyl</sub>-sdpB-mCherry)  
736 in cells cultivated for 24 h in M2G<sup>-P</sup> medium (scale bars: 3 μm). Synthesis of the fluorescent protein fusions  
737 was induced for 3 h (for DipM, SdpA, and CrbA) or 2 h (for SdpB) with 0.3% xylose prior to analysis. The  
738 demographs next to the images show the fluorescence profiles of a random subpopulation of cells sorted  
739 according to cell length (n=200 for each strain).

740 **Figure supplement 1.** Stability of fluorescent protein fusions.

741 **Figure 7. Cell wall biosynthesis in mutants with defects in the autolytic machinery.** Shown are fluores-  
742 cence images of strains NA1000 (WT), MT258 ( $\Delta dipM$ ), AZ22 ( $\Delta sdpAB$ ), AM376 ( $\Delta crbA$ ), and AM364  
743 ( $\Delta ldpA$ ) grown in M2G<sup>-P</sup> for 24 h prior to HADA staining (2 min). The distribution of the fluorescence signals  
744 was quantified by demographic analysis of a random subpopulation of cells (n=200 for each strain) (scale  
745 bars: 3 μm).

746 **Figure 8. Role of scaffolding proteins in stalk elongation. (A)** DIC images of cells lacking single scaffolding  
747 proteins. The strains analyzed were LS4275 ( $\Delta mreC$  P<sub>xyl</sub>::P<sub>xyl</sub>-mreC), LS3809 ( $\Delta mreB$  P<sub>xyl</sub>::P<sub>xyl</sub>-mreB),  
748 CJW2747 ( $\Delta rodZ::\Omega$  P<sub>xyl</sub>::P<sub>xyl</sub>-rodZ), MT257 ( $\Delta bacA$ ). Strain NA1000 (WT) is shown as a wild-type control.  
749 Strains LS4275, LS3809, and CJW2747 were grown to exponential phase PYE medium containing the  
750 inducer xylose. Subsequently, the cells were washed, grown for another 7 h in PYE medium with or  
751 without inducer and then incubated for 24 h in M2G<sup>-P</sup> medium with or without inducer prior to imaging  
752 by DIC microscopy. Strain MT257 was grown to stationary phase in PYE medium, diluted (1:20) into M2G<sup>-P</sup>  
753 medium, and grown for 24 h prior to analysis. Strain NA1000 (WT) was grown in M2G<sup>-P</sup> medium. After 9 h,  
754 the cultures were supplemented with A22 at a final concentration of 10 μg/ml and incubated for  
755 additional 15 h prior to imaging (scale bar: 3 μm). **(B)** Distribution of cell body and stalk lengths in  
756 populations of WT NA1000 and depleted strains LS4275, LS3809, CJW2747, and MT257 grown as  
757 described in (A). The data are shown as box plots, with the horizontal line indicating the median, the box  
758 the interquartile range and the whiskers the 2<sup>nd</sup> and the 98<sup>th</sup> percentile (n=210 per strain). In addition  
759 rotated kernel density plots (grey) are depicted for each dataset to indicate the distribution of the raw  
760 data (\*\*\*)  $p < 10^{-6}$ ; t-test).

761 **Figure supplement 1.** Transmission electron micrographs of mutants lacking scaffolding proteins.

762 **Figure 9. Localization of scaffolding proteins in phosphate-starved cells.** Shown is the localization of  
763 MreC-mCherry (MAB223, P<sub>xyl</sub>::P<sub>xyl</sub>-*mreC-mCherry*), CFP-RodZ (CJW2745, *rodZ::cfp-rodZ*), Venus-MreB  
764 (MT309, P<sub>xyl</sub>::P<sub>xyl</sub>-*venus-mreB*), and BacA-CFP (MT260, *bacA::bacA-cfp*) in cells cultivated for 24 h in  
765 M2G<sup>-P</sup> medium (scale bars: 3 μm). Synthesis of the fluorescent protein fusions was induced with 0.3%  
766 xylose 3 h prior to analysis. The population-wide distribution of fluorescence signals was quantified by  
767 demographic analysis of random subpopulations of cells (n=200 for each strain).

768 **Figure 10. Cell wall biosynthesis in mutants lacking single scaffolding proteins.** Shown are fluorescence  
769 images of strains LS3809 ( $\Delta$ *mreB* P<sub>xyl</sub>::P<sub>xyl</sub>-*mreB*), and CJW2747 ( $\Delta$ *rodZ::Ω* P<sub>xyl</sub>::P<sub>xyl</sub>-*rodZ*) cultivated as  
770 described in **Figure 8A** prior to HADA staining (2 min). The population-wide distribution of HADA fluor-  
771 escence was quantified by demographic analysis (n=200 for each strain) (scale bars: 3 μm).

772 **Figure 11. Role of MreB in the polar recruitment of factors involved in stalk formation.** Shown are  
773 fluorescence images of strains AM208 (P<sub>xyl</sub>::P<sub>xyl</sub>-*dipM-mCherry*), CJW2745 (*rodZ::cfp-rodZ*), MAB247  
774 (P<sub>xyl</sub>::P<sub>xyl</sub>-*crbA-mCherry*), MT309 (P<sub>xyl</sub>::P<sub>xyl</sub>-*venus-mreB*) and MT260 (*bacA::bacA-cfp*). Cells were grown  
775 in PYE medium, diluted into M2G<sup>-P</sup> medium, and incubated for 23 h. Subsequently, A22 (10 μg/ml) was  
776 added to the media, and cultivation was continued for 1 h prior to imaging. Strains AM208, MAB247, and  
777 MT309 were induced for 3 h with 0.3% xylose to induce synthesis of the fusion proteins before analysis  
778 (scale bars: 3 μm).

779 **Figure 12. Abolishment of stalk formation in a strain producing an MreB sandwich fusion.** (A) Schematic  
780 representation of the *mreb*<sup>sw</sup> allele. (B) Structure of *Caulobacter* MreB (PDB accession 4CZM; (van den Ent  
781 et al., 2014)). The inset shows the site used to insert the mCherry tag. (C) DIC and fluorescence images of  
782 strain MAB238 (*mreB::mreB*<sup>sw</sup>) grown to exponential phase in PYE medium or incubated for 24 h in M2G<sup>-P</sup>  
783 medium (scale bars: 3 μm). The demographs on the right display the distribution of mCherry fluorescence  
784 in random subpopulations of cells (n=210). (D) Transmission electron micrograph of MAB238 cells after  
785 24 h of growth in M2G<sup>-P</sup> medium and staining with uranyl acetate (2%) (scale bar: 2 μm).

786 **Figure supplement 1.** Growth characteristics of a strain producing an MreB-mCherry sandwich fusion.

787 **Figure 13. Model of the factors contributing to stalk formation.** The actin homolog MreB forms the basis  
788 of the stalk biosynthetic complex and mediates the recruitment of both synthetic and lytic proteins to the  
789 stalked pole. The bactofilin BacA contributes to stalk biosynthesis but is not essential to this process. In  
790 addition to the proteins that are stably associated with the cell pole, diffusible periplasmic enzymes are

791 transiently associated with the polar machinery or non-selectively trapped in the compartments  
792 generated by the crossbands.

793

#### 794 **Additional files**

- 795 • **Supplementary file 1.** Composition of cell body and stalk peptidoglycan from crossband- and LD-  
796 transpeptidase-deficient cells.
- 797 • **Supplementary file 2.** List of mutant strains analyzed for stalk defects.
- 798 • **Supplementary file 3.** Composition of peptidoglycan isolated from autolysin-deficient cells.
- 799 • **Supplementary file 4.** Composition of peptidoglycan from cells with defects in scaffolding proteins.
- 800 • **Supplementary file 5.** Strains, plasmids and oligonucleotides.

## 801 **References**

- 802 Aaron, M., Charbon, G., Lam, H., Schwarz, H., Vollmer, W., & Jacobs-Wagner, C. (2007). The tubulin  
803 homologue FtsZ contributes to cell elongation by guiding cell wall precursor synthesis in *Caulobacter*  
804 *crescentus*. *Mol Microbiol* 64, 938-952. doi:10.1111/j.1365-2958.2007.05720.x
- 805 Alyahya, S. A., Alexander, R., Costa, T., Henriques, A. O., Emonet, T., & Jacobs-Wagner, C. (2009). RodZ, a  
806 component of the bacterial core morphogenic apparatus. *Proc Natl Acad Sci U S A* 106, 1239-1244.  
807 doi:10.1073/pnas.0810794106
- 808 Bendezu, F. O., Hale, C. A., Bernhardt, T. G., & de Boer, P. A. (2009). RodZ (YfgA) is required for proper  
809 assembly of the MreB actin cytoskeleton and cell shape in *E. coli*. *EMBO J* 28, 193-204.  
810 doi:10.1038/emboj.2008.264
- 811 Biondi, E. G., Skerker, J. M., Arif, M., Prasol, M. S., Perchuk, B. S., & Laub, M. T. (2006). A phosphorelay  
812 system controls stalk biogenesis during cell cycle progression in *Caulobacter crescentus*. *Mol*  
813 *Microbiol* 59, 386-401. doi:10.1111/j.1365-2958.2005.04970.x
- 814 Bowman, G. R., Comolli, L. R., Zhu, J., Eckart, M., Koenig, M., Downing, K. H., . . . Shapiro, L. (2008). A  
815 polymeric protein anchors the chromosomal origin/ParB complex at a bacterial cell pole. *Cell* 134,  
816 945-955. doi:10.1016/j.cell.2008.07.015
- 817 Bui, N. K., Gray, J., Schwarz, H., Schumann, P., Blanot, D., & Vollmer, W. (2009). The peptidoglycan  
818 sacculus of *Myxococcus xanthus* has unusual structural features and is degraded during glycerol-  
819 induced myxospore development. *J Bacteriol* 191, 494-505. doi:10.1128/JB.00608-08
- 820 Cameron, T. A., Anderson-Furgeson, J., Zupan, J. R., Zik, J. J., & Zambryski, P. C. (2014). Peptidoglycan  
821 synthesis machinery in *Agrobacterium tumefaciens* during unipolar growth and cell division. *MBio* 5,  
822 e01219-01214. doi:10.1128/mBio.01219-14
- 823 Colavin, A. Shi, H., Huang, K. C. (2018) RodZ modulates geometric localization of the bacterial actin MreB  
824 to regulate cell shape. *Nat Commun* 9, 1280.
- 825 Collier, J. (2012). Regulation of chromosomal replication in *Caulobacter crescentus*. *Plasmid* 67, 76-87.  
826 doi:10.1016/j.plasmid.2011.12.007
- 827 Collier, J., Murray, S. R., & Shapiro, L. (2006). DnaA couples DNA replication and the expression of two  
828 cell cycle master regulators. *EMBO J* 25, 346-356. doi:10.1038/sj.emboj.7600927
- 829 Contreras-Martel, C., Martins, A., Ecobichon, C., Trindade, D. M., Mattei, P. J., Hicham, S., . . . Dessen, A.  
830 (2017). Molecular architecture of the PBP2-MreC core bacterial cell wall synthesis complex. *Nat*  
831 *Commun* 8, 776. doi:10.1038/s41467-017-00783-2
- 832 Curtis, P. D., & Brun, Y. V. (2010). Getting in the loop: regulation of development in *Caulobacter*  
833 *crescentus*. *Microbiol Mol Biol Rev* 74, 13-41. doi:10.1128/MMBR.00040-09
- 834 Daniel, R. A., & Errington, J. (2003). Control of cell morphogenesis in bacteria: two distinct ways to make  
835 a rod-shaped cell. *Cell* 113, 767-776.
- 836 de Pedro, M. A., & Cava, F. (2015). Structural constraints and dynamics of bacterial cell wall architecture.  
837 *Front Microbiol* 6, 449. doi:10.3389/fmicb.2015.00449
- 838 den Blaauwen, T., de Pedro, M. A., Nguyen-Disteche, M., & Ayala, J. A. (2008). Morphogenesis of rod-  
839 shaped sacculi. *FEMS Microbiol Rev* 32, 321-344. doi:10.1111/j.1574-6976.2007.00090.x
- 840 Divakaruni, A. V., Baida, C., White, C. L., & Gober, J. W. (2007). The cell shape proteins MreB and MreC  
841 control cell morphogenesis by positioning cell wall synthetic complexes. *Mol Microbiol* 66, 174-188.  
842 doi:10.1111/j.1365-2958.2007.05910.x



- 843 Divakaruni, A. V., Loo, R. R., Xie, Y., Loo, J. A., & Gober, J. W. (2005). The cell-shape protein MreC  
844 interacts with extracytoplasmic proteins including cell wall assembly complexes in *Caulobacter*  
845 *crescentus*. *Proc Natl Acad Sci U S A* 102, 18602-18607. doi:10.1073/pnas.0507937102
- 846 Domian, I. J., Quon, K. C., & Shapiro, L. (1997). Cell type-specific phosphorylation and proteolysis of a  
847 transcriptional regulator controls the G1-to-S transition in a bacterial cell cycle. *Cell*, 90, 415-424.
- 848 Dominguez-Escobar, J., Chastanet, A., Crevenna, A. H., Fromion, V., Wedlich-Soldner, R., & Carballido-  
849 Lopez, R. (2011). Processive movement of MreB-associated cell wall biosynthetic complexes in  
850 bacteria. *Science* 333, 225-228. doi:10.1126/science.1203466
- 851 Du, S., & Lutkenhaus, J. (2017). Assembly and activation of the *Escherichia coli* divisome. *Mol Microbiol*  
852 105, 177-187. doi:10.1111/mmi.13696
- 853 Dye, N. A., Pincus, Z., Theriot, J. A., Shapiro, L., & Gitai, Z. (2005). Two independent spiral structures  
854 control cell shape in *Caulobacter*. *Proc Natl Acad Sci U S A* 102, 18608-18613.  
855 doi:10.1073/pnas.0507708102
- 856 Ebersbach, G., Briegel, A., Jensen, G. J., & Jacobs-Wagner, C. (2008). A self-associating protein critical for  
857 chromosome attachment, division, and polar organization in *Caulobacter*. *Cell* 134, 956-968.  
858 doi:10.1016/j.cell.2008.07.016
- 859 Egan, A. J., Cleverley, R. M., Peters, K., Lewis, R. J., & Vollmer, W. (2017). Regulation of bacterial cell wall  
860 growth. *FEBS J* 284, 851-867. doi:10.1111/febs.13959
- 861 Evinger, M., & Agabian, N. (1977). Envelope-associated nucleoid from *Caulobacter crescentus* stalked  
862 and swarmer cells. *J Bacteriol* 132, 294-301.
- 863 Fenton, A. K., & Gerdes, K. (2013). Direct interaction of FtsZ and MreB is required for septum synthesis  
864 and cell division in *Escherichia coli*. *EMBO J* 32, 1953-1965. doi:10.1038/emboj.2013.129
- 865 Figge, R. M., Divakaruni, A. V., & Gober, J. W. (2004). MreB, the cell shape-determining bacterial actin  
866 homologue, co-ordinates cell wall morphogenesis in *Caulobacter crescentus*. *Mol Microbiol* 51, 1321-  
867 1332. doi:10.1111/j.1365-2958.2003.03936.x
- 868 Frank, K., & Sippl, M. J. (2008). High-performance signal peptide prediction based on sequence  
869 alignment techniques. *Bioinformatics* 24, 2172-2176. doi:10.1093/bioinformatics/btn422
- 870 Garner, E. C., Bernard, R., Wang, W., Zhuang, X., Rudner, D. Z., & Mitchison, T. (2011). Coupled,  
871 circumferential motions of the cell wall synthesis machinery and MreB filaments in *B. subtilis*. *Science*  
872 333, 222-225. doi:10.1126/science.1203285
- 873 Gitai, Z., Dye, N., & Shapiro, L. (2004). An actin-like gene can determine cell polarity in bacteria. *Proc*  
874 *Natl Acad Sci U S A* 101, 8643-8648. doi:10.1073/pnas.0402638101
- 875 Gitai, Z., Dye, N. A., Reisenauer, A., Wachi, M., & Shapiro, L. (2005). MreB actin-mediated segregation of  
876 a specific region of a bacterial chromosome. *Cell* 120, 329-341. doi:10.1016/j.cell.2005.01.007
- 877 Glauner, B. (1988). Separation and quantification of muropeptides with high-performance liquid  
878 chromatography. *Anal Biochem* 172, 451-464.
- 879 Glauner, B., Höltje, J. V., & Schwarz, U. (1988). The composition of the murein of *Escherichia coli*. *J Biol*  
880 *Chem* 263, 10088-10095.
- 881 Goley, E. D., Comolli, L. R., Fero, K. E., Downing, K. H., & Shapiro, L. (2010). DipM links peptidoglycan  
882 remodelling to outer membrane organization in *Caulobacter*. *Mol Microbiol* 77, 56-73.  
883 doi:10.1111/j.1365-2958.2010.07222.x
- 884 Höltje, J. V. (1995). From growth to autolysis: the murein hydrolases in *Escherichia coli*. *Arch Microbiol*  
885 164, 243-254.
- 886 Höltje, J. V. (1998). Growth of the stress-bearing and shape-maintaining murein sacculus of *Escherichia*  
887 *coli*. *Microbiol Mol Biol Rev* 62, 181-203.

- 888 Hughes, H. V., Lisher, J. P., Hardy, G. G., Kysela, D. T., Arnold, R. J., Giedroc, D. P., & Brun, Y. V. (2013).  
889 Co-ordinate synthesis and protein localization in a bacterial organelle by the action of a penicillin-  
890 binding-protein. *Mol Microbiol* 90, 1162-1177. doi:10.1111/mmi.12422
- 891 Hussain, S., Wivagg, C. N., Szwedziak, P., Wong, F., Schaefer, K., Izore, T., . . . Garner, E. C. (2018). MreB  
892 filaments align along greatest principal membrane curvature to orient cell wall synthesis. *Elife* 7,  
893 e32471. doi:10.7554/eLife.32471
- 894 Ireland, M. M., Karty, J. A., Quardokus, E. M., Reilly, J. P., & Brun, Y. V. (2002). Proteomic analysis of the  
895 *Caulobacter crescentus* stalk indicates competence for nutrient uptake. *Mol Microbiol* 45, 1029-1041.
- 896 Jackson, K. M., Schwartz, C., Wachter, J., Rosa, P. A., & Stewart, P. E. (2018). A widely conserved  
897 bacterial cytoskeletal component influences unique helical shape and motility of the spirochete  
898 *Leptospira biflexa*. *Mol Microbiol* 108, 77-89. doi:10.1111/mmi.13917
- 899 Jiang, C., Brown, P. J., Ducret, A., & Brun, Y. V. (2014). Sequential evolution of bacterial morphology by  
900 co-option of a developmental regulator. *Nature* 506, 489-493. doi:10.1038/nature12900
- 901 Jones, L. J., Carballido-Lopez, R., & Errington, J. (2001). Control of cell shape in bacteria: helical, actin-like  
902 filaments in *Bacillus subtilis*. *Cell* 104, 913-922.
- 903 Klein, E. A., Schlimpert, S., Hughes, V., Brun, Y. V., Thanbichler, M., & Gitai, Z. (2013). Physiological role  
904 of stalk lengthening in *Caulobacter crescentus*. *Commun Integr Biol* 6, e24561. doi:10.4161/cib.24561
- 905 Krogh, A., Larsson, B., von Heijne, G., & Sonnhammer, E. L. (2001). Predicting transmembrane protein  
906 topology with a hidden Markov model: application to complete genomes. *J Mol Biol* 305, 567-580.  
907 doi:10.1006/jmbi.2000.4315
- 908 Kruse, T., Bork-Jensen, J., & Gerdes, K. (2005). The morphogenetic MreBCD proteins of *Escherichia coli*  
909 form an essential membrane-bound complex. *Mol Microbiol* 55, 78-89. doi:10.1111/j.1365-  
910 2958.2004.04367.x
- 911 Kühn, J., Briegel, A., Mörschel, E., Kahnt, J., Leser, K., Wick, S., . . . Thanbichler, M. (2010). Bactofilins, a  
912 ubiquitous class of cytoskeletal proteins mediating polar localization of a cell wall synthase in  
913 *Caulobacter crescentus*. *EMBO J* 29, 327-339. doi:10.1038/emboj.2009.358
- 914 Kuru, E., Hughes, H. V., Brown, P. J., Hall, E., Tekkam, S., Cava, F., . . . VanNieuwenhze, M. S. (2012). *In*  
915 *situ* probing of newly synthesized peptidoglycan in live bacteria with fluorescent D-amino acids.  
916 *Angew Chem Int Ed Engl* 51, 12519-12523. doi:10.1002/anie.201206749
- 917 Kuru, E., Tekkam, S., Hall, E., Brun, Y. V., & Van Nieuwenhze, M. S. (2015). Synthesis of fluorescent D-  
918 amino acids and their use for probing peptidoglycan synthesis and bacterial growth *in situ*. *Nat*  
919 *Protoc* 10, 33-52. doi:10.1038/nprot.2014.197
- 920 Lee, T. K., Tropini, C., Hsin, J., Desmarais, S. M., Ursell, T. S., Gong, E., . . . Huang, K. C. (2014). A  
921 dynamically assembled cell wall synthesis machinery buffers cell growth. *Proc Natl Acad Sci U S A*  
922 111, 4554-4559. doi:10.1073/pnas.1313826111
- 923 Letunic, I., Doerks, T., & Bork, P. (2015). SMART: recent updates, new developments and status in 2015.  
924 *Nucleic Acids Res* 43, D257-260. doi:10.1093/nar/gku949
- 925 Magnet, S., Dubost, L., Marie, A., Arthur, M., & Gutmann, L. (2008). Identification of the L,D-  
926 transpeptidases for peptidoglycan cross-linking in *Escherichia coli*. *J Bacteriol* 190, 4782-4785.  
927 doi:10.1128/JB.00025-08
- 928 Meeske, A. J., Riley, E. P., Robins, W. P., Uehara, T., Mekalanos, J. J., Kahne, D., . . . Rudner, D. Z. (2016).  
929 SEDS proteins are a widespread family of bacterial cell wall polymerases. *Nature* 537, 634-638.  
930 doi:10.1038/nature19331

- 931 Mohammadi, T., van Dam, V., Sijbrandi, R., Vernet, T., Zapun, A., Bouhss, A., . . . Breukink, E. (2011).  
932 Identification of FtsW as a transporter of lipid-linked cell wall precursors across the membrane.  
933 *EMBO J* 30, 1425-1432. doi:10.1038/emboj.2011.61
- 934 Mohl, D. A., & Gober, J. W. (1997). Cell cycle-dependent polar localization of chromosome partitioning  
935 proteins in *Caulobacter crescentus*. *Cell* 88, 675-684.
- 936 Möll, A., Schlimpert, S., Briegel, A., Jensen, G. J., & Thanbichler, M. (2010). DipM, a new factor required  
937 for peptidoglycan remodelling during cell division in *Caulobacter crescentus*. *Mol Microbiol* 77, 90-  
938 107. doi:10.1111/j.1365-2958.2010.07224.x
- 939 Morgenstein, R. M., Bratton, B. P., Nguyen, J. P., Ouzounov, N., Shaevitz, J. W., & Gitai, Z. (2015). RodZ  
940 links MreB to cell wall synthesis to mediate MreB rotation and robust morphogenesis. *Proc Natl Acad*  
941 *Sci U S A* 112, 12510-12515. doi:10.1073/pnas.1509610112
- 942 Olshausen, P. V., Defeu Soufo, H. J., Wicker, K., Heintzmann, R., Graumann, P. L., & Rohrbach, A. (2013).  
943 Superresolution imaging of dynamic MreB filaments in *B. subtilis* – a multiple-motor-driven  
944 transport? *Biophys J* 105(5), 1171-1181. doi:10.1016/j.bpj.2013.07.038
- 945 Persat, A., Stone, H. A., & Gitai, Z. (2014). The curved shape of *Caulobacter crescentus* enhances surface  
946 colonization in flow. *Nat Commun* 5, 3824. doi:10.1038/ncomms4824
- 947 Poggio, S., Takacs, C. N., Vollmer, W., & Jacobs-Wagner, C. (2010). A protein critical for cell constriction  
948 in the Gram-negative bacterium *Caulobacter crescentus* localizes at the division site through its  
949 peptidoglycan-binding LysM domains. *Mol Microbiol* 77, 74-89. doi:10.1111/j.1365-  
950 2958.2010.07223.x
- 951 Poindexter, J. S. (1964). Biological properties and classification of the *Caulobacter* group. *Bacteriol Rev*  
952 28, 231-295.
- 953 Quardokus, E., Din, N., & Brun, Y. V. (1996). Cell cycle regulation and cell type-specific localization of the  
954 FtsZ division initiation protein in *Caulobacter*. *Proc Natl Acad Sci U S A* 93, 6314-6319.
- 955 Quardokus, E. M., Din, N., & Brun, Y. V. (2001). Cell cycle and positional constraints on FtsZ localization  
956 and the initiation of cell division in *Caulobacter crescentus*. *Mol Microbiol* 39, 949-959.
- 957 Quon, K. C., Yang, B., Domian, I. J., Shapiro, L., & Marczyński, G. T. (1998). Negative control of bacterial  
958 DNA replication by a cell cycle regulatory protein that binds at the chromosome origin. *Proc Natl*  
959 *Acad Sci U S A* 95, 120-125.
- 960 Radhakrishnan, S. K., Thanbichler, M., & Viollier, P. H. (2008). The dynamic interplay between a cell fate  
961 determinant and a lysozyme homolog drives the asymmetric division cycle of *Caulobacter crescentus*.  
962 *Genes Dev* 22, 212-225. doi:10.1101/gad.1601808
- 963 Rice, K. C., & Bayles, K. W. (2008). Molecular control of bacterial death and lysis. *Microbiol Mol Biol Rev*  
964 72, 85-109, doi:10.1128/MMBR.00030-07
- 965 Salje, J., van den Ent, F., de Boer, P., & Löwe, J. (2011). Direct membrane binding by bacterial actin  
966 MreB. *Mol Cell* 43, 478-487. doi:10.1016/j.molcel.2011.07.008
- 967 Scheurwater, E., Reid, C. W., & Clarke, A. J. (2008). Lytic transglycosylases: bacterial space-making  
968 autolysins. *Int J Biochem Cell Biol* 40, 586-591. doi:10.1016/j.biocel.2007.03.018
- 969 Schleifer, K. H., & Kandler, O. (1972). Peptidoglycan types of bacterial cell walls and their taxonomic  
970 implications. *Bacteriol Rev* 36, 407-477.
- 971 Schlimpert, S., Klein, E. A., Briegel, A., Hughes, V., Kahnt, J., Bolte, K., . . . Thanbichler, M. (2012). General  
972 protein diffusion barriers create compartments within bacterial cells. *Cell* 151, 1270-1282.  
973 doi:10.1016/j.cell.2012.10.046
- 974 Schmidt, J. M., & Stanier, R. Y. (1966). The development of cellular stalks in bacteria. *J Cell Biol* 28, 423-  
975 436.

- 976 Seitz, L. C., & Brun, Y. V. (1998). Genetic analysis of mecillinam-resistant mutants of *Caulobacter*  
977 *crenscentus* deficient in stalk biosynthesis. *J Bacteriol* 180, 5235-5239.
- 978 Sham, L. T., Butler, E. K., Lebar, M. D., Kahne, D., Bernhardt, T. G., & Ruiz, N. (2014). MurJ is the flippase  
979 of lipid-linked precursors for peptidoglycan biogenesis. *Science* 345, 220-222.  
980 doi:10.1126/science.1254522
- 981 Shi, C., Fricke, P., Lin, L., Chevelkov, V., Wegstroth, M., Giller, K., . . . Lange, A. (2015). Atomic-resolution  
982 structure of cytoskeletal bactofilin by solid-state NMR. *Sci Adv* 1, e1501087.  
983 doi:10.1126/sciadv.1501087
- 984 Shiomi, D., Sakai, M., & Niki, H. (2008). Determination of bacterial rod shape by a novel cytoskeletal  
985 membrane protein. *EMBO J* 27, 3081-3091. doi:10.1038/emboj.2008.234
- 986 Sommer, J. M., & Newton, A. (1989). Turning off flagellum rotation requires the pleiotropic gene *pleD*:  
987 *pleA*, *pleC*, and *pleD* define two morphogenic pathways in *Caulobacter crescentus*. *J Bacteriol* 171,  
988 392-401.
- 989 Strobel, W., Möll, A., Kiekebusch, D., Klein, K. E., & Thanbichler, M. (2014). Function and localization  
990 dynamics of bifunctional penicillin-binding proteins in *Caulobacter crescentus*. *J Bacteriol* 196, 1627-  
991 1639. doi:10.1128/JB.01194-13
- 992 Suginaka, H., Blumberg, P. M., & Strominger, J. L. (1972). Multiple penicillin-binding components in  
993 *Bacillus subtilis*, *Bacillus cereus*, *Staphylococcus aureus*, and *Escherichia coli*. *J Biol Chem* 247, 5279-  
994 5288.
- 995 Sycuro, L. K., Pincus, Z., Gutierrez, K. D., Biboy, J., Stern, C. A., Vollmer, W., & Salama, N. R. (2010).  
996 Peptidoglycan crosslinking relaxation promotes *Helicobacter pylori*'s helical shape and stomach  
997 colonization. *Cell* 141, 822-833. doi:10.1016/j.cell.2010.03.046
- 998 Takacs, C. N., Hocking, J., Cabeen, M. T., Bui, N. K., Poggio, S., Vollmer, W., & Jacobs-Wagner, C. (2013).  
999 Growth medium-dependent glycine incorporation into the peptidoglycan of *Caulobacter crescentus*.  
1000 *PLoS One* 8, e57579. doi:10.1371/journal.pone.0057579
- 1001 Takacs, C. N., Poggio, S., Charbon, G., Pucheault, M., Vollmer, W., & Jacobs-Wagner, C. (2010). MreB  
1002 drives de novo rod morphogenesis in *Caulobacter crescentus* via remodeling of the cell wall. *J*  
1003 *Bacteriol* 192, 1671-1684. doi:10.1128/JB.01311-09
- 1004 Team, R. D. C. (2012). *R: a language and environment for statistical computing*. Vienna, Austria: The R  
1005 Foundation for Statistical Computing.
- 1006 Thanbichler, M., Iniesta, A. A., & Shapiro, L. (2007). A comprehensive set of plasmids for vanillate- and  
1007 xylose-inducible gene expression in *Caulobacter crescentus*. *Nucleic Acids Res* 35, e137.  
1008 doi:10.1093/nar/gkm818
- 1009 The UniProt Consortium (2017). UniProt: the universal protein knowledgebase. *Nucleic Acids Res* 45,  
1010 D158-D169. doi:10.1093/nar/gkw1099
- 1011 Thanbichler, M., & Shapiro, L. (2006). MipZ, a spatial regulator coordinating chromosome segregation  
1012 with cell division in *Caulobacter*. *Cell* 126, 147-162. doi:10.1016/j.cell.2006.05.038
- 1013 Tsai, J. W., & Alley, M. R. (2001). Proteolysis of the *Caulobacter* McpA chemoreceptor is cell cycle  
1014 regulated by a ClpX-dependent pathway. *J Bacteriol* 183, 5001-5007.
- 1015 Typas, A., Banzhaf, M., Gross, C. A., & Vollmer, W. (2012). From the regulation of peptidoglycan  
1016 synthesis to bacterial growth and morphology. *Nat Rev Microbiol* 10, 123-136.  
1017 doi:10.1038/nrmicro2677
- 1018 Ursell, T. S., Nguyen, J., Monds, R. D., Colavin, A., Billings, G., Ouzounov, N., . . . Huang, K. C. (2014). Rod-  
1019 like bacterial shape is maintained by feedback between cell curvature and cytoskeletal localization.  
1020 *Proc Natl Acad Sci U S A* 111, E1025-1034. doi:10.1073/pnas.1317174111

- 1021 van den Ent, F., Amos, L. A., & Löwe, J. (2001). Prokaryotic origin of the actin cytoskeleton. *Nature* 413,  
1022 39-44. doi:10.1038/35092500
- 1023 van den Ent, F., Izore, T., Bharat, T. A., Johnson, C. M., & Löwe, J. (2014). Bacterial actin MreB forms  
1024 antiparallel double filaments. *Elife* 3, e02634. doi:10.7554/eLife.02634
- 1025 van Heijenoort, J. (2007). Lipid intermediates in the biosynthesis of bacterial peptidoglycan. *Microbiol*  
1026 *Mol Biol Rev* 71, 620-635. doi:10.1128/MMBR.00016-07
- 1027 van Heijenoort, J. (2011). Peptidoglycan hydrolases of *Escherichia coli*. *Microbiol Mol Biol Rev* 75, 636-  
1028 663. doi:10.1128/MMBR.00022-11
- 1029 van Teeffelen, S., Wang, S., Furchtgott, L., Huang, K. C., Wingreen, N. S., Shaevitz, J. W., & Gitai, Z.  
1030 (2011). The bacterial actin MreB rotates, and rotation depends on cell-wall assembly. *Proc Natl Acad*  
1031 *Sci U S A* 108, 15822-15827. doi:10.1073/pnas.1108999108
- 1032 Vollmer, W., & Bertsche, U. (2008). Murein (peptidoglycan) structure, architecture and biosynthesis in  
1033 *Escherichia coli*. *Biochim Biophys Acta* 1778, 1714-1734. doi:10.1016/j.bbamem.2007.06.007
- 1034 Vollmer, W., Blanot, D., & de Pedro, M. A. (2008). Peptidoglycan structure and architecture. *FEMS*  
1035 *Microbiol Rev* 32, 149-167. doi:10.1111/j.1574-6976.2007.00094.x
- 1036 Vollmer, W., Joris, B., Charlier, P., & Foster, S. (2008). Bacterial peptidoglycan (murein) hydrolases. *FEMS*  
1037 *Microbiol Rev* 32, 259-286. doi:10.1111/j.1574-6976.2007.00099.x
- 1038 Wagner, J. K., Galvani, C. D., & Brun, Y. V. (2005). *Caulobacter crescentus* requires RodA and MreB for  
1039 stalk synthesis and prevention of ectopic pole formation. *J Bacteriol* 187, 544-553.  
1040 doi:10.1128/JB.187.2.544-553.2005
- 1041 Weiss, D. S., Chen, J. C., Ghigo, J. M., Boyd, D., & Beckwith, J. (1999). Localization of FtsI (PBP3) to the  
1042 septal ring requires its membrane anchor, the Z ring, FtsA, FtsQ, and FtsL. *J Bacteriol* 181, 508-520.
- 1043 Wickham, H. (2007). Reshaping data with the reshape Package. *J Stat Softw* 21, 1-20.
- 1044 Wickham, H. (2009). *ggplot2: Elegant graphics for data analysis*: Springer, New York.
- 1045 Yakhnina, A. A., & Gitai, Z. (2013). Diverse functions for six glycosyltransferases in *Caulobacter*  
1046 *crescentus* cell wall assembly. *J Bacteriol* 195, 4527-4535. doi:10.1128/JB.00600-13
- 1047 Zielinska, A., Billini, M., Möll, A., Kremer, K., Briegel, A., Izquierdo Martinez, A., . . . Thanbichler, M.  
1048 (2017). LytM factors affect the recruitment of autolysins to the cell division site in *Caulobacter*  
1049 *crescentus*. *Mol Microbiol* 106, 419-438. doi:10.1111/mmi.13775

## Figures

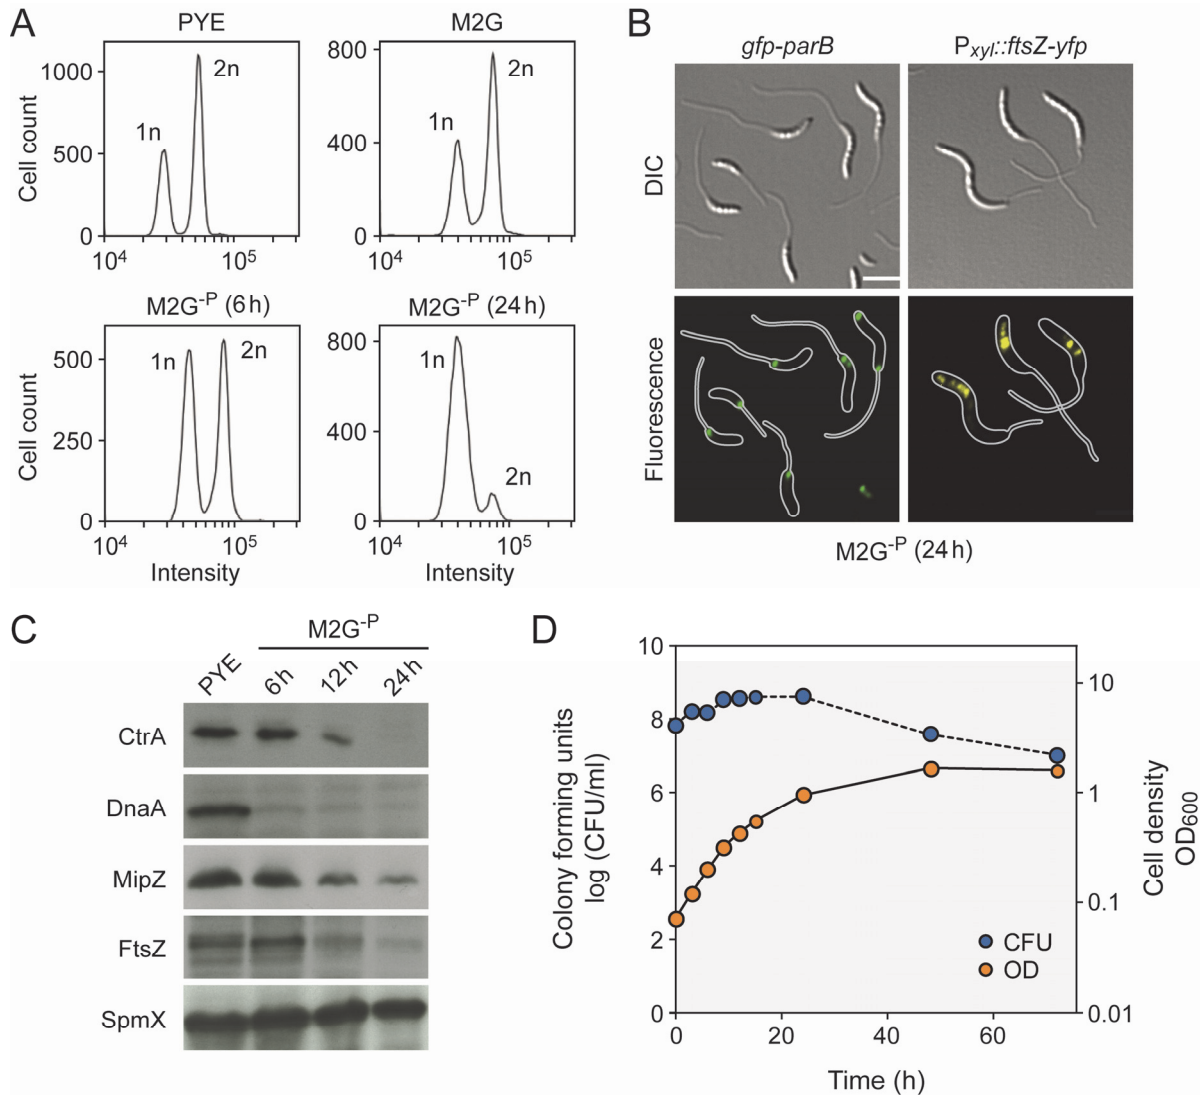

1050 **Figure 1. Progressive arrest of DNA replication and cell division under phosphate starvation.** (A) DNA content of *C. crescentus*  
 1051 wild-type cells grown in PYE (rich medium, exponential phase), M2G (minimal medium, exponential phase), and M2G<sup>-P</sup>  
 1052 (phosphate-lacking medium) for 12 h and 24 h. Cells were treated with 20 μg ml<sup>-1</sup> rifampicin to prevent the reinitiation of  
 1053 replication prior to analysis by flow cytometry. (B) Subcellular localization of GFP-ParB and FtsZ-YFP in cells of strains MT199  
 1054 (*P<sub>van</sub>::P<sub>van</sub>-ftsZ-yfp*) and MT174 (*parB::gfp-parB*) after 24 h of cultivation in M2G<sup>-P</sup> medium. Synthesis of FtsZ-YFP was induced  
 1055 by addition of 50 μM vanillate 3 h prior to analysis (scale bar: 3 μm). (C) Changes in the levels of CtrA, DnaA, FtsZ, and MipZ over  
 1056 the course of phosphate starvation. Wild-type cells were grown in PYE, transferred into M2G<sup>-P</sup> medium and subjected to Western  
 1057 blot analysis after 6 h, 12 h, and 24 h of incubation. A Western blot detecting SpmX served as a loading control. (D) Changes in  
 1058 the optical density (OD<sub>600</sub>) and viable-cell counts (CFU/ml) after transfer of a wild-type culture to M2G<sup>-P</sup> medium.

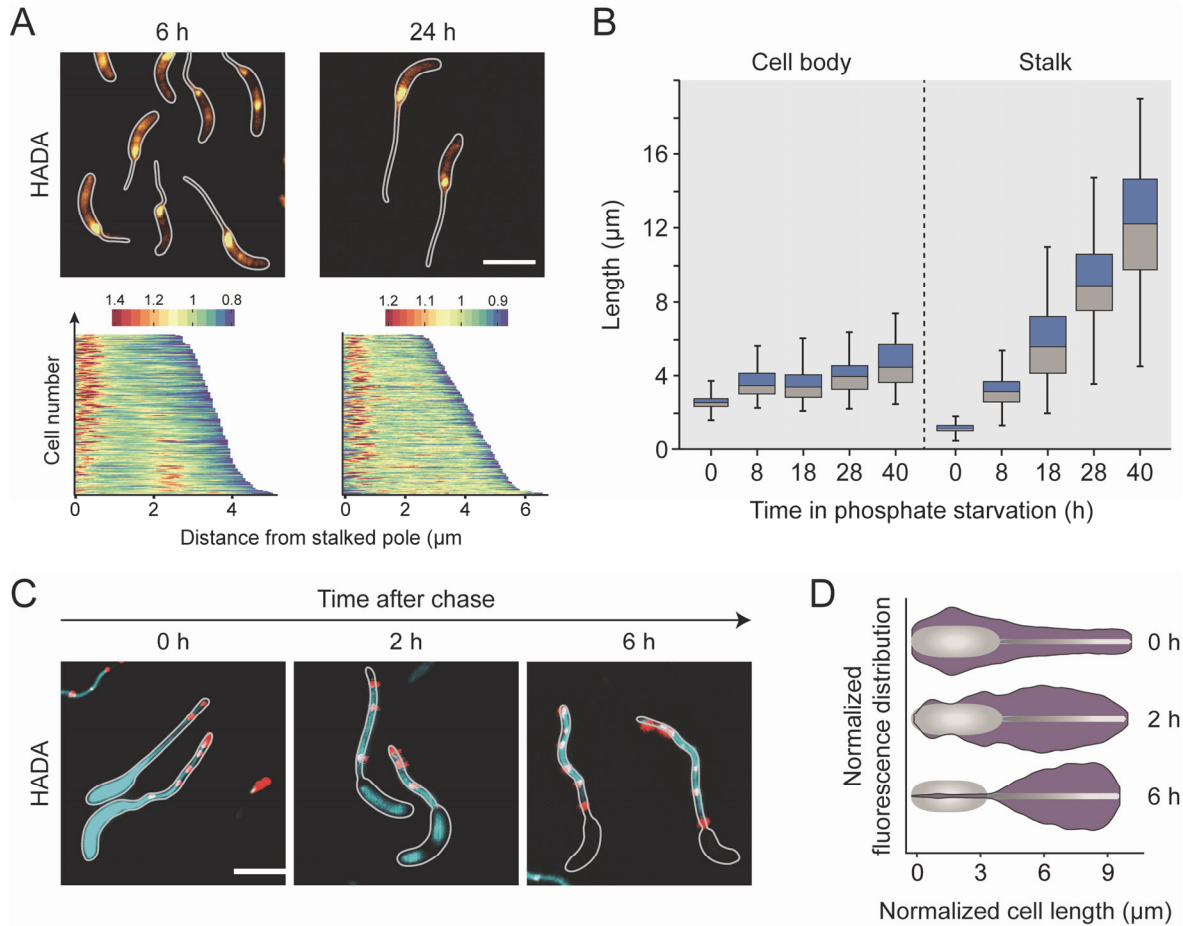

1059 **Figure 2. Reorganization of cell wall biosynthesis in the absence of phosphate.** (A) Major growth zones of phosphate-starved  
 1060 wild-type cells. Cells were cultivated in M2G<sup>-P</sup> medium for 6 h or 24 h and exposed to a short (2 min) pulse of HADA. The  
 1061 subcellular distribution of the fluorescence signals was quantified by demographic analysis of a random subpopulation of cells  
 1062 (n=200). To generate the graphs, single-cell fluorescence profiles were sorted according to cell length and stacked on top of each  
 1063 other (scale bars: 3  $\mu\text{m}$ ). (B) Changes in stalk and cell body lengths during phosphate starvation. Wild-type cells were incubated  
 1064 in M2G<sup>-P</sup> medium for 8 h, 18 h, 28 h, and 40 h prior to imaging. The data are shown as box plots, with the horizontal line indicating  
 1065 the median, the box the interquartile range, and the whiskers the 2<sup>th</sup> and 98<sup>th</sup> percentile (0 h: n=210, 8 h: n=209, 28 h: n=208)  
 1066 (\*\*\*)  $p < 10^{-6}$ ; t-test). (C and D) Slow turnover of PG in the stalk compartment. Cells were cultivated in M2G<sup>-P</sup> medium for 18 h and  
 1067 exposed to HADA for an extended period of time (1.5 h). Subsequently, they were washed, transferred into fresh in M2G<sup>-P</sup>  
 1068 medium and grown for 2 h, 4 h, and 6 h in the absence of the label (scale bars: 3  $\mu\text{m}$ ). To quantify the changes in HADA  
 1069 fluorescence overtime, fluorescence profiles were obtained from random subpopulations of cells (n=200 per time point). The  
 1070 lengths of the profiles in each quintile of the cell length distribution were normalized to the maximum cell length in the respective  
 1071 quintile. Subsequently, the fluorescence intensities were averaged and used to generate violin plots. Shown is a representative  
 1072 part of the data depicting the fluorescence distributions in the fourth quintile at each of the time points (D). The full analysis is  
 1073 presented in [Figure S2C](#).

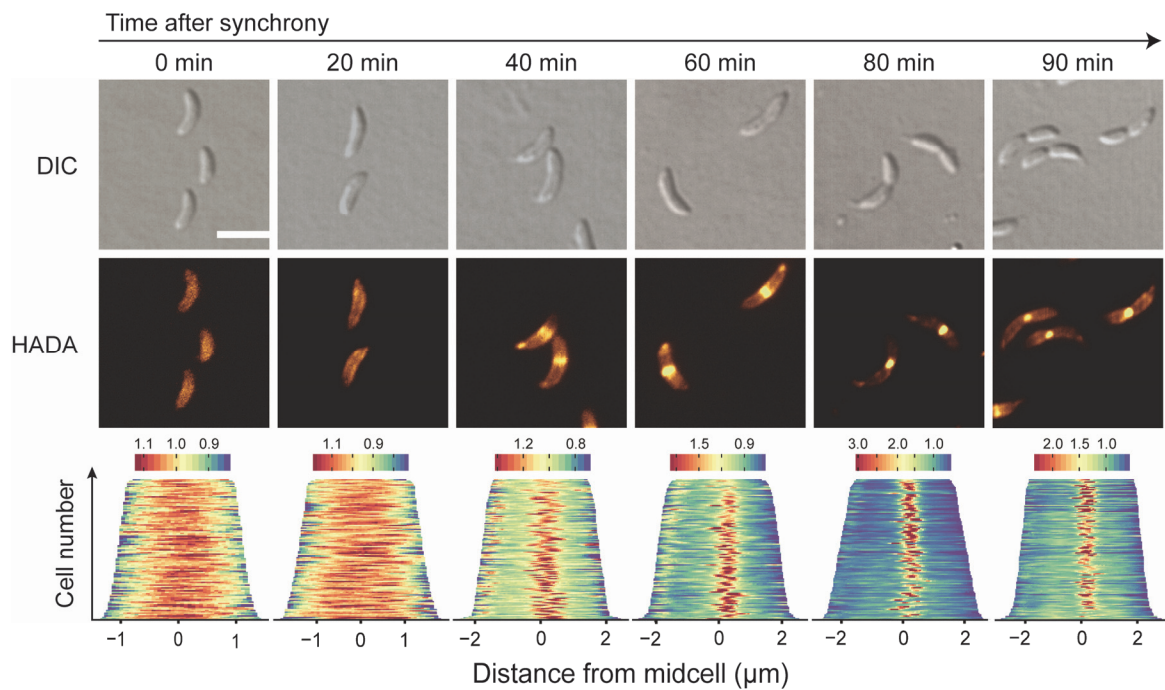

1074 **Figure 2-figure supplement 1. HADA incorporation in wild-type cells in the presence of phosphate.** Wild-type (NA1000)  
1075 swarmer cells were transferred into PYE medium and cultivated for the duration of one cell cycle. At the indicated time points,  
1076 samples were taken, pulse-labeled (2 min) with HADA, and subjected to fluorescence microscopy (scale bar: 3  $\mu\text{m}$ ). The  
1077 demographs show the distribution of HADA fluorescence in random subpopulations of cells (n=200 per time point).



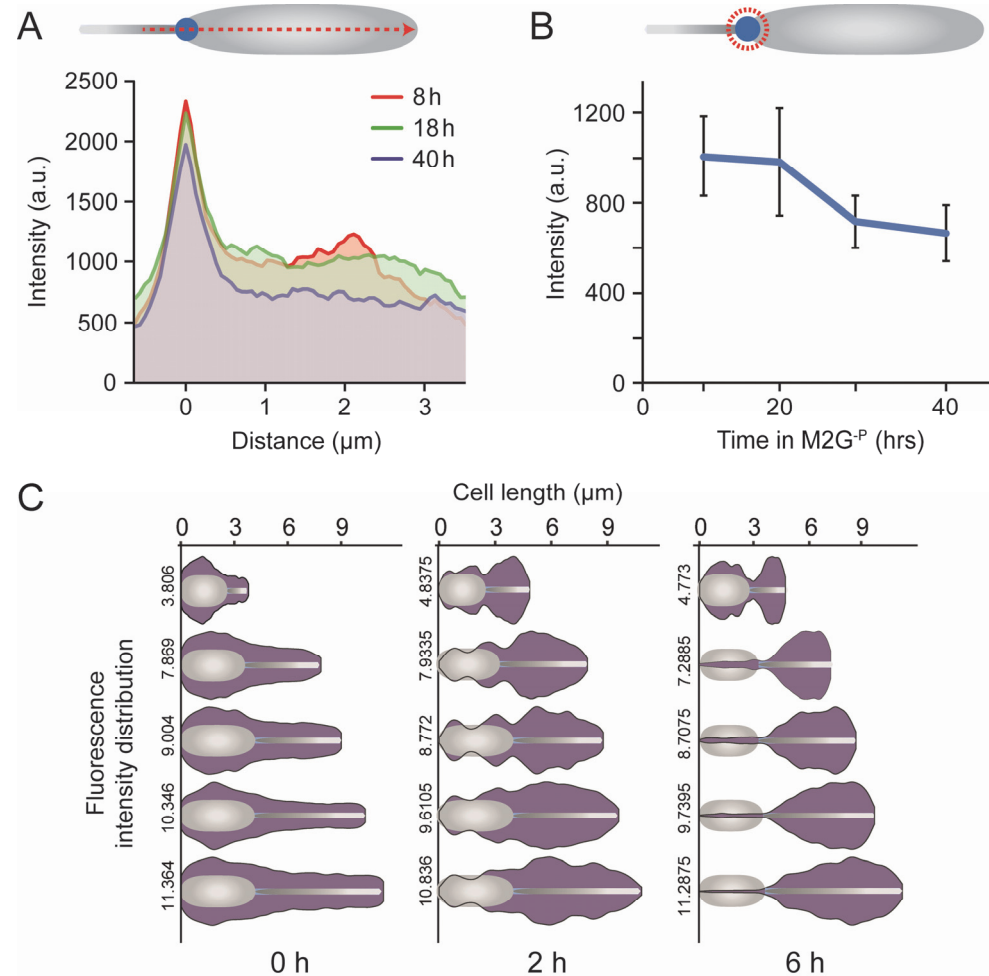

1078 **Figure 2—figure supplement 2. Changes in HADA incorporation during transition to phosphate starvation.** (A) Distribution of  
 1079 newly synthesized PG after different times of phosphate starvation. Cells of wild-type strain NA1000 were cultivated in M2G<sup>P</sup>  
 1080 medium for the indicated amount of time and exposed to a short (2 min) pulse of HADA. After microscopic analysis, the  
 1081 distribution of fluorescence along the long axis of the cells was determined by line scan analysis for multiple cells per time point.  
 1082 The curves obtained were normalized to the average cell length of the population analyzed, aligned at the center of the stalked-  
 1083 pole focus and averaged (n=42 at 8 h, n=40 at 18 h, and n=44 at 40 h). (B) Intensity of HADA fluorescence at the stalked pole in  
 1084 wild-type (NA1000) cells cultivated in M2G<sup>P</sup> medium for 8 h (n=51), 18 h (n=60), 28 h (n=54), and 40 h (n=54). Error bars represent  
 1085 standard deviations. (C) Slow turnover of PG in the stalk. Cells were cultivated in M2G<sup>P</sup> medium for 18 h and exposed to HADA  
 1086 for an extended period of time (1.5 h) to uniformly label their peptidoglycan layer. Subsequently, they were washed, transferred  
 1087 into HADA-free M2G<sup>P</sup> medium, and cultivated for 2 h, 4 h, and 6 h in the absence of the label (scale bars: 3 μm). To quantify the  
 1088 changes in HADA fluorescence overtime, fluorescence profiles were obtained from random subpopulations of cells (n=200 per  
 1089 time point). The lengths of the profiles in each quintile of the cell length distribution were normalized to the maximum cell length  
 1090 in the respective quintile, and the fluorescence intensities were averaged and shown as violin plots.

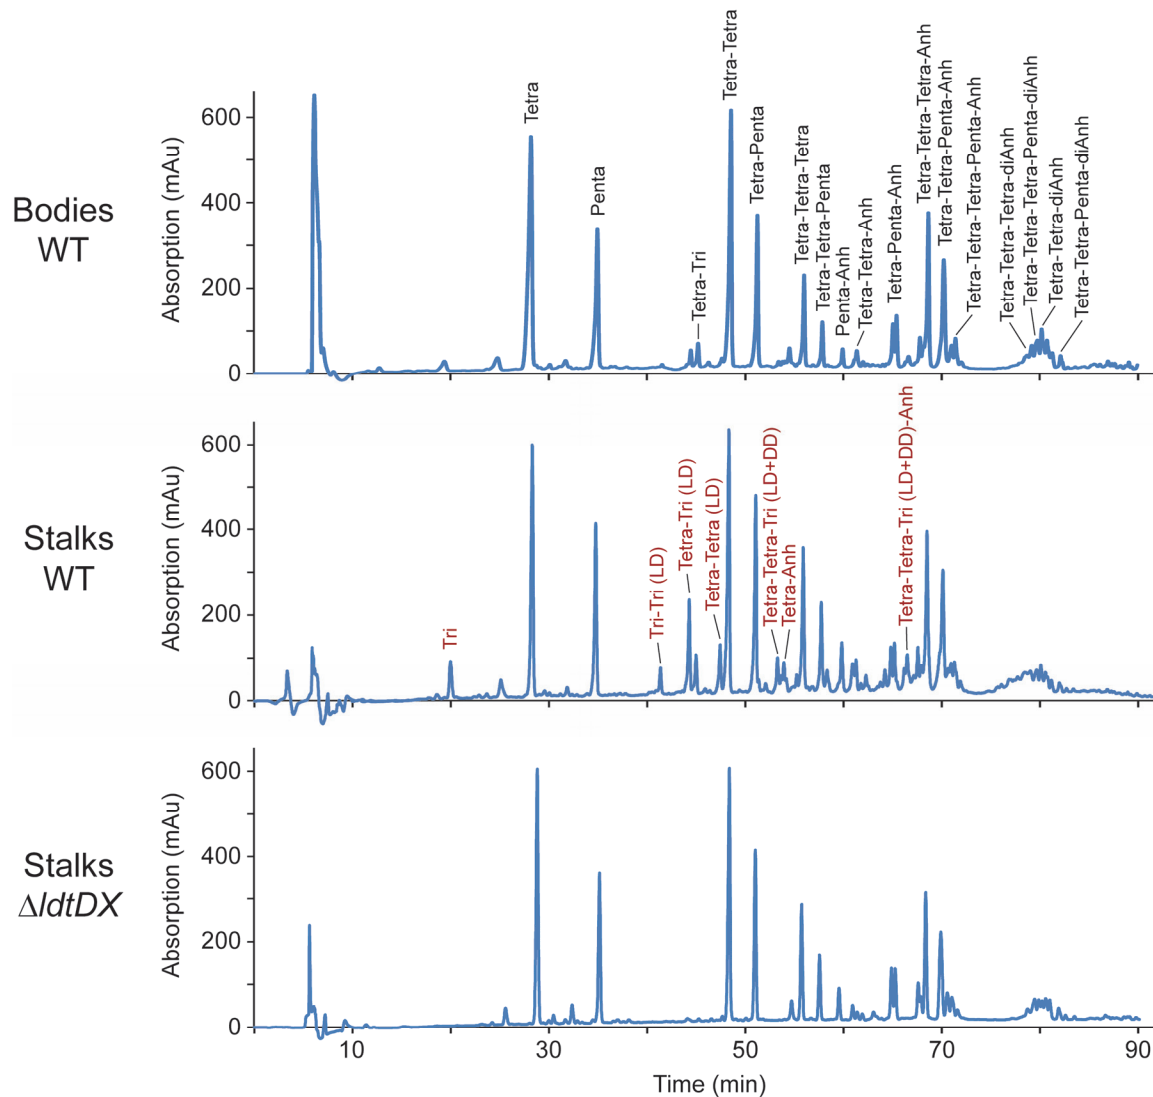

1091 **Figure 3. Differential composition of cell body and stalk peptidoglycan.** Shown are the HPLC profiles of mucopeptides obtained  
 1092 from the cell body and stalk fractions of strains NA1000 (WT) and AZ138 ( $\Delta ldtD \Delta ldtX$ ) after growth in M2G<sup>P</sup> medium for 24 h. In  
 1093 the first panel, the identities of the most abundant mucopeptides are given in black. In the second panel, products that are  
 1094 specifically enriched in the stalk fraction are indicated in red. Abbreviations: Tri: GlcNAc–MurNAc(r)–L-Ala–D-Glu–mDap; Tetra:  
 1095 GlcNAc–MurNAc(r)–L-Ala–D-Glu–mDap–D-Ala; Penta: GlcNAc–MurNAc(r)–L-Ala–D-Glu–mDap–D-Ala–D-Ala; Anh: 1,6-anhydro-  
 1096 MurNAc; DD: mDap–D-Ala cross-link; LD: mDap–mDap crosslink.

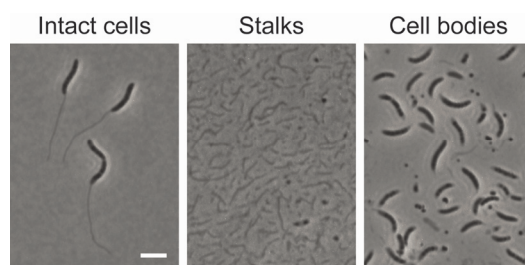

1097 **Figure 3—figure supplement 1. Visualization of isolated stalk and cell body fractions.** Cells were cultivated for 24 h in M2G<sup>P</sup>  
1098 medium, agitated vigorously, and then subjected to differential centrifugation to separate stalks and cell bodies. Samples of the  
1099 intact cells and the stalk and cell body fractions were visualized by phase contrast microscopy (scale bar: 3  $\mu$ m).

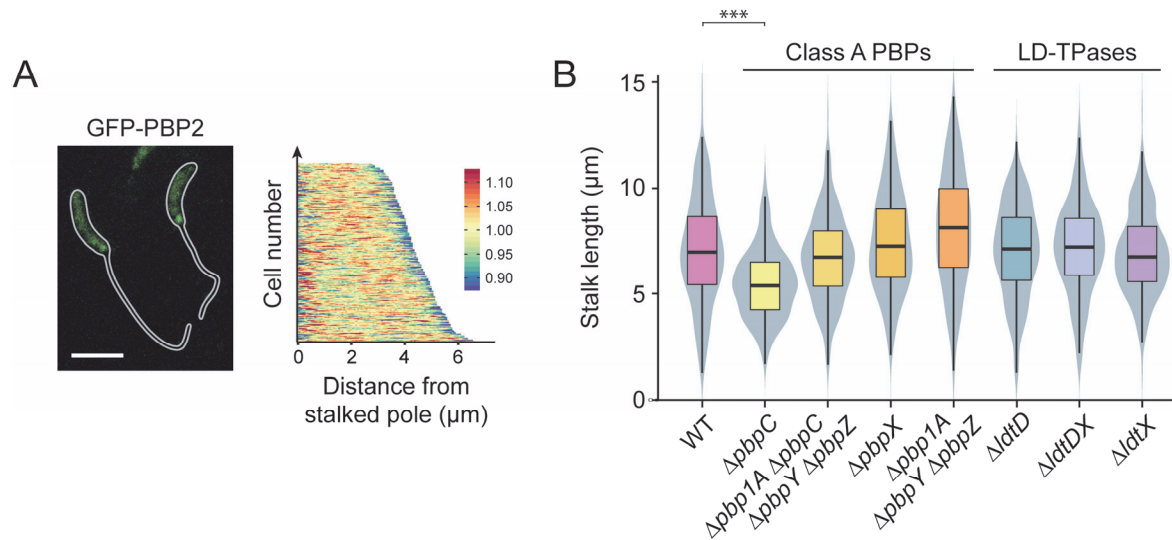

1100 **Figure 4. Participation of PG biosynthetic enzymes in stalk elongation.** (A) Localization of GFP-PBP2 fusion in strain MAB244  
 1101 (*pbp2::gfp-pbp2*) after 24 h of cultivation in M2G<sup>P</sup>. The demograph shows the fluorescence profiles of a random subpopulation  
 1102 of cells sorted according to cell length (n=227). (B) Distribution of the stalk lengths in populations of mutants lacking specific PG  
 1103 synthases. Shown are the results obtained for MT286 ( $\Delta\text{pbpC}$ ), JK305 ( $\Delta\text{pbpA1} \Delta\text{pbpC} \Delta\text{pbpY} \Delta\text{pbpZ}$ ), KK1 ( $\Delta\text{pbpX}$ ), KK12 ( $\Delta\text{pbpA1}$   
 1104  $\Delta\text{pbpY} \Delta\text{pbpZ}$ ), AZ137 ( $\Delta\text{ldtD}$ ), AZ138 ( $\Delta\text{ldtDX}$ ), and AZ140 ( $\Delta\text{ldtX}$ ) after 24 h of growth in M2G<sup>P</sup> medium. Data are represented as  
 1105 box plots, with the horizontal line indicating the median, the box the interquartile range and the whiskers the 2<sup>nd</sup> and the 98<sup>th</sup>  
 1106 percentile (n=210 per strain). In addition rotated kernel density plots (grey) are depicted for each dataset to indicate the  
 1107 distribution of the raw data (\*\*\*)  $p < 10^{-6}$ ; t-test).

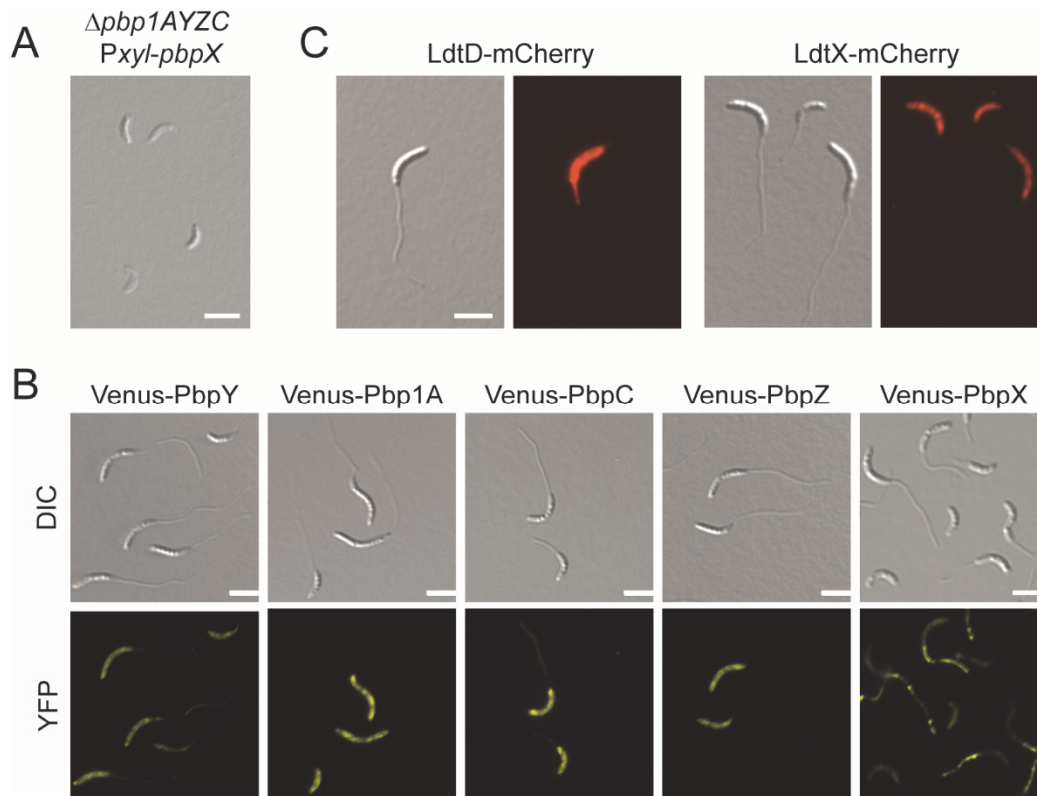

1108 **Figure 4-figure supplement 1. Role of PG synthases in stalk elongation under phosphate starvation.** (A) Lysis of a conditional  
1109 mutant lacking all class A PBPs during cultivation in phosphate-limiting conditions. Cells of strain WS056 ( $\Delta pbpY$   $\Delta pbp1A$   $\Delta pbpC$   
1110  $\Delta pbpZ$  *PxyI::PxyI-pbpX*) were pre-grown until exponential phase in PYE medium containing the inducer xylose, transferred in PYE  
1111 without xylose after two washing steps, and grown for additional 12 h until they reached stationary phase. Then cells were diluted  
1112 (1:20) into xylose-free M2G<sup>-P</sup> medium, and cultivated for 24 h prior to visualization by DIC microscopy (scale bar: 3  $\mu$ m). (B)  
1113 Localization of fluorescently tagged class A PBPs under conditions of phosphate starvation. Cells of strains AM457 (*PxyI::PxyI-*  
1114 *venus-pbpY*), KK33 (*PxyI::PxyI-venus-pbp1a*), MT279 (*PxyI::PxyI-venus-pbpC*), AM458 (*PxyI::PxyI-venus-pbpZ*), and MT278  
1115 (*PxyI::PxyI-venus-pbpX*), were grown for 24 h in M2G<sup>-P</sup> medium and visualized by fluorescence microscopy. Three hours prior to  
1116 analysis, the cultures were supplemented with 0.3% xylose to induce synthesis of the fusion proteins (scale bars: 3  $\mu$ m). (C)  
1117 Localization of fluorescently tagged LD-TPases under conditions of phosphate starvation. Shown are cells of strains MAB389  
1118 (*PxyI::PxyI-ltdD-mCherry*) and MAB390 (*PxyI::PxyI-ltdX-mCherry*) cultivated and induced as described for panel B (scale bar: 3  $\mu$ m).

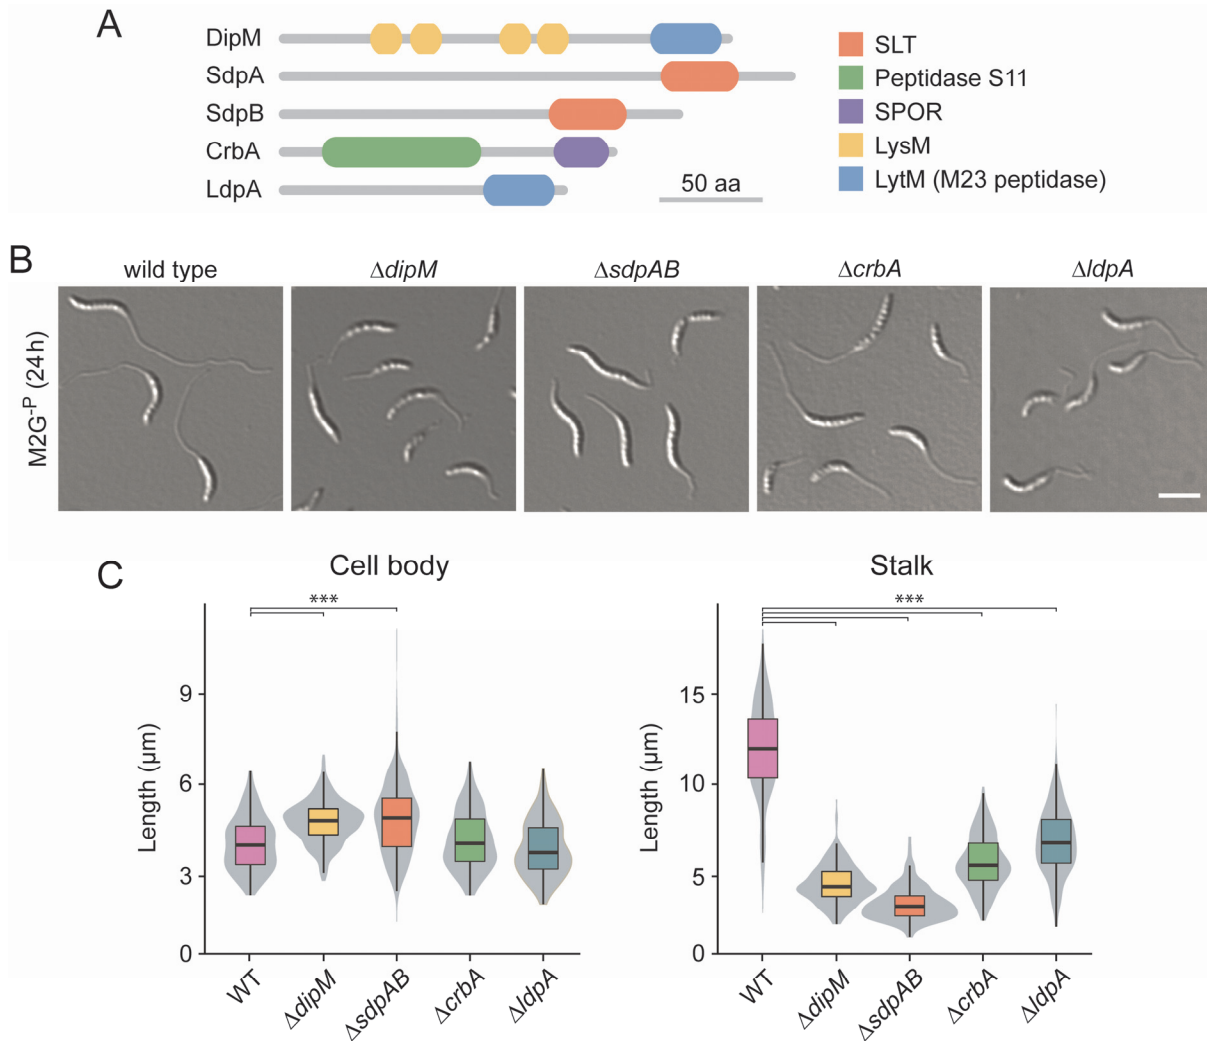

1119 **Figure 5. Participation of autolytic factors in stalk elongation.** (A) Domain structure of selected components of the autolytic  
 1120 machinery of *C. crescentus*. (B) DIC micrographs of mutant cells exhibiting a stalk elongation defect. Shown are strains MT258  
 1121 ( $\Delta dipM$ ), AZ22 ( $\Delta sdpAB$ ), AM376 ( $\Delta crbA$ ), and AM364 ( $\Delta ldpA$ ) in comparison to NA1000 (WT) after 24 h of cultivation in M2G<sup>-P</sup>  
 1122 medium. (C) Distribution of the cell body and stalk lengths in populations of strains MT258, AZ22, AM376, and AM364 after  
 1123 growth in M2G<sup>-P</sup> for 24 h. The values obtained are shown as box plots, with the horizontal line indicating the median, the box the  
 1124 interquartile range and the whiskers the 2<sup>nd</sup> and the 98<sup>th</sup> percentile (n=210 per strain). In addition rotated kernel density plots  
 1125 (grey) are depicted for each dataset to indicate the distribution of the raw data (\*\*\*)  $p < 10^{-6}$ ; t-test).

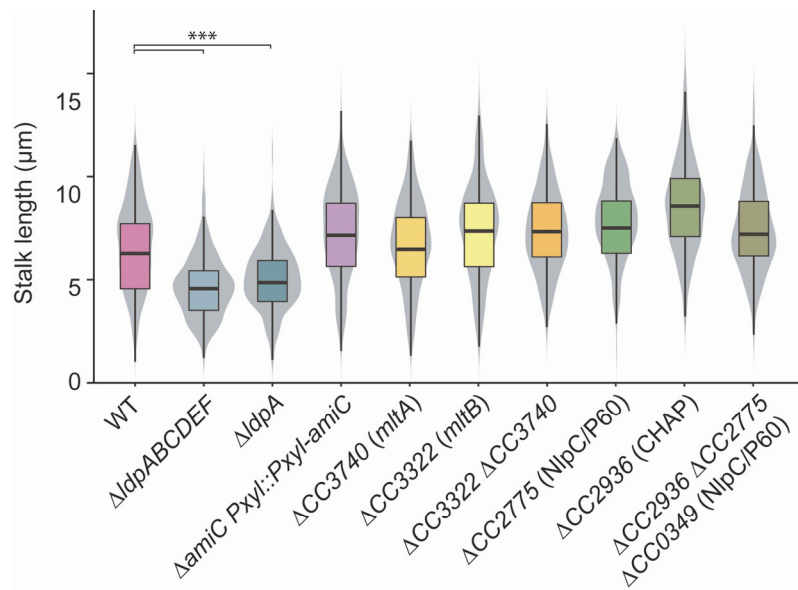

1126 **Figure 5—figure supplement 1. Role of autolytic enzymes in stalk elongation under phosphate starvation. (A)** Distribution of  
1127 stalk lengths in populations of mutants lacking predicted autolytic enzymes. Shown are cells of strains AZ52 ( $\Delta ldpABCDE$ ), AM364  
1128 ( $\Delta ldpA$ ), MAB386 ( $\Delta amiC$  PxyI::PxyI-amiC), MAB239 ( $\Delta CC3740$ ), MAB233 ( $\Delta CC3322$ ), MAB251 ( $\Delta CC3322 \Delta CC3740$ ), AZ85  
1129 ( $\Delta CC2775$ ), MAB248 ( $\Delta CC2936$ ), and MAB250 ( $\Delta CC2936 \Delta CC2775 \Delta CC0349$ ) harvested after 24 h of cultivation in M2G<sup>P</sup> medium.  
1130 The values obtained (n=210 per strain) are shown as box plots, with the thick line indicating the median, the box the interquartile  
1131 range and the whiskers the 2<sup>nd</sup> and the 98<sup>th</sup> percentile. In addition rotated kernel density plots (grey) are depicted for each dataset  
1132 to indicate the distribution of the raw data (\*\*\*) p < 10<sup>-6</sup>; t-test).

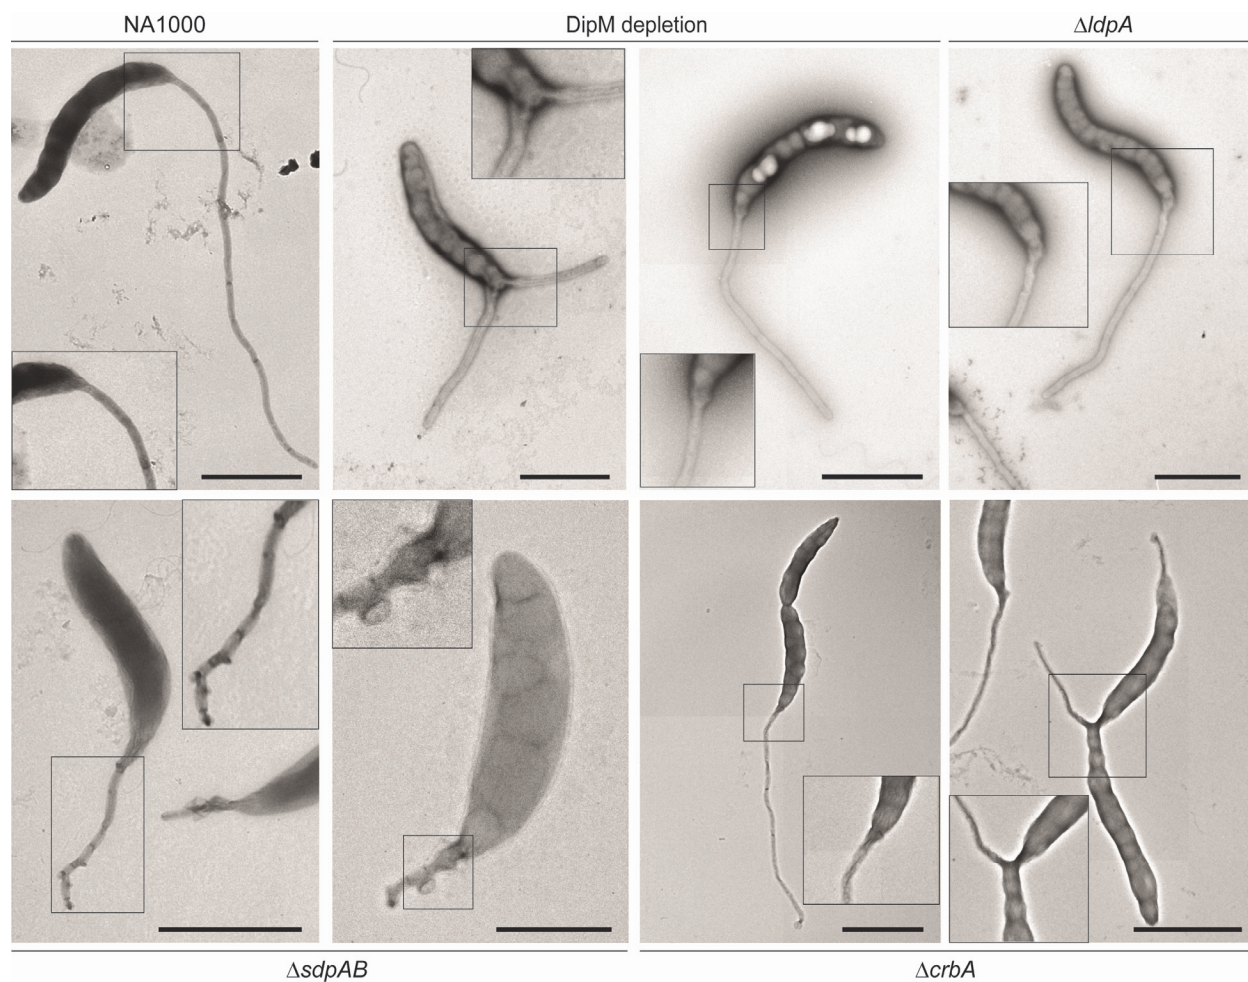

1133 **Figure 5—figure supplement 2. Transmission electron micrographs of mutants lacking autolytic enzymes.** Cells of strains NA1000  
1134 (WT), MAB360 ( $\Delta dipM$  P<sub>xyl</sub>::P<sub>xyl</sub>-*dipM*), AM364 ( $\Delta dpA$ ), A222 ( $\Delta sdpAB$ ), and AM376 ( $\Delta crbA$ ) were grown for 24 h in M2G<sup>-P</sup>  
1135 medium, stained with uranyl acetate, and visualized by transmission electron microscopy (scale bars: 2  $\mu\text{m}$ ).



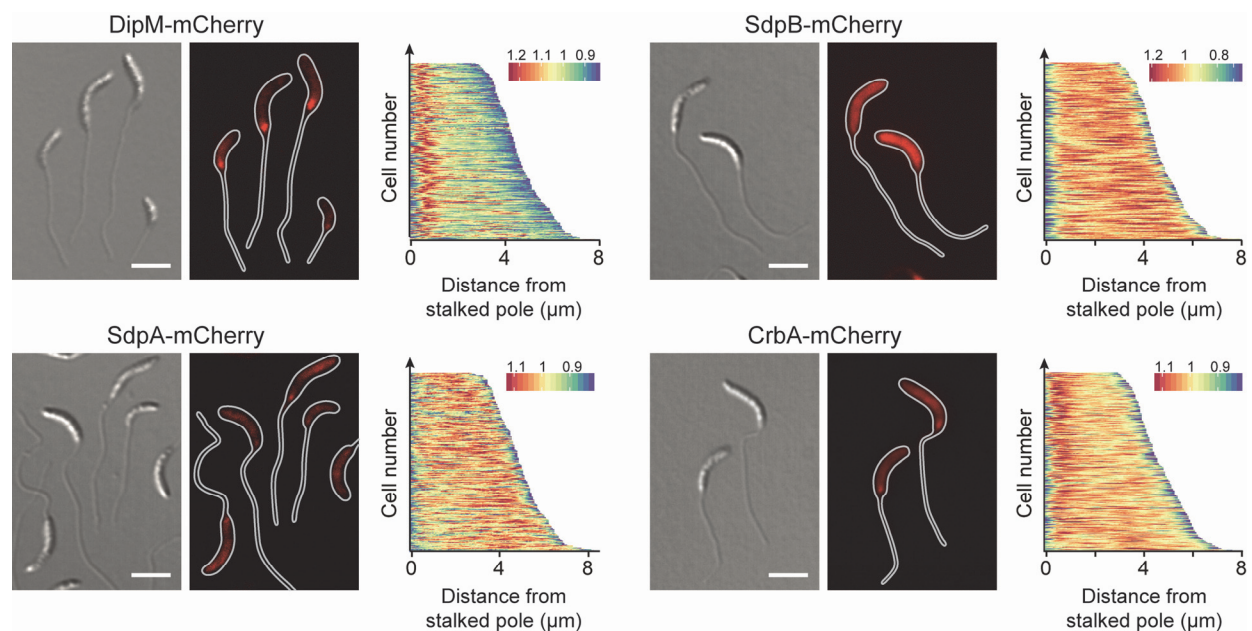

1136 **Figure 6. Localization of autolytic factors in phosphate-starved cells.** Shown are the localization patterns of SdpA-mCherry  
1137 (AM480, P<sub>xyl</sub>::P<sub>xyl</sub>-sdpA-mCherry), CrbA-mCherry (MAB247, P<sub>xyl</sub>::P<sub>xyl</sub>-crbA-mCherry), DipM-mCherry (AM208, P<sub>xyl</sub>::P<sub>xyl</sub>-dipM-  
1138 mCherry), and SdpB-mCherry (AZ127, P<sub>xyl</sub>::P<sub>xyl</sub>-sdpB-mCherry) in cells cultivated for 24 h in M2G<sup>P</sup> medium (scale bars: 3 μm).  
1139 Synthesis of the fluorescent protein fusions was induced for 3 h (for DipM, SdpA, and CrbA) or 2 h (for SdpB) with 0.3% xylose  
1140 prior to analysis. The demographs next to the images show the fluorescence profiles of a random subpopulation of cells sorted  
1141 according to cell length (n=200 for each strain).

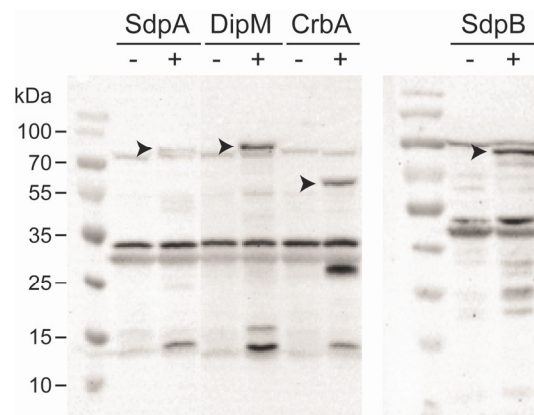

1142 **Figure 6—figure supplement 1. Stability of fluorescent protein fusions.** Western blot analysis of strains producing fluorescently  
1143 tagged derivatives of SdpA (AM480, P<sub>xyl</sub>::P<sub>xyl</sub>-*sdpA*-*mCherry*), DipM (AM208, P<sub>xyl</sub>::P<sub>xyl</sub>-*dipM*-*mCherry*), CrbA (MAB247,  
1144 P<sub>xyl</sub>::P<sub>xyl</sub>-*crbA*-*mCherry*), and SdpB (AZ127, P<sub>xyl</sub>::P<sub>xyl</sub>-*torA'*-*sdpB*-*mCherry*). Cells were grown for 24 h in M2G<sup>P</sup> medium and  
1145 subjected to microscopy. Three hours (AM480, MAB247, and AM208) or two hours (AZ127) prior to analysis, the media were  
1146 supplemented with 0.3% xylose to induce synthesis of the fusion proteins (+). Cells grown in the absence of xylose (-) are shown  
1147 as controls.

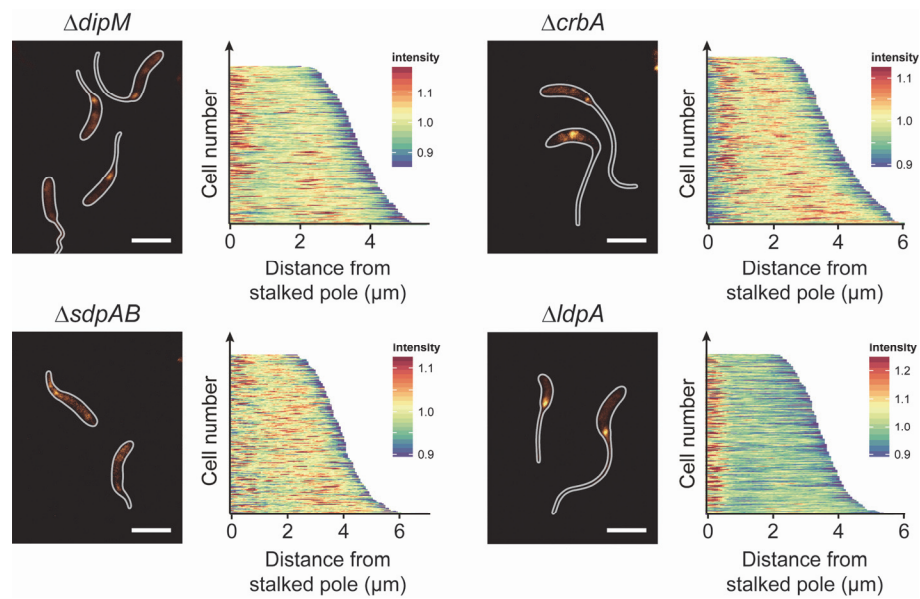

1148 **Figure 7. Cell wall biosynthesis in mutants with defects in the autolytic machinery.** Shown are fluorescence images of strains  
1149 NA1000 (WT), MT258 ( $\Delta dipM$ ), AZ22 ( $\Delta sdpAB$ ), AM376 ( $\Delta crbA$ ), and AM364 ( $\Delta ldpA$ ) after 24 h of incubation in M2G<sup>-P</sup> medium  
1150 and subsequent HADA staining (2 min). The distribution of the fluorescence signals was quantified by demographic analysis of a  
1151 random subpopulation of cells (n=200 for each strain) (scale bars: 3  $\mu m$ ).

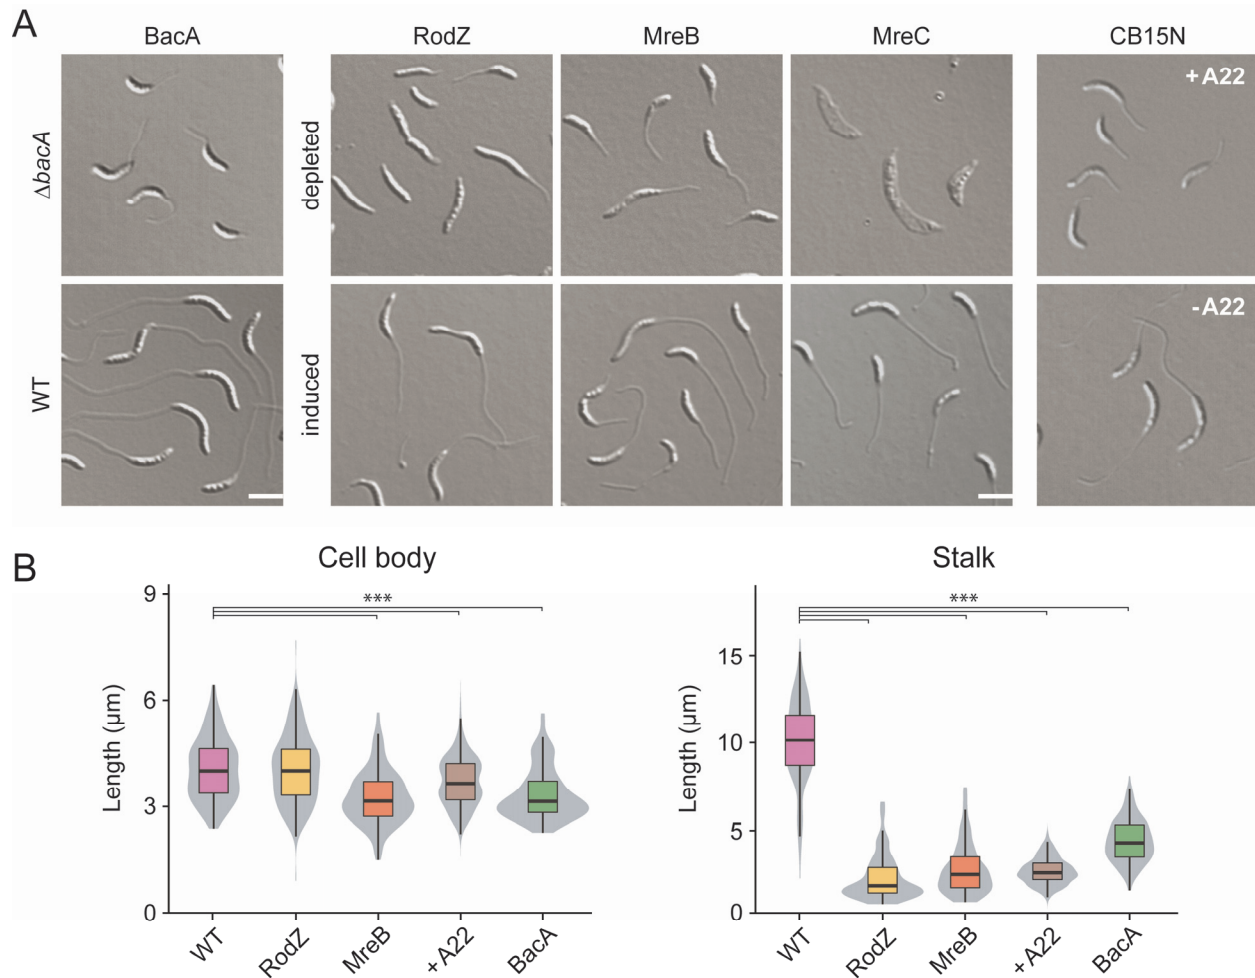

1152 **Figure 8. Role of scaffolding proteins in stalk elongation.** (A) DIC images of cells lacking single scaffolding proteins. The strains  
 1153 analyzed were LS4275 ( $\Delta mreC$  P<sub>xyl</sub>::P<sub>xyl</sub>-*mreC*), LS3809 ( $\Delta mreB$  P<sub>xyl</sub>::P<sub>xyl</sub>-*mreB*), CJW2747 ( $\Delta rodZ::\Omega$  P<sub>xyl</sub>::P<sub>xyl</sub>-*rodZ*), MT257  
 1154 ( $\Delta bacA$ ). Strain NA1000 (WT) is shown as a wild-type control. Strains LS4275, LS3809, and CJW2747 were grown to exponential  
 1155 phase PYE medium containing the inducer xylose. Subsequently, the cells were washed, grown for another 7 h in PYE medium  
 1156 with or without inducer and then incubated for 24 h in M2G<sup>P</sup> medium with or without inducer prior to imaging by DIC microscopy.  
 1157 Strain MT257 was grown to stationary phase in PYE medium, diluted (1:20) into M2G<sup>P</sup> medium, and grown for 24 h prior to  
 1158 analysis. Strain NA1000 (WT) was grown in M2G<sup>P</sup> medium. After 9 h, the cultures were supplemented with A22 at a final  
 1159 concentration of 10  $\mu\text{g}/\text{ml}$  and incubated for additional 15 h prior to imaging (scale bar: 3  $\mu\text{m}$ ). (B) Distribution of cell body and  
 1160 stalk lengths in populations of WT NA1000 and depleted strains LS4275, LS3809, CJW2747, and MT257 grown as described in (A).  
 1161 The data are shown as box plots, with the horizontal line indicating the median, the box the interquartile range and the whiskers  
 1162 the 2<sup>nd</sup> and the 98<sup>th</sup> percentile (n=210 per strain). In addition rotated kernel density plots (grey) are depicted for each dataset to  
 1163 indicate the distribution of the raw data (\*\*\*) p < 10<sup>-6</sup>; t-test).

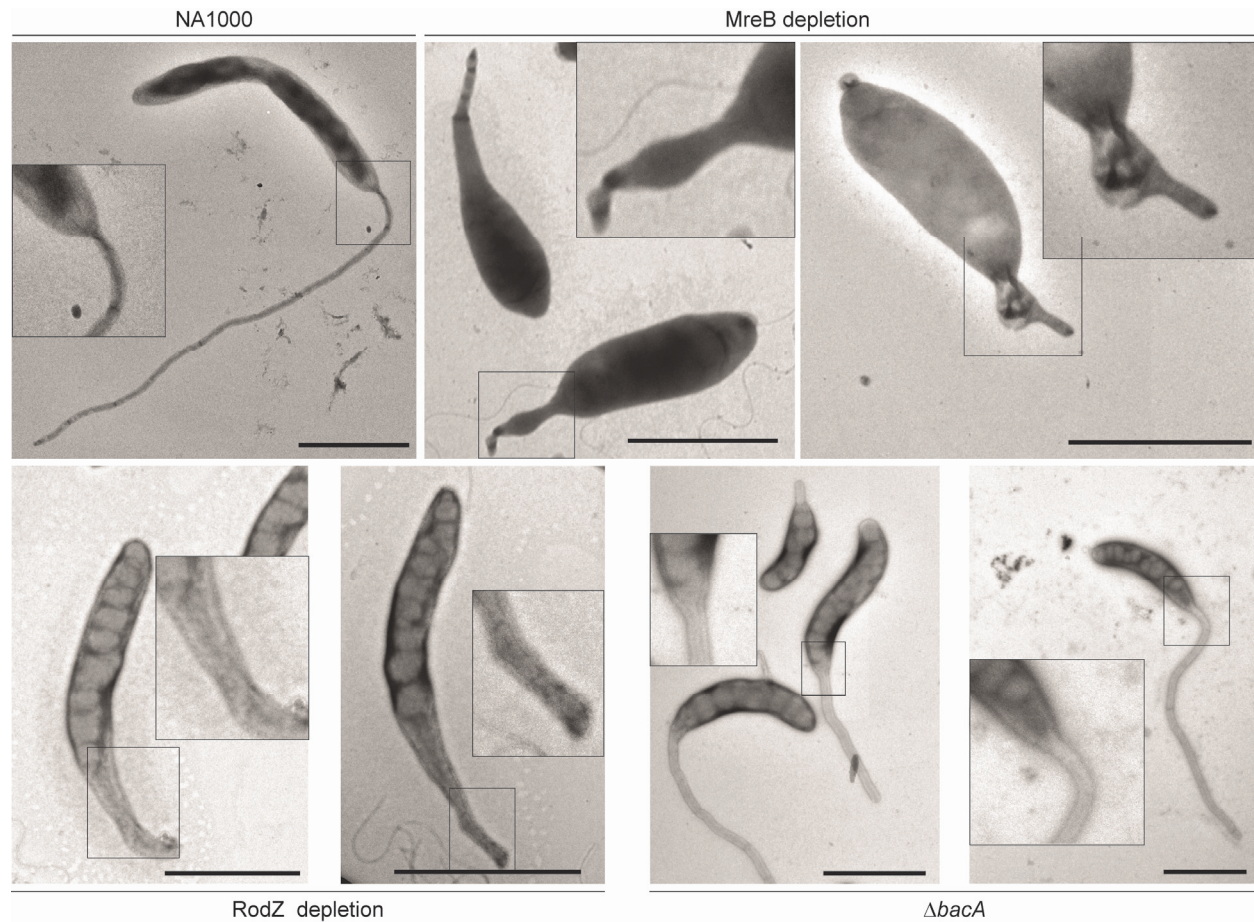

1164 **Figure 8—figure supplement 1.** Transmission electron micrographs of mutants lacking scaffolding proteins. Shown are cells of  
1165 strains NA1000 (WT), LS3809 ( $\Delta mreB$  P<sub>xyl</sub>::P<sub>xyl</sub>-*mreB*), CJW2747 ( $\Delta rodZ$ :: $\Omega$  P<sub>xyl</sub>::P<sub>xyl</sub>-*rodZ*), and MT257 ( $\Delta bacA$ ) that were stained  
1166 with uranyl acetate and visualized by transmission electron microscopy (scale bars: 2  $\mu$ m). Strains NA1000 and MT257 ( $\Delta bacA$ )  
1167 was grown in M2G<sup>-P</sup> for 24 h prior to imaging. Strains LS3809, and CJW2747 were grown to exponential phase in PYE medium  
1168 containing the inducer xylose, washed, cultivated for 7 h in inducer-free PYE medium, and then diluted (1:20) into M2G<sup>-P</sup> medium  
1169 24 h prior to imaging.

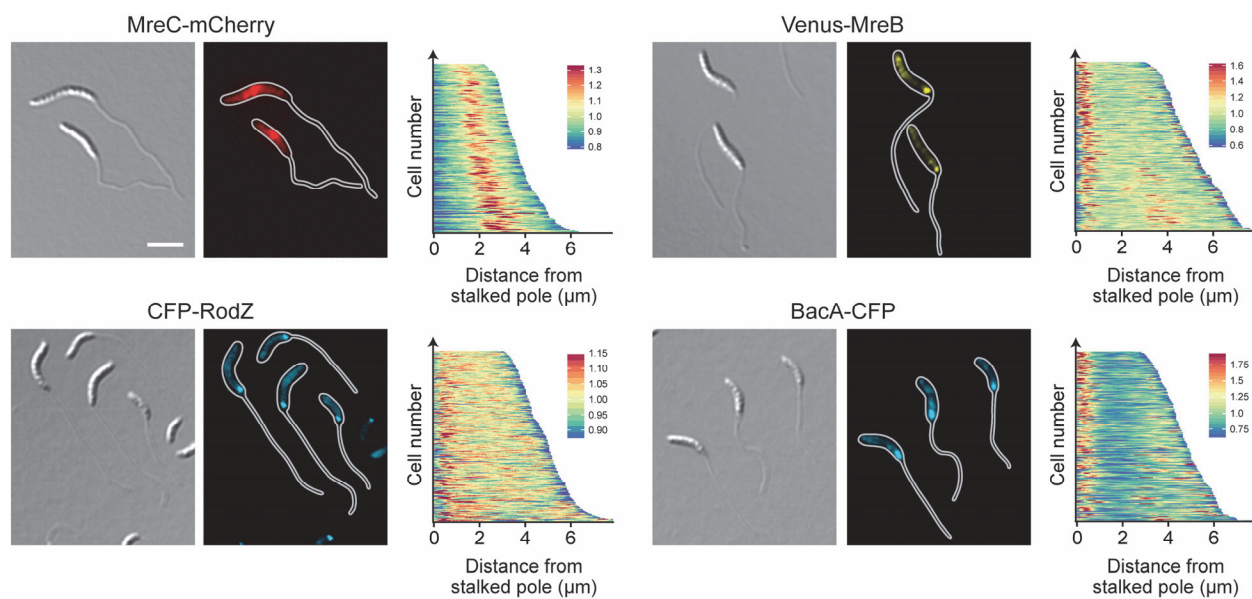

1170 **Figure 9. Localization of scaffolding proteins in phosphate-starved cells.** Shown is the localization of MreC-mCherry (MAB223,  
1171 PxyI::PxyI-mreC-mCherry), CFP-RodZ (CJW2745, *rodZ::cfp-rodZ*), Venus-MreB (MT309, PxyI::PxyI-venus-mreB), and BacA-CFP  
1172 (MT260, *bacA::bacA-cfp*) in cells cultivated for 24 h in M2G<sup>P</sup> medium (scale bars: 3  $\mu\text{m}$ ). Synthesis of the fluorescent protein  
1173 fusions was induced with 0.3% xylose 3 h prior to analysis. The population-wide distribution of fluorescence signals was quantified  
1174 by demographic analysis of random subpopulations of cells ( $n=200$  for each strain).

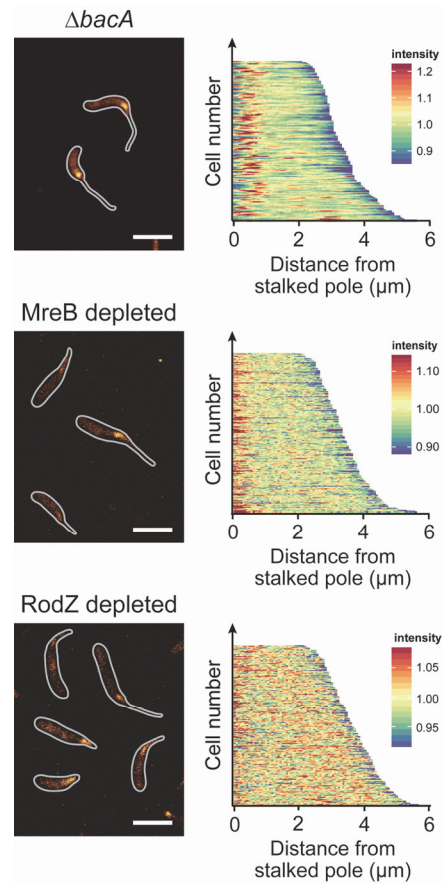

1175 **Figure 10. Cell wall biosynthesis in mutants lacking single scaffolding proteins.** Shown are fluorescence images of strains LS3809  
1176 ( $\Delta mreB$  P<sub>xyl</sub>::P<sub>xyl</sub>-*mreB*), and CJW2747 ( $\Delta rodZ::Q$  P<sub>xyl</sub>::P<sub>xyl</sub>-*rodZ*) cultivated as described in **Figure 8A** and subjected to HADA  
1177 staining (2 min). The population-wide distribution of HADA fluorescence was quantified by demographic analysis (n=200 for each  
1178 strain) (scale bars: 3  $\mu$ m).

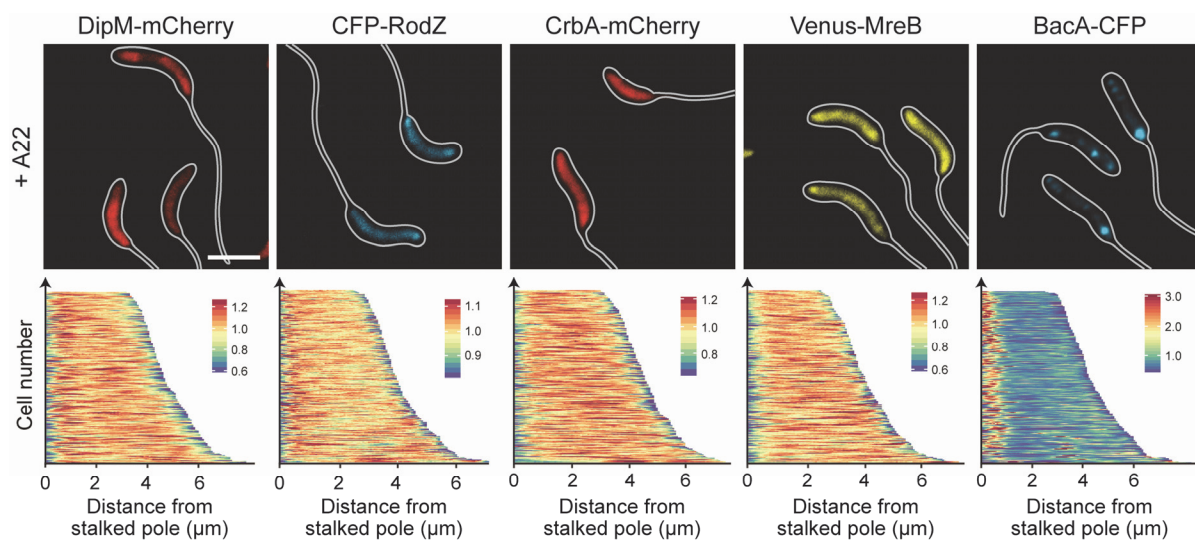

1179 **Figure 11. Role of MreB in the polar recruitment of factors involved in stalk formation.** Shown are fluorescence images of strains  
1180 AM208 (*Pxyl::Pxyl-dipM-mCherry*), CJW2745 (*rodZ::cfp-rodZ*), MAB247 (*Pxyl::Pxyl-crbA-mCherry*), MT309 (*Pxyl::Pxyl-venus-mreB*)  
1181 and MT260 (*bacA::bacA-cfp*). Cells were grown in PYE medium, diluted into M2G<sup>-P</sup> medium, and incubated for 23 h. Subsequently,  
1182 A22 (10 μg/ml) was added to the media, and cultivation was continued for 1 h prior to imaging. Strains AM208, MAB247, and  
1183 MT309 were induced for 3 h with 0.3% xylose to induce synthesis of the fusion proteins before analysis (scale bars: 3 μm).



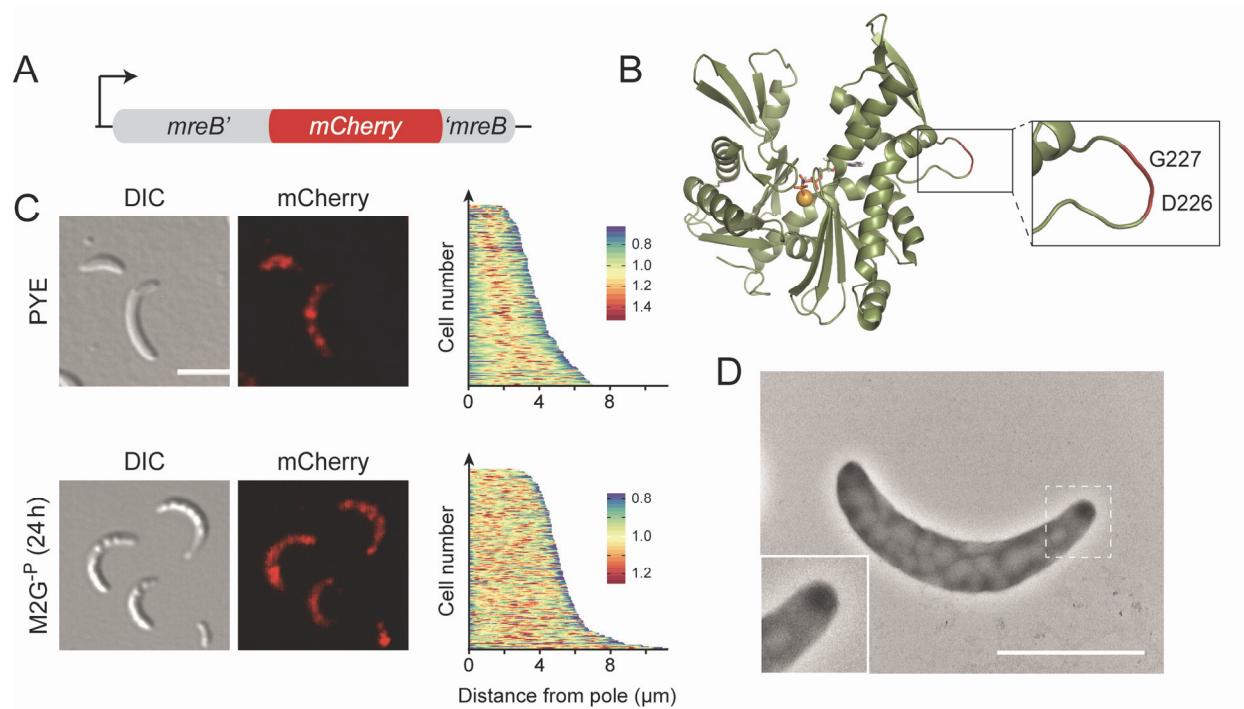

1184 **Figure 12. Abolishment of stalk formation in a strain producing an MreB sandwich fusion.** (A) Schematic representation of the  
1185 *mreB<sup>sw</sup>* allele. (B) Structure of *Caulobacter* MreB (PDB accession 4CZM; (van den Ent et al., 2014)). The inset shows the site used  
1186 to insert the mCherry tag. (C) DIC and fluorescence images of strain MAB238 (*mreB::mreB<sup>sw</sup>*) grown to exponential phase in PYE  
1187 medium or incubated for 24 h in M2G<sup>-P</sup> medium (scale bars: 3  $\mu$ m). The demographs on the right display the distribution of  
1188 mCherry fluorescence in random subpopulations of cells (n=210). (D) Transmission electron micrograph of MAB238 cells after  
1189 24 h of growth in M2G<sup>-P</sup> medium and staining with uranyl acetate (2%) (scale bar:2  $\mu$ m).

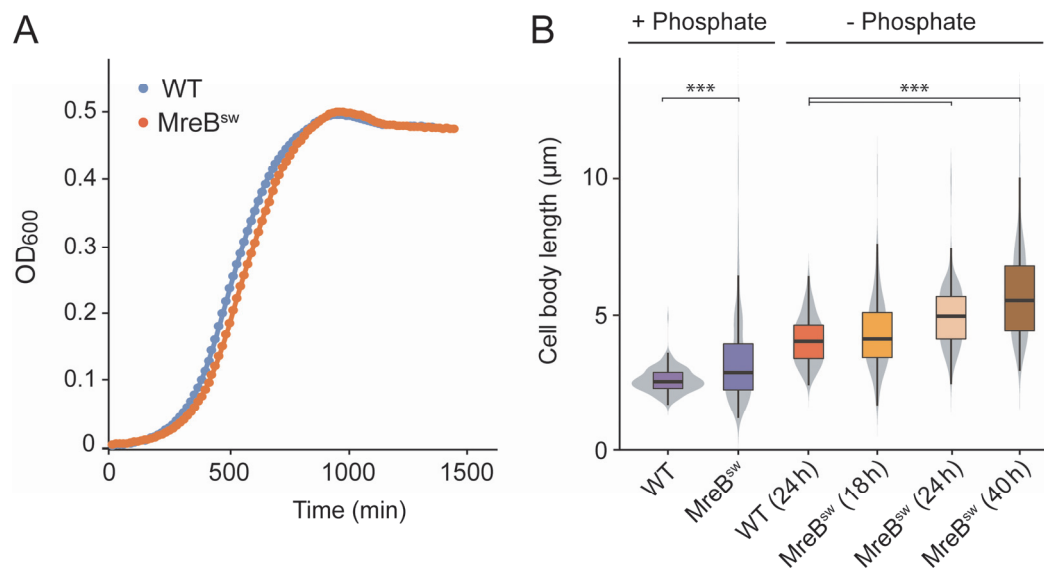

1190 **Figure 12–figure supplement 1. Growth characteristics of a strain producing an MreB-mCherry sandwich fusion.** (A) Growth  
1191 curves of strains NA1000 (WT) and MAB238 (*mreB*<sup>sw</sup>) in PYE medium. (B) Distribution of the cell body lengths in populations of  
1192 strains NA1000 (WT) and MAB238 (*mreB*<sup>sw</sup>) during exponential growth in PYE medium or after cultivation for 18 h, 24 h and 40  
1193 h in M2G<sup>-P</sup> medium. The values obtained (n=210 per strain) are shown as box plots, with the thick line indicating the median, the  
1194 box the interquartile range and the whiskers the 2<sup>nd</sup> and the 98<sup>th</sup> percentile. In addition rotated kernel density plots (grey) are  
1195 depicted for each dataset to indicate the distribution of the raw data (\*\*\*) p < 10<sup>-6</sup>; t-test).

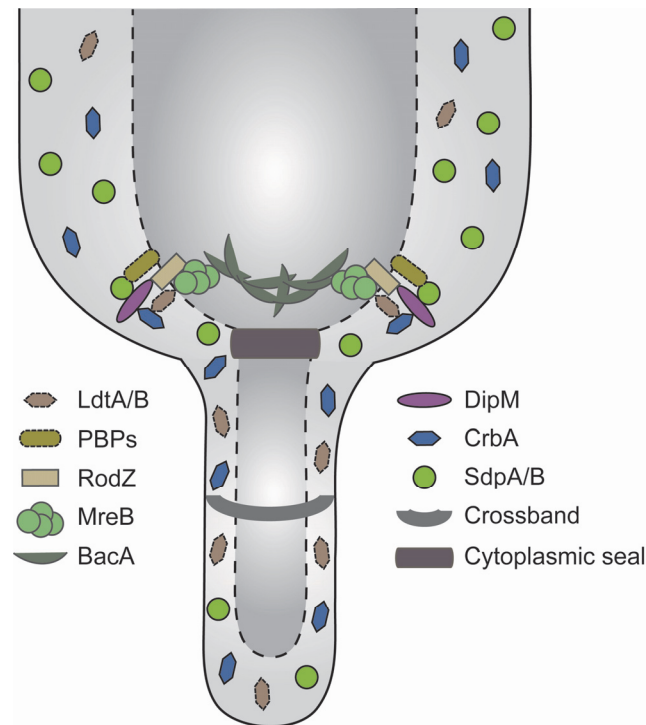

1196 **Figure 13. Model of the factors contributing to stalk formation.** The actin homolog MreB forms the basis of the stalk biosynthetic  
1197 complex and mediates the recruitment of both synthetic and lytic proteins to the stalked pole. The bactofilin BacA contributes to  
1198 stalk biosynthesis but is not essential to this process. In addition to the proteins that are stably associated with the cell pole,  
1199 diffusible periplasmic enzymes are transiently associated with the polar machinery or non-selectively trapped in the compart-  
1200 ments generated by the crossbands.

## Supplementary files

1201 **Supplementary file 1. Composition of cell body and stalk peptidoglycan from crossband- and LD-transpeptidase-**  
 1202 **deficient cells.** The indicated strains were analyzed after growth for 24 h in M2G<sup>-P</sup>. Values are the mean ± variance  
 1203 of two independent experiments.

| Muropeptide                                | Relative percentage (%) in strain      |                 |                       |                 |                       |                 |
|--------------------------------------------|----------------------------------------|-----------------|-----------------------|-----------------|-----------------------|-----------------|
|                                            | WT (CB15N)                             |                 | $\Delta$ <i>stpAB</i> |                 | $\Delta$ <i>ldtDX</i> |                 |
|                                            | Cell body                              | Stalk           | Cell body             | Stalk           | Cell body             | Stalk           |
| Tri                                        | 0.8±0.0                                | 1.4±0.0         | 1.5±0.0               | 3.3±0.0         | n.d.                  | n.d.            |
| Tetra                                      | 16.5±0.4                               | 11.1±6.6        | 19.3±0.3              | 12.1±3.5        | 19.3±0.1              | 13.6±0.0        |
| Penta                                      | 7.9±0.0                                | 6.5±0.1         | 8.9±0.0               | 6.6±0.0         | 8.6±0.0               | 7.8±0.0         |
| TriTri (LD)                                | 0.3±0.0                                | 0.9±0.0         | 0.2±0.1               | 1.2±0.2         | n.d.                  | n.d.            |
| TetraTri (LD)                              | 1.0±0.1                                | 2.9±0.1         | 0.6±0.0               | 2.2±0.2         | n.d.                  | n.d.            |
| TriAnh/TetraTri (LD)                       | 1.1±0.0                                | 1.3±0.0         | 1.1±0.0               | 1.9±0.0         | n.d.                  | n.d.            |
| TetraTetra(LD)                             | 1.3±1.1                                | 1.5±0.0         | 0.4±0.0               | 1.4±0.0         | 0.2±0.0               | 0.2±0.0         |
| TetraTetra                                 | 12.7±0.0                               | 10.8±1.5        | 14.6±0.1              | 10.4±0.1        | 14.3±0.0              | 13.5±0.0        |
| TetraPenta                                 | 6.8±0.1                                | 7.0±0.0         | 7.9±0.0               | 6.9±0.0         | 7.4±0.0               | 8.5±0.0         |
| TetraTetraTri or TetraTetraTri (LD)        | 0.3±0.0                                | 1.2±0.0         | 0.2±0.0               | 1.0±0.0         | n.d.                  | n.d.            |
| TetraAnh                                   | 1.4±0.0                                | 1.7±0.0         | 1.1±0.0               | 0.8±0.0         | 1.2±0.0               | 1.2±0.0         |
| TetraTetraTetra                            | 3.8±0.0                                | 5.1±0.0         | 4.1±0.0               | 4.8±0.1         | 4.2±0.0               | 5.9±0.0         |
| TetraTetraPenta                            | 1.8±0.0                                | 3.0±0.0         | 1.9±0.0               | 2.6±0.0         | 2.1±0.0               | 3.2±0.0         |
| TetraTetraTetraTetra                       | n.d.                                   | 0.3±0.2         | n.d.                  | 0.5±0.0         | n.d.                  | n.d.            |
| TetraTetraTetraPenta                       | n.d.                                   | 0.6±0.2         | n.d.                  | 0.3±0.0         | n.d.                  | n.d.            |
| PentaAnh                                   | 0.8±0.0                                | 1.6±0.2         | 0.7±0.0               | 1.4±0.0         | 0.8±0.0               | 1.7±0.0         |
| TetraTetraAnh                              | 1.0±0.0                                | 2.0±0.0         | 0.7±0.2               | 1.1±0.0         | 0.8±0.0               | 0.6±0.0         |
| TetraPentaAnh                              | 3.6±0.0                                | 3.1±0.0         | 2.3±0.0               | 1.9±0.0         | 2.5±0.0               | 2.6±0.0         |
| TetraTetraTriAnh or TetraTetraTri(LD)Anh   | 0.6±0.0                                | 1.3±0.0         | 0.7±0.0               | 1.8±0.0         | 1.3±0.0               | 1.9±0.0         |
| TetraTetraTetraAnh                         | 6.4±0.1                                | 6.2±0.0         | 6.8±0.0               | 6.2±0.0         | 6.8±0.0               | 6.8±0.0         |
| TetraTetraPentaAnh                         | 6.6±0.1                                | 6.2±0.0         | 6.4±0.0               | 5.7±0.1         | 6.7±0.0               | 6.6±0.0         |
| TetraTetraTetraPentaAnh I                  | 1.4±0.0                                | 1.0±0.0         | 1.3±0.0               | 1.1±0.2         | 1.4±0.0               | 2.0±0.0         |
| TetraTetraTetraPentaAnh II                 | 1.4±0.0                                | 1.3±0.0         | 1.5±0.0               | 1.2±0.0         | 1.7±0.0               | 1.8±0.0         |
| TetraTetraTetradiAnh                       | 1.4±0.0                                | 1.5±0.0         | 1.8±0.0               | 1.4±0.5         | 1.4±0.0               | 1.6±0.7         |
| TetraTetraTetraPentadiAnh                  | 1.8±0.3                                | 1.3±0.0         | 1.9±0.2               | 1.1±0.0         | 2.3±0.0               | 1.6±0.3         |
| TetraTetradiAnh                            | 1.8±0.0                                | 1.3±0.0         | 1.2±0.4               | 1.0±0.0         | 2.7±0.0               | 1.6±0.0         |
| TetraTetraPentadiAnh                       | 0.7±0.0                                | 0.4±0.0         | 0.7±0.0               | 0.4±0.0         | 0.9±0.0               | 0.8±0.0         |
| <b>all known</b>                           | <b>83.3±0.6</b>                        | <b>82.5±4.7</b> | <b>87.7±0.5</b>       | <b>80.3±0.0</b> | <b>86.5±0.0</b>       | <b>83.4±0.2</b> |
| <b>Monomers (total)</b>                    | <b>33.0±0.1</b>                        | <b>27.0±4.5</b> | <b>36.0±1.1</b>       | <b>30.1±4.3</b> | <b>34.6±0.3</b>       | <b>29.0±0.4</b> |
| <b>Dimers (total)</b>                      | <b>35.6±3.4</b>                        | <b>37.2±0.0</b> | <b>32.9±0.7</b>       | <b>34.8±1.6</b> | <b>32.2±0.0</b>       | <b>32.3±0.0</b> |
| <b>Trimers (total)</b>                     | <b>26.0±0.5</b>                        | <b>30.2±3.7</b> | <b>25.9±0.1</b>       | <b>29.9±4.1</b> | <b>27.0±0.1</b>       | <b>32.2±1.7</b> |
| <b>Tetramers (total)</b>                   | <b>5.4±0.6</b>                         | <b>5.5±0.2</b>  | <b>5.3±0.2</b>        | <b>5.2±1.4</b>  | <b>6.2±0.0</b>        | <b>6.5±0.4</b>  |
| <b>Tripeptides (total)</b>                 | <b>3.0±0.0</b>                         | <b>6.4±0.6</b>  | <b>3.1±0.0</b>        | <b>9.3±1.3</b>  | <b>0.5±0.0</b>        | <b>0.8±0.0</b>  |
| <b>Tetrapeptides (total)</b>               | <b>74.7±0.0</b>                        | <b>71.9±2.5</b> | <b>74.5±0.3</b>       | <b>69.2±1.3</b> | <b>77.6±0.0</b>       | <b>75.4±0.2</b> |
| <b>Pentapeptides (total)</b>               | <b>21.7±0.0</b>                        | <b>21.1±0.5</b> | <b>21.6±0.0</b>       | <b>20.2±0.0</b> | <b>21.5±0.0</b>       | <b>23.2±0.2</b> |
| <b>3-3 crosslinks</b>                      | <b>2.3±0.6</b>                         | <b>5.2±0.7</b>  | <b>1.0±0.0</b>        | <b>4.2±0.6</b>  | <b>0.6±0.0</b>        | <b>0.9±0.0</b>  |
| <b>Chain ends (Anh)</b>                    | <b>16.5±0.2</b>                        | <b>17.2±0.9</b> | <b>14.2±1.2</b>       | <b>14.5±0.8</b> | <b>17.0±0.0</b>       | <b>17.4±0.3</b> |
| <b>Degree of cross-linkage<sup>1</sup></b> | <b>39.2±0.0</b>                        | <b>42.9±2.2</b> | <b>37.6±0.4</b>       | <b>41.2±1.2</b> | <b>38.8±0.1</b>       | <b>42.5±0.2</b> |
| <b>% peptides in cross-links</b>           | <b>67.0±0.1</b>                        | <b>73.0±4.5</b> | <b>64.0±1.1</b>       | <b>69.9±4.3</b> | <b>65.4±0.3</b>       | <b>71.0±0.4</b> |
|                                            | Mean of disaccharides units ± SD (n=2) |                 |                       |                 |                       |                 |
| <b>Average glycan chain length</b>         | <b>6.0±0.1</b>                         | <b>5.8±0.1</b>  | <b>7.1±0.3</b>        | <b>6.9±0.2</b>  | <b>5.9±0.0</b>        | <b>5.8±0.0</b>  |

**Supplementary file 2. List of mutant strains analyzed for stalk defects.**

| <b><i>LytM-like endopeptidases</i></b>               |                                                                                                                                                                                                                                                                                                                           |
|------------------------------------------------------|---------------------------------------------------------------------------------------------------------------------------------------------------------------------------------------------------------------------------------------------------------------------------------------------------------------------------|
| <b>Locus Tags</b>                                    | <i>ldpA</i> (CC1872, CCNA_01948), <i>ldpB</i> (CC2248, CCNA_02331), <i>ldpC</i> (CC2297, CCNA_02382), <i>ldpD</i> (CC3034, CCNA_03129), <i>ldpE</i> (CC3301, CCNA_03410), <i>ldpF</i> (CC3434, CCNA_03547), <i>dipM</i> (CC1996, CCNA_02075)                                                                              |
| <b>Single deletion</b>                               | $\Delta ldpA$ , $\Delta ldpB$ , $\Delta ldpC$ , $\Delta ldpD$ , $\Delta ldpE$ , $\Delta ldpF$ , $\Delta dipM$                                                                                                                                                                                                             |
| <b>Multiple deletions</b>                            | $\Delta ldpA \Delta ldpB \Delta ldpC \Delta ldpD \Delta ldpE$ , $\Delta ldpA \Delta ldpB$ , $\Delta ldpB \Delta ldpF$ , $\Delta ldpA \Delta ldpB \Delta ldpC$ , $\Delta ldpA \Delta ldpC \Delta ldpD$ , $\Delta ldpC \Delta ldpD \Delta ldpE$ , $\Delta ldpA \Delta ldpB \Delta ldpC \Delta ldpD \Delta ldpE \Delta ldpF$ |
| <b><i>NlpC/P60 and CHAP domain proteins</i></b>      |                                                                                                                                                                                                                                                                                                                           |
| <b>Locus Tags</b>                                    | CC2936 (CCNA_03031), CC0349 (CCNA_00354), CC2775 (CCNA_02863)                                                                                                                                                                                                                                                             |
| <b>Single deletions</b>                              | $\Delta CC2936$ , $\Delta CC0349$ , $\Delta CC2775$                                                                                                                                                                                                                                                                       |
| <b>Multiple deletions</b>                            | $\Delta CC2775 \Delta CC2936$ , $\Delta CC2936 \Delta CC0349 \Delta CC2775$                                                                                                                                                                                                                                               |
| <b><i>Soluble lytic transglycosylases</i></b>        |                                                                                                                                                                                                                                                                                                                           |
| <b>Locus Tags</b>                                    | <i>sdpA</i> (CC1194, CCNA_01252), <i>sdpB</i> (CC1332, CCNA_01393), <i>sdpC</i> (CC2416, CCNA_02498)                                                                                                                                                                                                                      |
| <b>Single deletions</b>                              | $\Delta sdpA$ , $\Delta sdpB$ , $\Delta sdpC$                                                                                                                                                                                                                                                                             |
| <b>Multiple deletions</b>                            | $\Delta sdpB \Delta sdpC$ , $\Delta sdpA \Delta sdpC$ , $\Delta sdpA \Delta sdpB$                                                                                                                                                                                                                                         |
| <b><i>Membrane-bound lytic transglycosylases</i></b> |                                                                                                                                                                                                                                                                                                                           |
| <b>Locus Tags</b>                                    | CC3740 (CCNA_03856), CC3322 (CCNA_03431)                                                                                                                                                                                                                                                                                  |
| <b>Single deletions</b>                              | $\Delta CC3740$ , $\Delta CC3322$                                                                                                                                                                                                                                                                                         |
| <b>Multiple deletions</b>                            | $\Delta CC3740 \Delta CC3322$                                                                                                                                                                                                                                                                                             |
| <b><i>Amidase</i></b>                                |                                                                                                                                                                                                                                                                                                                           |
| <b>Locus Tags</b>                                    | <i>amiC</i> (CC1876, CCNA_01952)                                                                                                                                                                                                                                                                                          |
| <b>Single deletions</b>                              | $\Delta amiC$ PxyI::PxyI- <i>amiC</i>                                                                                                                                                                                                                                                                                     |
| <b><i>Carboxypeptidase</i></b>                       |                                                                                                                                                                                                                                                                                                                           |
| <b>Locus Tags</b>                                    | <i>crbA</i> ( $\Delta CC2161$ , CCNA_02243)                                                                                                                                                                                                                                                                               |
| <b>Single deletions</b>                              | $\Delta CC2161$                                                                                                                                                                                                                                                                                                           |
| <b><i>LD-transpeptidases</i></b>                     |                                                                                                                                                                                                                                                                                                                           |
| <b>Locus Tags</b>                                    | <i>ldtD</i> (CC1511, CCNA_01579), <i>ldtX</i> (CC3744, CCNA_03860)                                                                                                                                                                                                                                                        |
| <b>Single deletions</b>                              | $\Delta ldtD$ , $\Delta ldtX$                                                                                                                                                                                                                                                                                             |
| <b>Multiple deletions</b>                            | $\Delta ldtD \Delta ldtX$                                                                                                                                                                                                                                                                                                 |
| <b><i>Penicillin-binding proteins (class A)</i></b>  |                                                                                                                                                                                                                                                                                                                           |
| <b>Locus Tags</b>                                    | <i>pbpY</i> (CC1875, CCNA_01951), <i>pbp1A</i> (CC1516, CCNA_01584), <i>pbpC</i> (CC3277, CCNA_03386), <i>pbpZ</i> (CC3570, CCNA_03685), <i>pbpX</i> (CC0252, CCNA_00252)                                                                                                                                                 |
| <b>Single deletions</b>                              | $\Delta pbpC$ , $\Delta pbpX$                                                                                                                                                                                                                                                                                             |
| <b>Multiple deletions</b>                            | $\Delta pbp1\alpha \Delta pbpC \Delta pbpY \Delta pbpZ$ , $\Delta pbp1\alpha \Delta pbpY \Delta pbpZ$ , $\Delta pbp1\alpha \Delta pbpC \Delta pbpY \Delta pbpZ$ PxyI::PxyI- <i>pbpX</i>                                                                                                                                   |

1204 **Supplementary file 3. Composition of peptidoglycan isolated from autolysin-deficient cells.** The indicated strains  
 1205 were analyzed after growth for 24 h in M2G<sup>P</sup>. The values are the mean ± variance of two independent experiments.

| Muropeptide                              | Relative percentage (%) in strain |               |               |               |                |
|------------------------------------------|-----------------------------------|---------------|---------------|---------------|----------------|
|                                          | WT                                | $\Delta dipM$ | $\Delta crbA$ | $\Delta ldpA$ | $\Delta sdpAB$ |
| Tri                                      | 0.9±0.0                           | 1.8±0.1       | 0.6±0.0       | 1.1±0.0       | 4.3±2.1        |
| Tetra                                    | 17.5±0.0                          | 21.3±0.5      | 9.8±0.5       | 18.2±0.1      | 27.5±1.8       |
| Penta                                    | 7.9±0.1                           | 8.1±0.3       | 11.0±0.0      | 7.4±0.0       | 6.6±0.0        |
| TriTri (LD)                              | 0.2±0.0                           | 0.2±0.0       | 0.2±0.0       | 0.2±0.0       | 0.5±0.0        |
| TetraTri (LD)                            | 1.1±0.0                           | 0.9±0.0       | 0.2±0.0       | 0.8±0.0       | 1.9±0.0        |
| TriAnh +small amount of TetraTri (LD)    | 0.9±0.0                           | 1.0±0.0       | 0.5±0.0       | 0.9±0.0       | 1.6±0.3        |
| TetraTetra (LD)                          | 0.2±0.0                           | 0.5±0.0       | 1.1±0.0       | 0.9±0.5       | 0.6±0.0        |
| TetraTetra                               | 15.1±0.0                          | 15.9±0.0      | 10.8±0.3      | 15.8±0.0      | 16.7±0.8       |
| TetraPenta                               | 7.3±0.2                           | 7.3±0.1       | 12.1±0.1      | 7.1±0.1       | 5.3±0.0        |
| TetraTetraTri or TetraTetraTri (LD)      | 0.4±0.0                           | 0.3±0.0       | 0.3±0.0       | 0.3±0.0       | 0.4±0.0        |
| TetraAnh                                 | 0.3±0.0                           | 0.5±0.0       | 0.2±0.0       | 0.5±0.0       | 0.8±0.0        |
| TetraTetraTetra                          | 4.4±0.1                           | 4.5±0.0       | 3.5±0.2       | 4.6±0.0       | 5.5±0.2        |
| TetraTetraPenta                          | 1.8±0.0                           | 1.8±0.0       | 3.6±0.0       | 1.8±0.0       | 1.5±0.0        |
| TetraTetraTetraTetra                     | 0.8±0.0                           | 0.8±0.0       | 0.6±0.0       | 0.8±0.0       | 1.1±0.0        |
| TetraTetraTetraPenta                     | 0.4±0.0                           | 0.4±0.0       | 0.6±0.0       | 0.4±0.0       | 0.4±0.0        |
| PentaAnh                                 | 0.8±0.0                           | 0.8±0.0       | 0.8±0.0       | 0.8±0.0       | 1.7±0.0        |
| TetraTetraAnh                            | 4.3±0.0                           | 3.9±0.0       | 3.0±0.0       | 4.1±0.0       | 2.6±0.0        |
| TetraPentaAnh                            | 0.9±0.0                           | 0.8±0.0       | 0.4±0.1       | 0.6±0.0       | 0.9±0.1        |
| TetraTetraTriAnh or TetraTetraTri(LD)Anh | n.d.                              | n.d.          | n.d.          | n.d.          | n.d.           |
| TetraTetraTetraAnh                       | 7.6±0.1                           | 7.1±0.0       | 5.6±0.0       | 7.6±0.0       | 6.4±0.0        |
| TetraTetraPentaAnh                       | 6.4±0.5                           | 5.9±0.1       | 7.0±0.0       | 7.0±0.0       | 4.0±0.0        |
| TetraTetraTetraPentaAnh I                | 1.2±0.0                           | 1.2±0.0       | 1.3±0.0       | 1.3±0.0       | 1.0±0.0        |
| TetraTetraTetraPentaAnh II               | 1.3±0.0                           | 1.3±0.0       | 2.3±0.0       | 1.4±0.0       | 0.7±0.0        |
| TetraTetraTetradiAnh                     | 1.1±0.0                           | 1.0±0.0       | 1.1±0.0       | 1.2±0.0       | 0.5±0.0        |
| TetraTetraTetraPentadiAnh                | 0.9±0.0                           | 0.9±0.0       | 1.3±0.0       | 1.0±0.0       | 0.3±0.0        |
| TetraTetradiAnh                          | 1.5±0.0                           | 1.4±0.0       | 1.8±0.0       | 1.5±0.0       | 0.4±0.0        |
| TetraTetraPentadiAnh                     | 0.7±0.0                           | 0.6±0.0       | 1.2±0.0       | 0.7±0.0       | 0.3±0.0        |
| all known                                | 85.7±1.7                          | 90.1±1.0      | 80.6±0.0      | 87.9±0.1      | 93.4±0.5       |
| Monomers (total)                         | 32.9±0.5                          | 37.3±2.1      | 28.4±0.2      | 32.9±0.1      | 45.4±1.5       |
| Dimers (total)                           | 35.7±1.7                          | 34.1±0.0      | 36.5±1.4      | 35.2±1.1      | 31.0±0.2       |
| Trimers (total)                          | 26.0±1.5                          | 23.6±1.1      | 27.6±1.3      | 26.5±0.1      | 20.0±0.4       |
| Tetramers (total)                        | 5.4±0.6                           | 5.1±0.3       | 7.4±0.2       | 5.5±0.3       | 3.7±0.0        |
| Tripeptides (total)                      | 3.1±0.0                           | 4.0±0.2       | 1.8±0.3       | 3.0±0.0       | 8.1±5.4        |
| Tetrapeptides (total)                    | 77.1±0.2                          | 77.0±0.6      | 68.9±0.6      | 77.9±0.0      | 76.3±6.9       |
| Pentapeptides (total)                    | 19.5±0.1                          | 18.5±0.2      | 29.0±0.0      | 18.5±0.1      | 14.8±0.0       |
| 3-3 crosslinks                           | 1.0±0.0                           | 1.0±0.0       | 1.0±0.0       | 1.2±0.2       | 1.8±0.0        |
| Chain ends (Anh)                         | 15.0±0.2                          | 13.9±0.1      | 15.2±0.4      | 15.1±0.0      | 11.6±1.0       |
| Degree of cross-linkage <sup>1</sup>     | 39.2±0.6                          | 36.6±1.1      | 42.2±0.2      | 39.3±0.0      | 31.6±0.5       |
| % Peptides in crosslinks                 | 67.1±0.5                          | 62.7±2.1      | 71.6±0.2      | 67.1±0.1      | 54.6±1.5       |
| Mean of disaccharides units ± SD (n=2)   |                                   |               |               |               |                |
| Average glycan chain length              | 6.7±0.0                           | 7.2±0.0       | 6.6±0.1       | 6.6±0.0       | 8.6±0.6        |

1206 **Supplementary file 4. Composition of peptidoglycan isolated from cells with defects in scaffolding proteins.** Strains  
 1207 MT257 ( $\Delta bacA$ ), MAB238 ( $mreB::mreB^{SW}$ ), and NA1000 (WT) were grown for 24 h in M2G<sup>-P</sup> prior to analysis. Strains  
 1208 CJW2747 ( $\Delta rodZ::\Omega P_{xyl}::P_{xyl}-rodZ$ ) and LS3809 ( $\Delta mreB P_{xyl}::P_{xyl}-mreB$ ) were first cultivated for 7 h in PYE and then  
 1209 grown for 24 h in M2G<sup>-P</sup>. Values are the mean values  $\pm$  variance of two independent experiments.

| Muropeptide                                                | Relative percentage (%) in strain |               |            |            |                    |
|------------------------------------------------------------|-----------------------------------|---------------|------------|------------|--------------------|
|                                                            | WT                                | $\Delta bacA$ | RodZ depl. | MreB depl. | MreB <sup>SW</sup> |
| Tri                                                        | 0.9±0.0                           | 1.4±0.0       | 5.0±0.0    | 5.1±0.1    | 3.8±0.0            |
| Tetra                                                      | 17.5±0.0                          | 19.6±0.0      | 17.7±0.2   | 17.4±0.0   | 19.2±0.1           |
| Penta                                                      | 7.9±0.1                           | 8.0±0.1       | 8.3±0.0    | 8.7±0.0    | 7.3±0.0            |
| TriTri (LD)                                                | 0.2±0.0                           | 0.2±0.0       | 0.8±0.0    | 1.0±0.0    | 0.5±0.0            |
| TetraTri (LD)                                              | 1.1±0.0                           | 0.7±0.0       | 1.9±0.0    | 2.5±0.0    | 1.9±0.0            |
| TriAnh/TetraTri (LD)                                       | 0.9±0.0                           | 1.1±0.0       | 3.6±0.0    | 3.7±0.0    | 3.0±0.0            |
| TetraTetra (LD)                                            | 0.2±0.0                           | 0.4±0.0       | 1.1±0.0    | 1.3±0.0    | 0.9±0.0            |
| TetraTetra                                                 | 15.1±0.0                          | 16.8±0.2      | 13.6±0.0   | 13.3±0.1   | 15.8±0.0           |
| TetraPenta                                                 | 7.3±0.2                           | 7.7±0.0       | 6.4±0.0    | 6.8±0.0    | 5.9±0.0            |
| TetraTetraTri or TetraTetraTri (LD)                        | 0.4±0.0                           | 0.3±0.0       | 0.6±0.0    | 0.7±0.0    | 0.6±0.0            |
| TetraAnh                                                   | 0.3±0.0                           | 0.5±0.0       | 0.9±0.0    | 0.8±0.0    | 0.8±0.0            |
| TetraTetraTetra                                            | 4.4±0.1                           | 5.0±0.0       | 3.7±0.0    | 3.1±0.0    | 4.4±0.0            |
| TetraTetraPenta                                            | 1.8±0.0                           | 1.9±0.0       | 1.4±0.0    | 1.3±0.0    | 1.3±0.0            |
| TetraTetraTetraTetra                                       | 0.8±0.0                           | 0.9±0.0       | 0.3±0.0    | 0.3±0.0    | 0.2±0.0            |
| TetraTetraTetraPenta                                       | 0.4±0.0                           | 0.4±0.0       | 0.1±0.0    | 0.2±0.0    | 0.1±0.0            |
| PentaAnh                                                   | 0.8±0.0                           | 0.9±0.0       | 0.6±0.0    | 0.5±0.0    | 0.7±0.0            |
| TetraTetraAnh                                              | 4.3±0.0                           | 4.2±0.0       | 0.7±0.0    | 0.7±0.0    | 0.6±0.0            |
| TetraPentaAnh                                              | 0.9±0.0                           | 0.8±0.0       | 2.2±0.0    | 2.2±0.0    | 2.2±0.0            |
| TetraTetraTriAnh or<br>TetraTetraTri(LD)Anh                | n.d.                              | n.d.          | 1.5±0.0    | 1.5±0.0    | 1.4±0.0            |
| TetraTetraTetraAnh                                         | 7.6±0.1                           | 7.0±0.0       | 5.5±0.0    | 4.9±0.1    | 6.1±0.0            |
| TetraTetraPentaAnh                                         | 6.4±0.5                           | 6.1±0.0       | 4.3±0.1    | 4.1±0.0    | 4.7±0.0            |
| TetraTetraTetraPentaAnh I                                  | 1.2±0.0                           | 1.3±0.0       | 0.6±0.0    | 0.4±0.0    | 0.7±0.0            |
| TetraTetraTetraPentaAnh II                                 | 1.3±0.0                           | 1.3±0.0       | 0.6±0.0    | 0.5±0.0    | 0.7±0.0            |
| TetraTetraTetradiAnh                                       | 1.1±0.0                           | 1.0±0.0       | 1.0±0.0    | 0.7±0.0    | 0.9±0.0            |
| TetraTetraTetraPentadiAnh                                  | 0.9±0.0                           | 0.9±0.0       | 1.3±0.0    | 1.0±0.0    | 1.3±0.0            |
| TetraTetradiAnh                                            | 1.5±0.0                           | 1.2±0.0       | 1.3±0.0    | 1.1±0.0    | 1.2±0.0            |
| TetraTetraPentadiAnh                                       | 0.7±0.0                           | 0.6±0.0       | 0.4±0.0    | 0.4±0.0    | 0.3±0.0            |
| all known                                                  | 85.7±1.7                          | 90.2±0.0      | 85.3±0.1   | 84.4±0.2   | 86.4±0.1           |
| Monomers (total)                                           | 32.9±0.5                          | 35.1±0.0      | 38.2±0.6   | 38.6±0.3   | 36.8±0.2           |
| Dimers (total)                                             | 35.7±1.7                          | 35.4±0.0      | 36.9±0.1   | 38.7±0.0   | 36.8±0.0           |
| Trimers (total)                                            | 26.0±1.5                          | 24.3±0.0      | 21.5±0.2   | 19.7±0.1   | 22.8±0.1           |
| Tetramers (total)                                          | 5.4±0.6                           | 5.2±0.0       | 3.4±0.0    | 2.9±0.0    | 3.5±0.0            |
| Tripeptides (total)                                        | 3.1±0.0                           | 3.5±0.0       | 10.8±0.0   | 11.8±0.4   | 8.5±0.1            |
| Tetrapeptides (total)                                      | 77.1±0.2                          | 77.0±0.0      | 70.6±0.0   | 69.1±0.6   | 74.3±0.0           |
| Pentapeptides (total)                                      | 19.5±0.1                          | 18.9±0.0      | 18.6±0.0   | 19.1±0.0   | 17.2±0.0           |
| 3-3 crosslinks                                             | 1.0±0.0                           | 0.8±0.0       | 3.0±0.0    | 3.7±0.0    | 2.6±0.0            |
| Chain ends (Anh)                                           | 15.0±0.2                          | 14.1±0.0      | 11.3±0.0   | 10.4±0.0   | 11.4±0.1           |
| Degree of cross-linkage <sup>1</sup>                       | 39.2±0.6                          | 37.8±0.0      | 35.3±0.2   | 34.7±0.1   | 36.3±0.1           |
| % peptides in cross-links                                  | 67.1±0.5                          | 64.9±0.0      | 61.8±0.6   | 61.4±0.3   | 63.2±0.2           |
| Mean of disaccharides units $\pm$ standard deviation (n=2) |                                   |               |            |            |                    |
| Average glycan chain length                                | 6.7±0.0                           | 7.1±0.0       | 8.8±0.0    | 9.6±0.0    | 8.8±0.0            |

## Supplementary file 5. Strains, plasmids and oligonucleotides.

### C. *crenscentus* strains used in this study.

| Strain  | Genotype/description                                                                       | Construction                                                  | References                     |
|---------|--------------------------------------------------------------------------------------------|---------------------------------------------------------------|--------------------------------|
| CB15N   | Synchronizable wild-type strain                                                            | -                                                             | Evinger & Agabian (1977)       |
| AM208   | CB15N P <sub>xyi</sub> ::P <sub>xyi</sub> - <i>dipM</i> -mCherry                           | -                                                             | Möll <i>et al.</i> (2010)      |
| AM364   | CB15N $\Delta$ <i>ldpA</i>                                                                 | -                                                             | Zielinska <i>et al.</i> (2017) |
| AM376   | CB15N $\Delta$ <i>crbA</i> (CCNA_02243)                                                    | In frame deletion of CCNA_02243 in CB15N using pAM152         | This study                     |
| AM457   | CB15N P <sub>xyi</sub> ::P <sub>xyi</sub> - <i>venus-pbpY</i>                              | -                                                             | Strobel <i>et al.</i> (2014)   |
| AM458   | CB15N P <sub>xyi</sub> ::P <sub>xyi</sub> - <i>venus-pbpZ</i>                              | -                                                             | Strobel <i>et al.</i> (2014)   |
| AM480   | CB15N P <sub>xyi</sub> ::P <sub>xyi</sub> - <i>sdpA</i> -mCherry                           | -                                                             | Zielinska <i>et al.</i> (2017) |
| AZ22    | CB15N $\Delta$ <i>sdpAB</i>                                                                | -                                                             | Zielinska <i>et al.</i> (2017) |
| AZ52    | CB15N $\Delta$ <i>ldpABCDEF</i>                                                            | -                                                             | Zielinska <i>et al.</i> (2017) |
| AZ85    | CB15N $\Delta$ CCNA_02863                                                                  | In frame deletion of CCNA_02863 in CB15N using pAZ12          | This study                     |
| AZ89    | CB15N $\Delta$ CCNA_02863 $\Delta$ CCNA_00354                                              | In frame deletion of CCNA_00354 in AZ85 using pAZ11           | This study                     |
| AZ127   | CB15N P <sub>xyi</sub> ::P <sub>xyi</sub> - <i>torA'</i> - <i>sdpB</i> -mCherry            | -                                                             | Zielinska <i>et al.</i> (2017) |
| AZ137   | CB15N $\Delta$ CCNA_01579 ( <i>ldtD</i> )                                                  | In frame deletion of CCNA_01579 in CB15N using pAZ26          | This study                     |
| AZ138   | CB15N $\Delta$ <i>ldtD</i> $\Delta$ <i>ldtX</i>                                            | In frame deletion of CCNA_03860 in AZ137 using pAZ30          | This study                     |
| AZ140   | CB15N $\Delta$ CCNA_03860 ( <i>ldtX</i> )                                                  | In frame deletion of CCNA_03860 in CB15N using pAZ30          | This study                     |
| CJW2745 | CB15N <i>rodZ</i> :: <i>cfp-rodZ</i>                                                       | -                                                             | Alyahya <i>et al.</i> (2009)   |
| CJW2747 | CB15N $\Delta$ <i>rodZ</i> :: $\Omega$ P <sub>xyi</sub> ::P <sub>xyi</sub> - <i>rodZ</i>   | -                                                             | Alyahya <i>et al.</i> (2009)   |
| JK305   | CB15N $\Delta$ <i>pbpA1</i> $\Delta$ <i>pbpC</i> $\Delta$ <i>pbpY</i> $\Delta$ <i>pbpZ</i> | -                                                             | Strobel <i>et al.</i> (2014)   |
| KK1     | CB15N $\Delta$ <i>pbpX</i>                                                                 | -                                                             | Strobel <i>et al.</i> (2014)   |
| KK12    | CB15N $\Delta$ <i>pbp1A</i> $\Delta$ <i>pbpY</i> $\Delta$ <i>pbpZ</i>                      | -                                                             | Strobel <i>et al.</i> (2014)   |
| KK33    | CB15N P <sub>xyi</sub> ::P <sub>xyi</sub> - <i>venus-pbp1A</i>                             | -                                                             | Strobel <i>et al.</i> (2014)   |
| LS3809  | CB15N $\Delta$ <i>mreB</i> P <sub>xyi</sub> ::P <sub>xyi</sub> - <i>mreB</i>               | -                                                             | Gitai <i>et al.</i> (2004)     |
| LS4275  | CB15N $\Delta$ <i>mreC</i> P <sub>xyi</sub> ::P <sub>xyi</sub> - <i>mreC</i>               | -                                                             | Dye <i>et al.</i> (2005)       |
| MAB223  | CB15N P <sub>xyi</sub> ::P <sub>xyi</sub> - <i>mreC</i> -mCherry                           | Integration of pMAB66 in CB15N                                | This study                     |
| MAB233  | CB15N $\Delta$ CCNA_03431                                                                  | In frame deletion of CCNA_03431 in CB15N using pMAB70         | This study                     |
| MAB238  | CB15N <i>mreB</i> :: <i>mreB</i> <sup>SW</sup>                                             | In frame integration of pMAB64 in CB15N                       | This study                     |
| MAB239  | CB15N $\Delta$ CCNA_03856                                                                  | In frame deletion of CCNA_03856 in CB15N using pMAB60         | This study                     |
| MAB244  | CB15N <i>pbp2</i> :: <i>gfp-pbp2</i>                                                       | In frame integration of <i>gfp-pbp2</i> in CB15N using pMAB67 | This study                     |
| MAB247  | CB15N P <sub>xyi</sub> ::P <sub>xyi</sub> - <i>crbA</i> -mCherry                           | Integration of pMT719 in CB15N                                | This study                     |
| MAB248  | CB15N $\Delta$ CCNA_03031                                                                  | In frame deletion of CCNA_03031 in CB15N using pMAB62         | This study                     |
| MAB250  | CB15N $\Delta$ CCNA_02863 $\Delta$ CCNA_00354 $\Delta$ CCNA_03031                          | In frame deletion of CCNA_03031 in AZ89 using pMAB62          | This study                     |
| MAB251  | CB15N $\Delta$ CCNA_03856 $\Delta$ CCNA_03431                                              | In frame deletion of CCNA_03431 in MAB239 using pMAB70        | This study                     |
| MAB315  | CB15N $\Delta$ <i>crbA</i> P <sub>xyi</sub> ::P <sub>xyi</sub> - <i>venus-mreB</i>         | Integration of pMT1003 in AM376                               | This study                     |
| MAB316  | CB15N $\Delta$ <i>crbA</i> P <sub>xyi</sub> ::P <sub>xyi</sub> - <i>dipM</i> -mCherry      | Integration of pMT795 in AM376                                | This study                     |
| MAB317  | CB15N $\Delta$ <i>crbA</i> P <sub>xyi</sub> ::P <sub>xyi</sub> - <i>bacA</i> - <i>cfp</i>  | Integration of pMT810 in AM376                                | This study                     |
| MAB318  | CB15N $\Delta$ <i>bacA</i> P <sub>xyi</sub> ::P <sub>xyi</sub> - <i>crbA</i> -mCherry      | Integration of pMT719 in JK55                                 | This study                     |
| MAB319  | CB15N $\Delta$ <i>bacA</i> P <sub>xyi</sub> ::P <sub>xyi</sub> - <i>venus-mreB</i>         | Integration of pMT1003 in JK55                                | This study                     |
| MAB320  | CB15N $\Delta$ <i>dipM</i> P <sub>xyi</sub> ::P <sub>xyi</sub> - <i>bacA</i> - <i>cfp</i>  | Integration of pMT810 in MT258                                | This study                     |
| MAB 321 | CB15N $\Delta$ <i>dipM</i> P <sub>xyi</sub> ::P <sub>xyi</sub> - <i>crbA</i> -mCherry      | Integration of pMT719 in MT258                                | This study                     |
| MAB322  | CB15N $\Delta$ <i>dipM</i> P <sub>xyi</sub> ::P <sub>xyi</sub> - <i>venus-mreB</i>         | Integration of pMT1003 in MT258                               | This study                     |
| MAB323  | CB15N $\Delta$ <i>sdpAB</i> P <sub>xyi</sub> ::P <sub>xyi</sub> - <i>bacA</i> - <i>cfp</i> | Integration of pMT810 in AZ22                                 | This study                     |
| MAB324  | CB15N $\Delta$ <i>sdpAB</i> P <sub>xyi</sub> ::P <sub>xyi</sub> - <i>crbA</i> -mCherry     | Integration of pMT719 in AZ22                                 | This study                     |
| MAB325  | CB15N $\Delta$ <i>ldpA</i> P <sub>xyi</sub> ::P <sub>xyi</sub> - <i>venus-mreB</i>         | Integration of pMT1003 in AM364                               | This study                     |
| MAB326  | CB15N $\Delta$ <i>ldpA</i> P <sub>xyi</sub> ::P <sub>xyi</sub> - <i>dipM</i> -mCherry      | Integration of pMT795 in AM364                                | This study                     |
| MAB327  | CB15N $\Delta$ <i>ldpA</i> P <sub>xyi</sub> ::P <sub>xyi</sub> - <i>crbA</i> -mCherry      | Integration of pMT719 in AM364                                | This study                     |
| MAB328  | CB15N $\Delta$ <i>ldpA</i> P <sub>xyi</sub> ::P <sub>xyi</sub> - <i>bacA</i> - <i>cfp</i>  | Integration of pMT810 in AM364                                | This study                     |
| MAB329  | CB15N $\Delta$ <i>sdpAB</i> P <sub>xyi</sub> ::P <sub>xyi</sub> - <i>venus-mreB</i>        | Integration of pMT1003 in AZ22                                | This study                     |
| MAB330  | CB15N $\Delta$ <i>bacA</i> P <sub>xyi</sub> ::P <sub>xyi</sub> - <i>dipM</i> -mCherry      | Integration of pMT795 in JK55                                 | This study                     |
| MAB331  | CB15N $\Delta$ <i>sdpAB</i> P <sub>xyi</sub> ::P <sub>xyi</sub> - <i>dipM</i> -mCherry     | Integration of pMT795 in AZ22                                 | This study                     |



|        |                                                                                                               |                                 |                                  |
|--------|---------------------------------------------------------------------------------------------------------------|---------------------------------|----------------------------------|
| MAB360 | CB15N $\Delta dipM$ P <sub>xyI</sub> ::P <sub>xyI</sub> - <i>dipM</i> -mCherry                                | -                               | Zielinska <i>et al.</i> (2017)   |
| MAB386 | CB15N $\Delta amiC$ P <sub>xyI</sub> ::P <sub>xyI</sub> - <i>amiC</i>                                         | -                               | Zielinska <i>et al.</i> (2017)   |
| MAB389 | CB15N P <sub>xyI</sub> ::P <sub>xyI</sub> - <i>ldtD</i> -mCherry                                              | Integration of pMAB133 in CB15N | This study                       |
| MAB390 | CB15N P <sub>xyI</sub> ::P <sub>xyI</sub> - <i>ldtX</i> -mCherry                                              | Integration of pMAB134 in CB15N | This study                       |
| MT174  | CB15N <i>parB</i> :: <i>gfp-parB</i>                                                                          | -                               | Thanbichler <i>et al.</i> (2006) |
| MT199  | CB15N P <sub>van</sub> ::P <sub>van</sub> - <i>ftsZ-yfp</i>                                                   | -                               | Thanbichler <i>et al.</i> (2006) |
| MT257  | CB15N $\Delta bacA$                                                                                           | -                               | Kühn <i>et al.</i> (2010)        |
| MT258  | CB15N $\Delta dipM$                                                                                           | -                               | Möll <i>et al.</i> (2010)        |
| MT260  | CB15N <i>bacA</i> :: <i>bacA</i> - <i>cfp</i>                                                                 | -                               | Kühn <i>et al.</i> (2010)        |
| MT278  | CB15N P <sub>xyI</sub> ::P <sub>xyI</sub> - <i>venus-pbpZ</i>                                                 | -                               | Strobel <i>et al.</i> (2014)     |
| MT279  | CB15N P <sub>xyI</sub> ::P <sub>xyI</sub> - <i>venus-pbpC</i>                                                 | -                               | Strobel <i>et al.</i> (2014)     |
| MT286  | CB15N $\Delta pbpC$                                                                                           | -                               | Kühn <i>et al.</i> (2010)        |
| MT309  | CB15N P <sub>xyI</sub> ::P <sub>xyI</sub> - <i>venus-mreB</i>                                                 | Integration of pMT1003 in CB15N | This study                       |
| SW51   | CB15N $\Delta stpA \Delta stpB$                                                                               | -                               | Schlimpert <i>et al.</i> (2012)  |
| WS056  | CB15N $\Delta pbpY \Delta pbp1A \Delta pbpC \Delta pbpZ$<br>P <sub>xyI</sub> ::P <sub>xyI</sub> - <i>pbpX</i> | -                               | Strobel <i>et al.</i> (2014)     |

### ***E. coli* strains used in this study.**

| Strain | Genotype/description                                                                                                                                                                                                                                      | References |
|--------|-----------------------------------------------------------------------------------------------------------------------------------------------------------------------------------------------------------------------------------------------------------|------------|
| TOP10  | F <sup>-</sup> <i>mcrA</i> $\Delta$ ( <i>mrr-hsdRMS-mcrBC</i> ) $\Phi$ 80 <i>lacZ</i> $\Delta$ M15 $\Delta$ <i>lacX74</i> <i>recA1</i> <i>araD139</i> $\Delta$ ( <i>ara leu</i> ) 7697 <i>galU galK</i> <i>rpsL</i> (Str <sup>R</sup> ) <i>endA1 nupG</i> | Invitrogen |

### **General plasmids used in this work.**

| Plasmid  | Description                                                                                                                             | References                       |
|----------|-----------------------------------------------------------------------------------------------------------------------------------------|----------------------------------|
| pNPTS138 | <i>sacB</i> -containing suicide plasmid used for double homologous recombination, Kan <sup>R</sup>                                      | M.R. Alley, unpublished          |
| pXVENN-1 | Integrating plasmid for the construction of N-terminal fusions to Venus under the control of P <sub>xyI</sub> , Strep/Spec <sup>R</sup> | Thanbichler <i>et al.</i> (2007) |
| pXCHYC-2 | Integrating plasmid for the construction of C-terminal fusions to mCherry under the control of P <sub>xyI</sub> , Kan <sup>R</sup>      | Thanbichler <i>et al.</i> (2007) |
| pXGFNP-4 | Integrating plasmid for the construction of N-terminal fusions to GFP under the control of P <sub>xyI</sub> , Gen <sup>R</sup>          | Thanbichler <i>et al.</i> (2007) |
| pMT795   | Integrating plasmid for the synthesis of the DipM-mCherry fusion under the control of the P <sub>xyI</sub> , Kan <sup>R</sup>           | Möll <i>et al.</i> (2010)        |
| pMT810   | Integrating plasmid for the synthesis of the BacA-CFP fusion under the control of the P <sub>xyI</sub> , Kan <sup>R</sup>               | Kühn <i>et al.</i> (2010)        |

### **Plasmids generated in this work.**

| Plasmid | Description                                              | Construction                                                                                                                                                                                                                                                                                                                                       |
|---------|----------------------------------------------------------|----------------------------------------------------------------------------------------------------------------------------------------------------------------------------------------------------------------------------------------------------------------------------------------------------------------------------------------------------|
| pAM152  | pNPTS138 derivative for in-frame deletion of <i>crbA</i> | a) amplification of the CCNA_02243 flanking regions from CB15N chromosomal DNA using primers oAM265+oAM266 (upstream) and oAM267+oAM268 (downstream),<br>b) restriction of the upstream fragment with HindIII and EcoRI, restriction of the downstream fragment with EcoRI and NheI.<br>c) triple ligation with pNPTS138 cut with HindIII and NheI |
| pAZ11   | pNPTS138 derivative for in-frame deletion of CCNA_00354  | a) amplification of the CCNA_00354 flanking regions from CB15N chromosomal DNA using primers oAZ19+oAZ20 (upstream) and oAZ21+oAZ22 (downstream),<br>b) restriction of the upstream fragment with PstI and EcoRI, restriction of the downstream fragment with EcoRI and NheI.<br>c) triple ligation with pNPTS138 cut with PstI and NheI           |
| pAZ12   | pNPTS138 derivative for in-frame deletion of CCNA_02863  | a) amplification of the CCNA_02863 flanking regions from CB15N chromosomal DNA using primers oAZ23+oAZ24 (upstream) and oAZ25+oAZ26 (downstream),<br>b) restriction of the upstream fragment with HindIII and EcoRI, restriction of the downstream fragment with EcoRI and NheI.<br>c) triple ligation with pNPTS138 cut with PstI and NheI        |
| pAZ26   | pNPTS138 derivative for in-frame deletion of <i>ldtD</i> | a) amplification of the CCNA_01579 flanking regions from CB15N chromosomal DNA using primers oAZ70+oAZ71 (upstream) and oAZ72+oAZ73 (downstream),<br>b) restriction of the upstream fragment with PstI and EcoRI, restriction of the downstream fragment with EcoRI and NheI.<br>c) triple ligation with pNPTS138 cut with PstI and NheI           |
| pAZ30   | pNPTS138 derivative for in-frame deletion of <i>ldtX</i> | a) amplification of the CCNA_03860 flanking regions from CB15N chromosomal DNA using primers oAZ81+oAZ82 (upstream) and oAZ83+oAZ84 (downstream),                                                                                                                                                                                                  |

|         |                                                                                           |                                                                                                                                                                                                                                                                                                                                                                                                                                                                                                                                                                                                                      |
|---------|-------------------------------------------------------------------------------------------|----------------------------------------------------------------------------------------------------------------------------------------------------------------------------------------------------------------------------------------------------------------------------------------------------------------------------------------------------------------------------------------------------------------------------------------------------------------------------------------------------------------------------------------------------------------------------------------------------------------------|
|         |                                                                                           | b) restriction of the upstream fragment with HindIII and EcoRI, restriction of the downstream fragment with EcoRI and NheI.                                                                                                                                                                                                                                                                                                                                                                                                                                                                                          |
| pMT719  | pXCHYC-2 derivative bearing <i>crbA-mCherry</i>                                           | c) triple ligation with pNPTS138 cut with HindIII and NheI<br>a) amplification of CCNA_02243 from CB15N chromosomal DNA using primers oMT657+oMT658, restriction with NdeI and SacI<br>b) ligation with pXCHYC-2 cut with NdeI and SacI                                                                                                                                                                                                                                                                                                                                                                              |
| pMT1003 | pXVENN-1 derivative bearing <i>venus-mreB</i>                                             | a) amplification of CCNA_01612 from CB15N chromosomal DNA using primers oMT1107+oMT1112, restriction with BglII and NheI<br>b) ligation with pXVENN-1 cut with BglII and NheI                                                                                                                                                                                                                                                                                                                                                                                                                                        |
| pMAB60  | pNPTS138 derivative for in-frame deletion of <i>CCNA_03856</i>                            | a) amplification of the CCNA_03856 flanking regions from CB15N chromosomal DNA using primers oMAB235+oMAB218 (upstream) and oMAB219+oMAB236 (downstream)<br>b) double-joint PCR with oMAB235 and oMAB236 and restriction of the PCR product with EcoRI and HindIII,<br>c) ligation with pNPTS138 cut with EcoRI and HindIII                                                                                                                                                                                                                                                                                          |
| pMAB62  | pNPTS138 derivative for in-frame deletion of <i>CCNA_03031</i>                            | a) amplification of the CCNA_03031 flanking regions from CB15N chromosomal DNA using primers oMAB245+oMAB246 (upstream) and oMAB247+oMAB248 (downstream)<br>b) double-joint PCR with oMAB245 and oMAB248 and restriction of the PCR product with EcoRI and HindIII,<br>c) ligation with pNPTS138 cut with EcoRI and HindIII                                                                                                                                                                                                                                                                                          |
| pMAB64  | pNPTS138 derivative for in-frame replacement of <i>mreB</i> with <i>mreB<sup>sw</sup></i> | a) amplification of the CCNA_01612 coding regions from CB15N chromosomal DNA using primers oMAB231+oMAB206 (upstream coding region until 227 codon) and oMAB209+oMAB233 (downstream coding region from 228 codon)<br>b) amplification of the mCherry coding region from pXCHYC-2 using primers oMAB207+oMAB208 bearing appropriate linkers and compatible regions with the CCNA_02243 fragments<br>c) triple-joint PCR with oMAB231 and oMAB233 of the upstream, downstream and mCherry fragments and restriction of the PCR product with EcoRI and HindIII,<br>d) ligation with pNPTS138 cut with EcoRI and HindIII |
| pMAB65  | pXGFNP-4 derivative bearing <i>gfp-pbp2</i>                                               | a) amplification of CCNA_01615 from CB15N chromosomal DNA using primers oMAB221+oMAB222, restriction with KpnI and NheI<br>b) ligation with pXGFNP-2 cut with KpnI and NheI                                                                                                                                                                                                                                                                                                                                                                                                                                          |
| pMAB66  | pXCHYC-2 derivative bearing <i>mreC-mCherry</i>                                           | a) amplification of CCNA_01613 from CB15N chromosomal DNA using primers oMAB185+oMAB186, restriction with NdeI and KpnI<br>b) ligation with pXCHYC-2 cut with NdeI and KpnI                                                                                                                                                                                                                                                                                                                                                                                                                                          |
| pMAB67  | pNPTS138 derivative for in-frame replacement of <i>pbp2</i> with <i>gfp-pbp2</i>          | a) amplification of the CCNA_01615 upstream flanking region from CB15N chromosomal DNA using primers oMAB241+oMAB242 and the GFP with the first 685bp of CCNA_01615 coding region from pMAB65 with primers oMAB243+oMAB244<br>b) double-joint PCR with oMAB241 and oMAB244 of the upstream and downstream fragments and restriction of the PCR product with EcoRI and HindIII,<br>d) ligation with pNPTS138 cut with EcoRI and HindIII                                                                                                                                                                               |
| pMAB70  | pNPTS derivative for in-frame deletion of <i>CCNA_03431</i>                               | a) PCR amplification of the CCNA_03431 flanking regions from chromosomal DNA using primers oMAB215+oMAB202 (upstream) and oMAB203+oMAB204 (downstream)<br>b) double-joint PCR with oMAB215 and oMAB204 of the upstream and downstream fragments and restriction of the PCR product with PstI and EcoRI,<br>d) ligation with pNPTS138 cut with PstI and EcoRI                                                                                                                                                                                                                                                         |
| pMAB133 | pXCHYC-2 derivative bearing <i>ldtD-mCherry</i>                                           | a) amplification of CCNA_01579 from CB15N chromosomal DNA using primers oMAB383+oMAB384<br>b) Gibson assembly with pXCHYC-2 cut with NdeI and KpnI                                                                                                                                                                                                                                                                                                                                                                                                                                                                   |
| pMAB134 | pXCHYC-2 derivative bearing <i>ldtX-mCherry</i>                                           | a) amplification of CCNA_03860 from CB15N chromosomal DNA using primers oMAB385+oMAB386<br>b) Gibson assembly with pXCHYC-2 cut with NdeI and KpnI                                                                                                                                                                                                                                                                                                                                                                                                                                                                   |

### Oligonucleotides used in this work.

| ID     | Oligonucleotide | Sequence (5' to 3') <sup>1</sup>    | Restriction site |
|--------|-----------------|-------------------------------------|------------------|
| oAM265 | CC2161_265f     | TATAAGCTTGACTTGGCGGGCGGACTTGATCTTC  | HindIII          |
| oAM266 | CC2161_266r     | TAGAATTCGGTAAGCCTGGCGAACATGAAGCGAC  | EcoRI            |
| oAM267 | CC2161_267f     | TAGAATTCATTGTGCTGAAGCCGTAGGCGAAAC   | EcoRI            |
| oAM268 | CC2161_268r     | TTTTTGTAGCAAGGCCGTGATTGAGAAGCTGGTGC | NheI             |
| oAZ19  | CCNA_00354-1f   | TACTGCAGGCGCTGCGTATCGTGCCGTGC       | PstI             |
| oAZ20  | CCNA_00354-2r   | TAGAATTCAAAAGAGTGTTTATCACGCTC       | EcoRI            |
| oAZ21  | CCNA_00354-3f   | TAGAATTCCTCAACAACAGCCGACCGCG        | EcoRI            |
| oAZ22  | CCNA_00354-4r   | TATAGCTAGCAGGCGAGGCGCCGCGCATGTCC    | NheI             |
| oAZ23  | CCNA_02863-1f   | TATAAAGCTTCGGCGGCTGGAGTCCCGGCGC     | HindIII          |

|         |                       |                                                                                                 |         |
|---------|-----------------------|-------------------------------------------------------------------------------------------------|---------|
| oAZ24   | CCNA_02863-2r         | <b>TAGAATTC</b> GGATTGCGCGCCCCCGCGCT                                                            | EcoRI   |
| oAZ25   | CCNA_02863-3f         | <b>TAGAATTC</b> TCCAGGAGCGCGCACCTCAGGCTGA                                                       | EcoRI   |
| oAZ26   | CCNA_02863-4r         | TATAG <b>CTAGC</b> CGCGCGATCCCGTCGATCGGG                                                        | NheI    |
| oAZ70   | CCNA_01579-1          | <b>TACTGCAG</b> AAGAAGAAGGCCATCAAGTC                                                            | PstI    |
| oAZ71   | CCNA_01579-2          | <b>TAGAATTC</b> GGCGCCGAGGTTCTCGTAAA                                                            | EcoRI   |
| oAZ72   | CCNA_01579-3          | <b>TAGAATTC</b> CGTGATCTGGTGACGCGTAT                                                            | EcoRI   |
| oAZ73   | CCNA_01579-4          | TATAG <b>CTAGCT</b> GGAACGGCCCTTGCTCTG                                                          | NheI    |
| oAZ82   | CCNA_03860-1          | TATA <b>AAGCTT</b> GCGGAACGGCTTGGTCACAT                                                         | HindIII |
| oAZ83   | CCNA_03860-2          | <b>TAGAATTC</b> GGCGCCGTCAGCATGGGCTC                                                            | EcoRI   |
| oAZ84   | CCNA_03860-3          | <b>TAGAATTC</b> CCCGCGACGCGCTCCAGATT                                                            | EcoRI   |
| oAZ85   | CCNA_03860-4          | TATAG <b>CTAGC</b> CGTGAGGCGGTCGGCTTTTT                                                         | NheI    |
| oMT657  | CC2161-uni            | TTAATT <b>CATATG</b> TTCCGACGCTTACCTCCGCC                                                       | NdeI    |
| oMT658  | CC2161-rev            | <b>TAGAGCT</b> CCCGGCTTACGACAATGCAGGGCATG                                                       | SacI    |
| oMT1107 | mreb-for              | TTT <b>AGATCT</b> ATGTTCTCTCCCTTTTGGCGTGATCTCG                                                  | BglII   |
| oMT1112 | mreB-rev3             | TTA <b>AGCTAGC</b> CTAGGCCAGCGTGGATTCCAGGACGC                                                   | NheI    |
| oMAB235 | CC3740UpF(EcoRI)      | ATAT <b>GAATTC</b> GGGCCCAAAGCCCGCTGCC                                                          | EcoRI   |
| oMAB218 | CC3740UpR             | TTCGGCGTCAGCCGATAAAGACGCGCCAGCGAGGTGTAGGCCAGG                                                   | -       |
| oMAB219 | CC3740DowF            | CCTGGCTACACCTCGCTGGCGCGCTTTTATCGGCTGACGCCGAA                                                    | -       |
| oMAB236 | CC3740DowR(HindIII)   | ATATA <b>AAGCTT</b> CCCTGGATTGTTCTGAAAGGGTGAACC                                                 | HindIII |
| oMAB245 | CCNA03031UpF-BamHI    | ATAT <b>GGATCC</b> CCCGCCACGCTCTGGCGCT                                                          | BamHI   |
| oMAB246 | CCNA03031UpR          | CGATACCCAGCACCCCGCCAGGGTGAGGCGGCGGTCTG                                                          | -       |
| oMAB247 | CCNA03031DoF          | CGACCGCCGCTCACCTGGGCGGGGTGCTGGGGTATCG                                                           | -       |
| oMAB248 | CCNA03031DR-HindIII   | ATATA <b>AAGCTT</b> GCACGGGCCCGCCCTGT                                                           | HindIII |
| oMAB231 | MreBUpF (EcoRI)       | ATAT <b>GAATTC</b> ATGTTCTCTCCCTTTTGGCGGTGA                                                     | EcoRI   |
| oMAB206 | MreB-mChe UpR         | TGTTATCCTCTCGCCCTTGCTCACGCTCGAGCCAGAGTCGGCCGGCGCGG<br>G                                         | -       |
| oMAB207 | mChe-MreB-F           | CCC <span style="color: red;">CGCGCGCGCGG</span> CGGACTCTGGCTCGAGCGTGAGCAAGGGCGAGGAGGATA<br>ACA | -       |
| oMAB208 | mChe-MreB-R           | ACGTCGATCGACAGACCTTCGCGCCCGCGCGCCAGACTTGTACAGCTCGT<br>CCATGCCGCC                                | -       |
| oMAB209 | MreB-mChe-DF          | GGCGGCATGGACGAGCTGTACAAGTCTGGCGCGCGGCGGCGGAAGTCTG<br>TCGATCGACGT                                | -       |
| oMAB233 | MreB-DR(HindIII)      | ATATA <b>AAGCTT</b> CTAGGCCAGCGTGATTCCAGGAC                                                     | HindIII |
| oMAB221 | Pbp2F(KpnI)           | ATAT <b>GGTACC</b> AGCGAACCCTCCATCTCTTTTTCGAG                                                   | KpnI    |
| oMAB222 | Pbp2R(NheI)           | ATAT <b>CTAGCT</b> CATGTCTGGCCTCCCTGCGGAGTTG                                                    | NheI    |
| oMAB185 | MreCF(NdeI)           | ATAT <b>CATATG</b> CGCTTTCTGGAAGTCCGCTGG                                                        | NdeI    |
| oMAB186 | MreCR(KpnI)           | ATAT <b>GGTACCT</b> CGGGCGCTCCCGTCTGAG                                                          | KpnI    |
| oMAB241 | PBP2UPST-UF(EcoRI)    | ATAT <b>GAATTC</b> CCCTCGATCCTGCGAACCCCGTCT                                                     | EcoRI   |
| oMAB242 | PBP2UPSTGFP-UR        | AGCTCCTCGCCCTTGCTCACCATCGCCTCACCGGAACCGCACG                                                     | -       |
| oMAB243 | PBP2UPSTGFP-DF        | CGTGGGTTCCGGTGAGGCGATGGTGAGCAAGGGCGAGGAGCT                                                      | -       |
| oMAB244 | PBP2-DR(HindIII)      | ATATA <b>AAGCTT</b> TGGCGCCGGCGCGCC                                                             | HindIII |
| oMAB215 | CC3322UpF(PstI)       | ATAT <b>CTGAG</b> AGACCGTCTCGGGAATCGGCC                                                         | PstI    |
| oMAB202 | CC3322UpR             | CTGATCCCGGCTGGCCTTCAAGAAAGACGCGACGATCCATAGC                                                     | -       |
| oMAB203 | CC3322DoF             | GCTATGGATCGTCGCTTCTTCTGTTCTGAAGGCCAGGCCGGATCAG                                                  | -       |
| oMAB204 | CC3322DoR(EcoRI)      | ATAT <b>GAATTC</b> CCCGCGAACCTGGAGGGCCAT                                                        | EcoRI   |
| oMAB383 | CCNA_01579-NdeI       | TCGAGTTTTGGGGAGACGAC <b>CATATG</b> CGATTTACGAGAACCTGCG                                          | NdeI    |
| oMAB384 | CCNA_01579-KpnI       | TCCGGAGCTCGAGATCTTA <b>AGGTACC</b> GATGCGGGGATACGCTGCA                                          | KpnI    |
| oMAB385 | CCNA_03860-pXC-F      | TCGAGTTTTGGGGAGACGAC <b>CATATG</b> CTGTTTTCGAGCCATGCTGAC                                        | NdeI    |
| oMAB386 | CCNA_03860 pXC-KpnI-R | TCTCCGGAGCTCGAGATCTTA <b>AGGTACC</b> GATGCGGAGAATCTGGACGGCGT                                    | KpnI    |

<sup>1</sup> Restriction sites are indicated in boldface.
